# Supplementary material for: Acetylpyrene-labelled 7-methylguanine nucleotides: unusual fluorescence properties and application to decapping scavenger activity monitoring
Source: Royal Society of Chemistry journal article supplement (doi:10.1039/c6ob00419a), 2016-01-01

## **Acetylpyrene-labelled 7-methylguanine nucleotides: unusual fluorescence properties and application to Decapping Scavenger activity monitoring**

Renata Kasprzyk<sup>1,2,3</sup>, Joanna Kowalska<sup>1</sup>, Zbigniew Wieczorek<sup>4</sup>, Mariusz Szabelski<sup>4</sup>, Ryszard Stolarski<sup>1</sup>, Jacek Jemielity<sup>2</sup>

<sup>1</sup>*Division of Biophysics, Institute of Experimental Physics, Faculty of Physics, University of Warsaw, Zwirki i Wigury 93, 02-089 Warsaw, Poland*

<sup>2</sup>*Centre of New Technologies, University of Warsaw, Poland*

<sup>3</sup>*College of Inter-Faculty Individual Studies in Mathematics and Natural Sciences, University of Warsaw, Zwirki i Wigury 93, 02-089, Warsaw, Poland*

<sup>4</sup>*Department of Physics and Biophysics, University of Warmia and Mazury in Olsztyn, Oczapowskiego 4, 10-719 Olsztyn, Poland*

**Supporting Information (SI2): HPLC profiles, HR MS, NMR and fluorescence spectra**

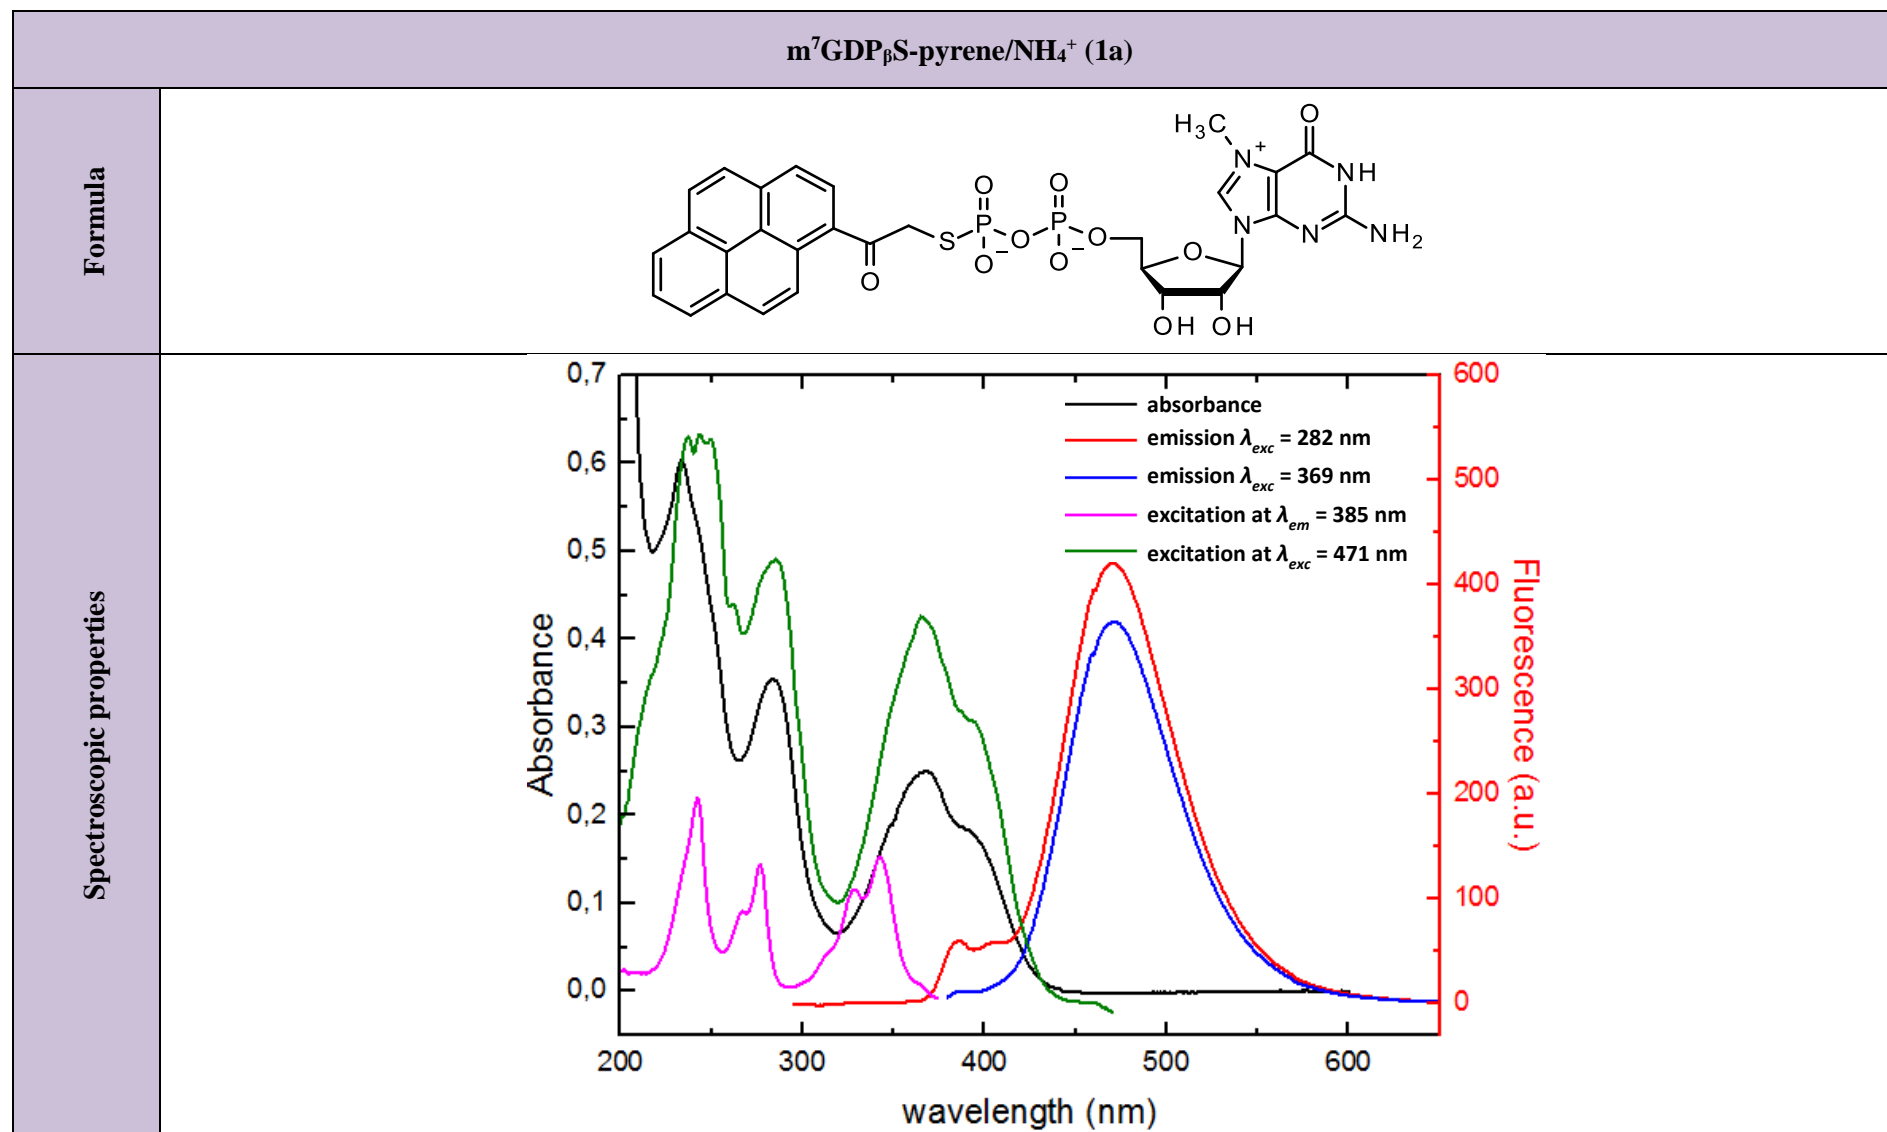

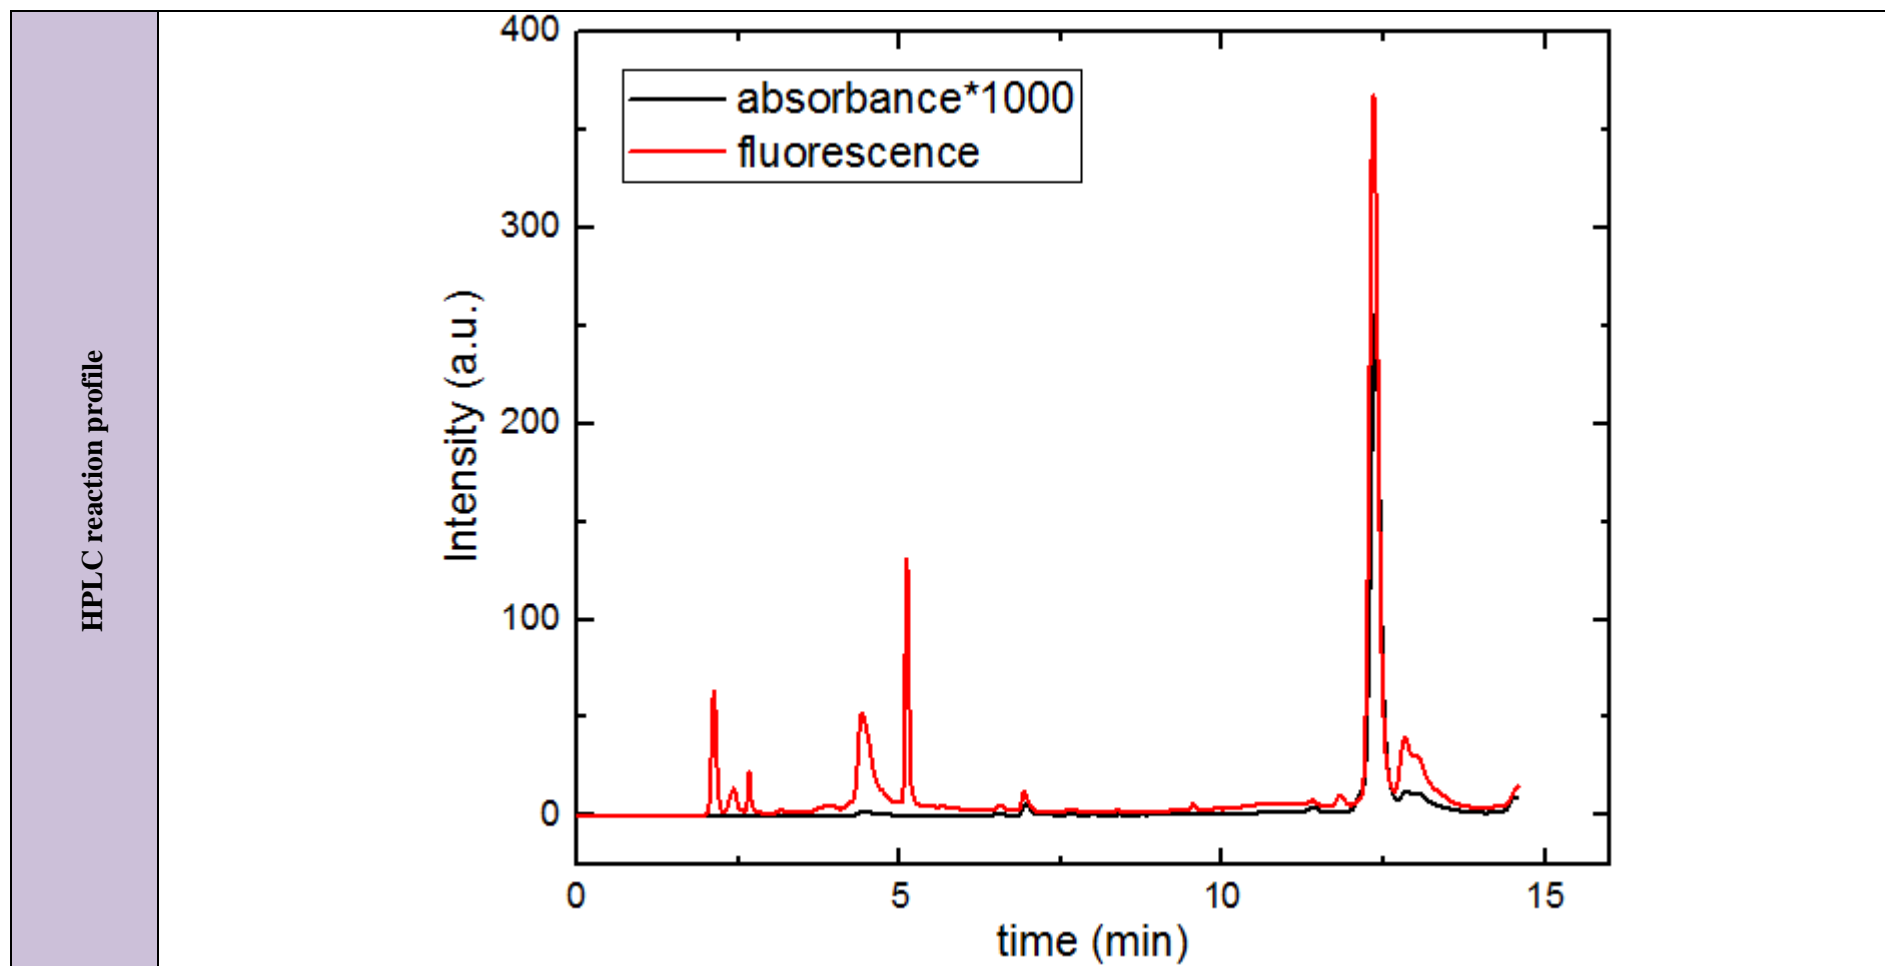

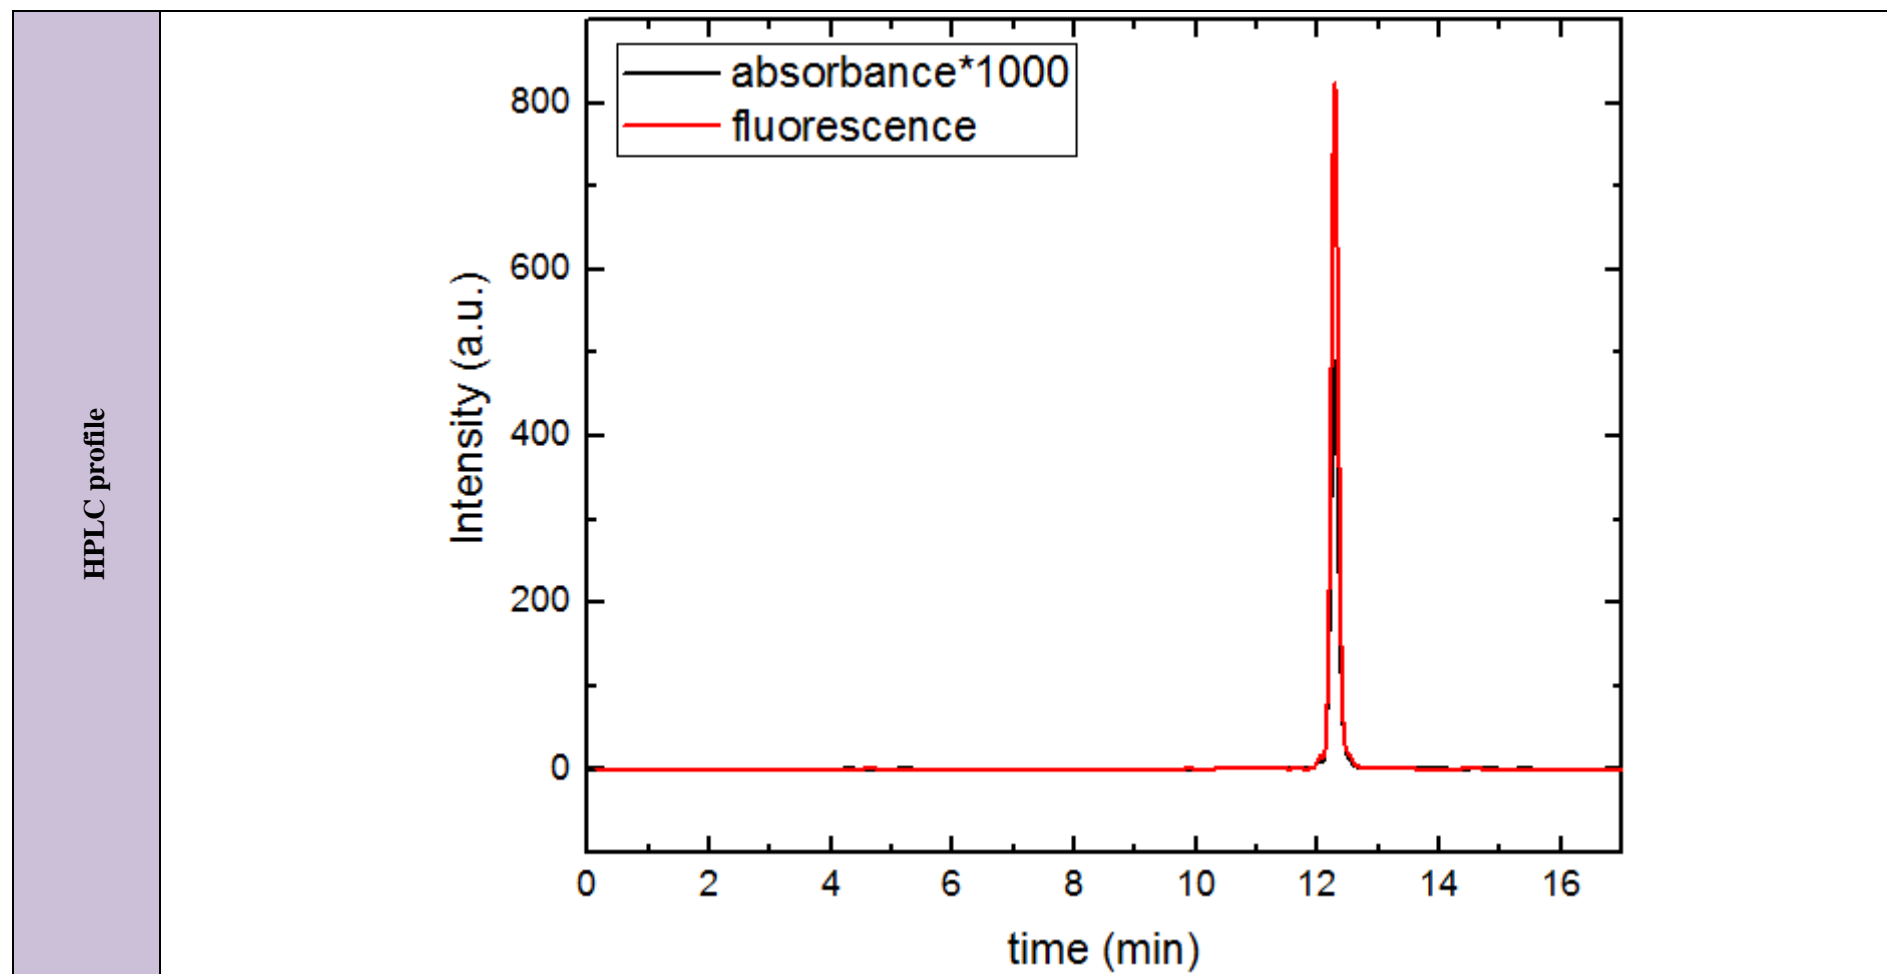

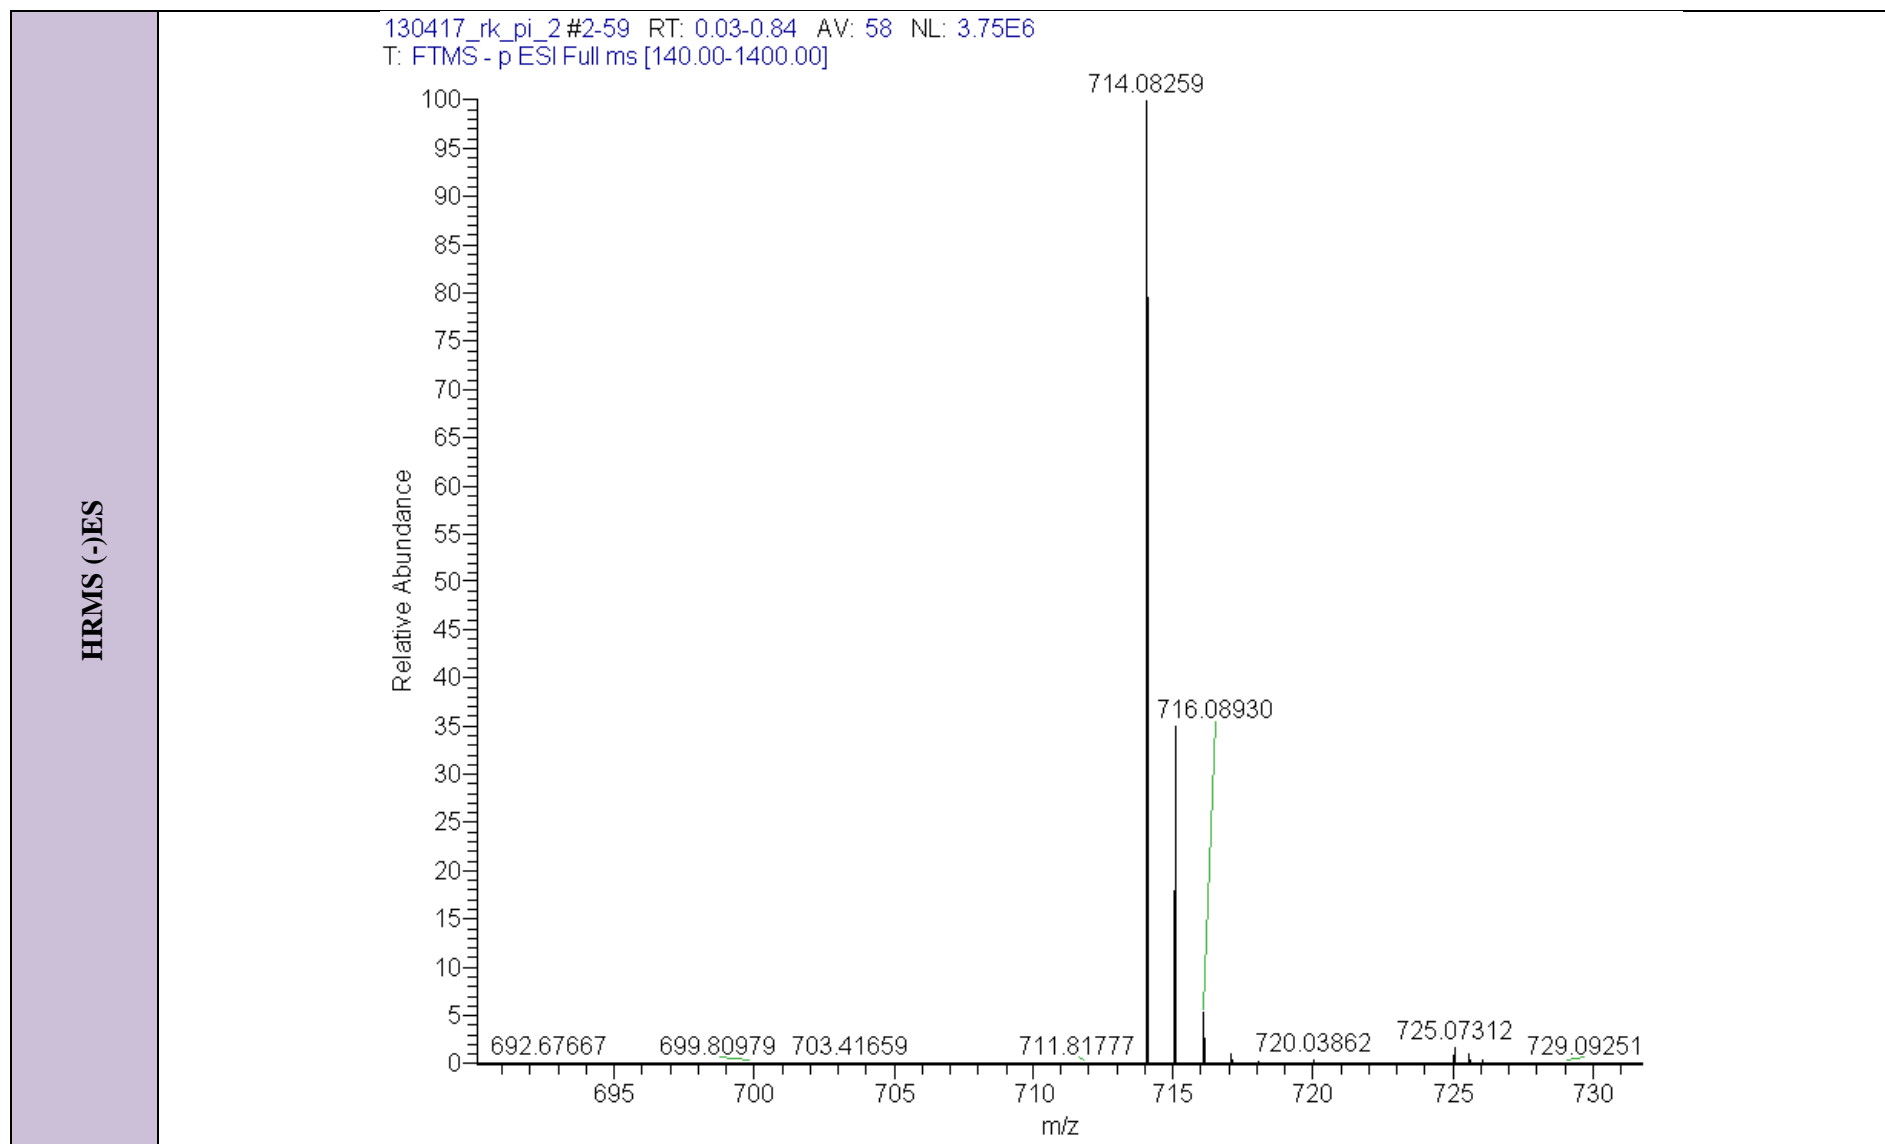

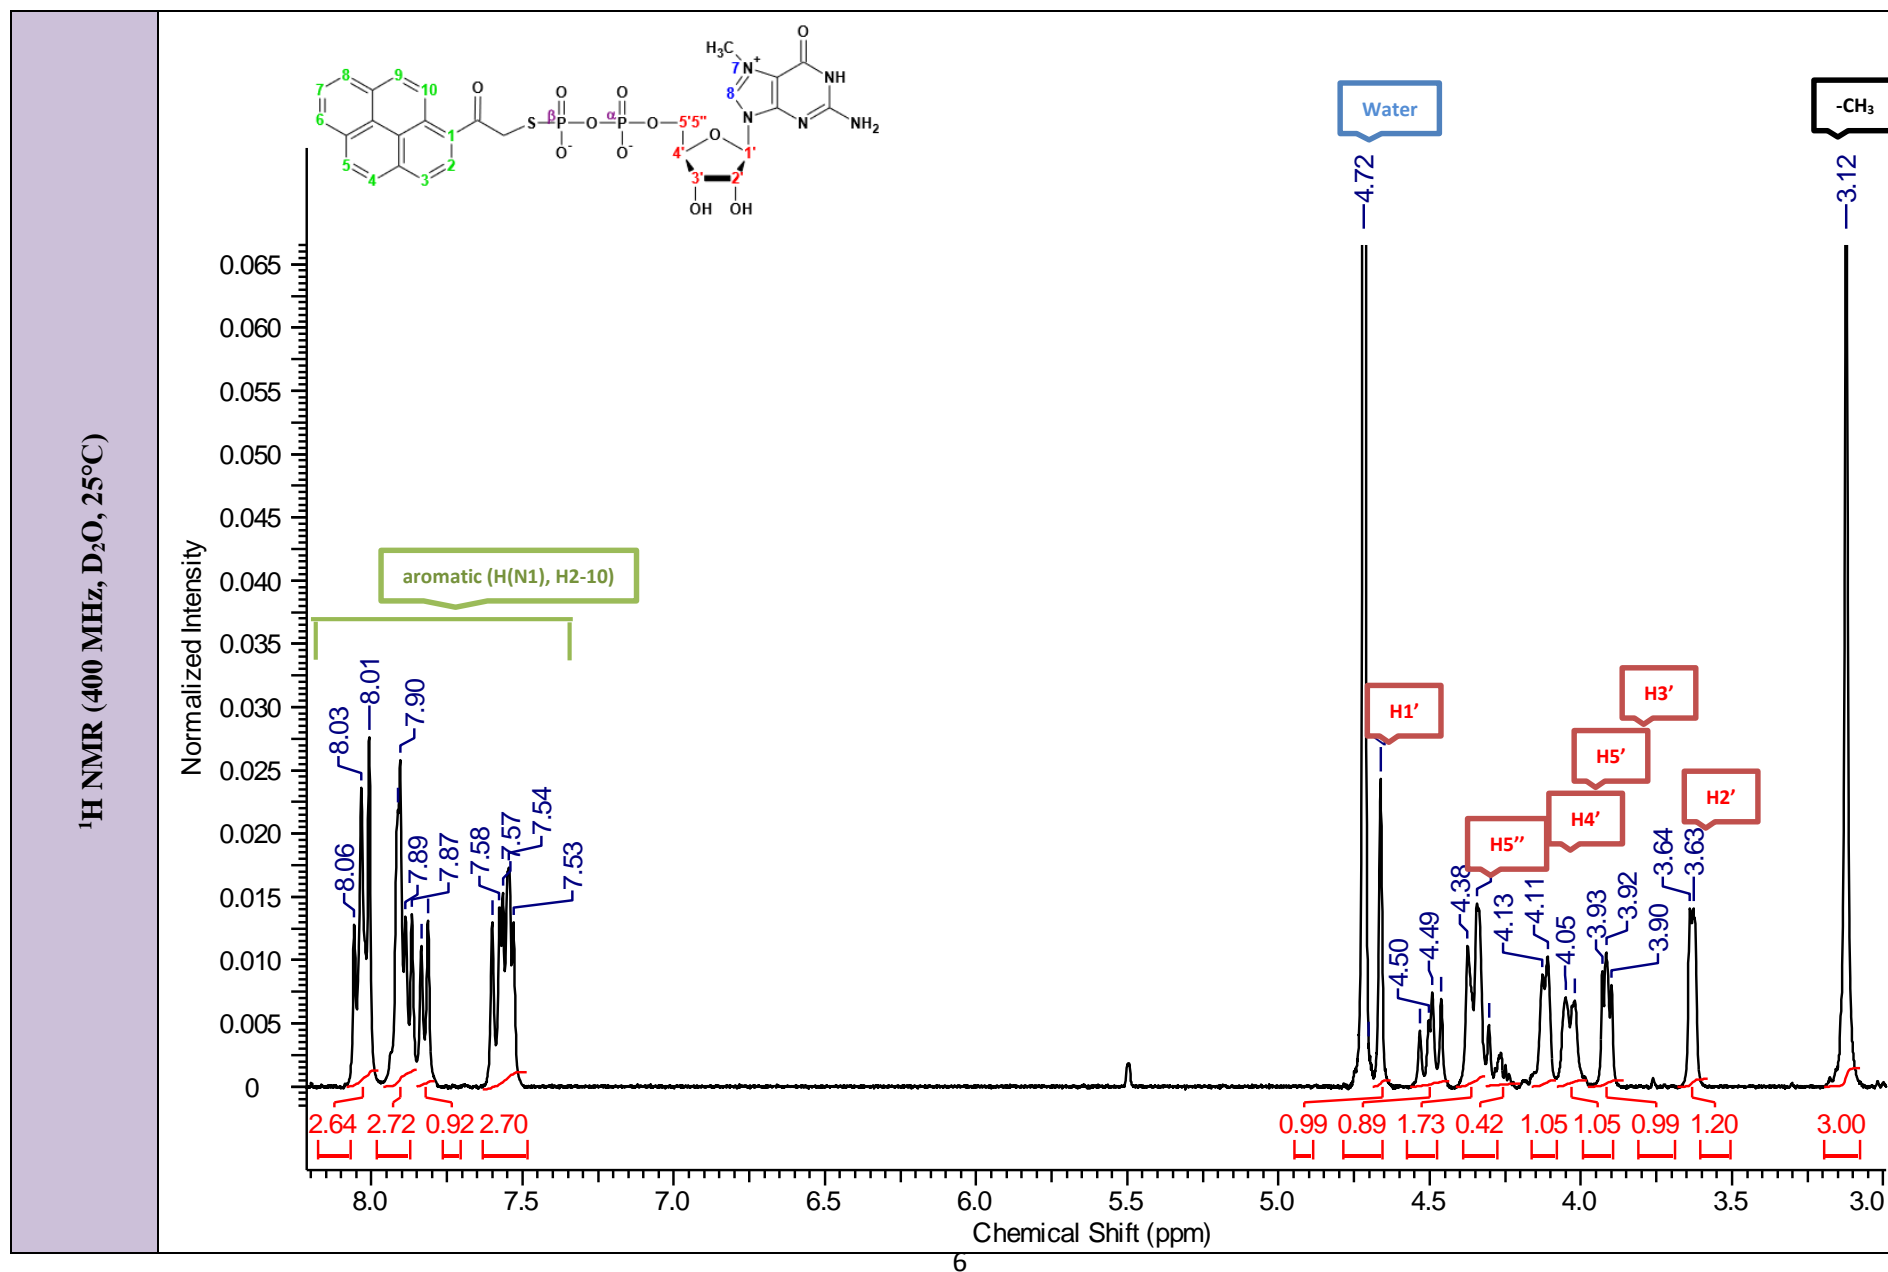

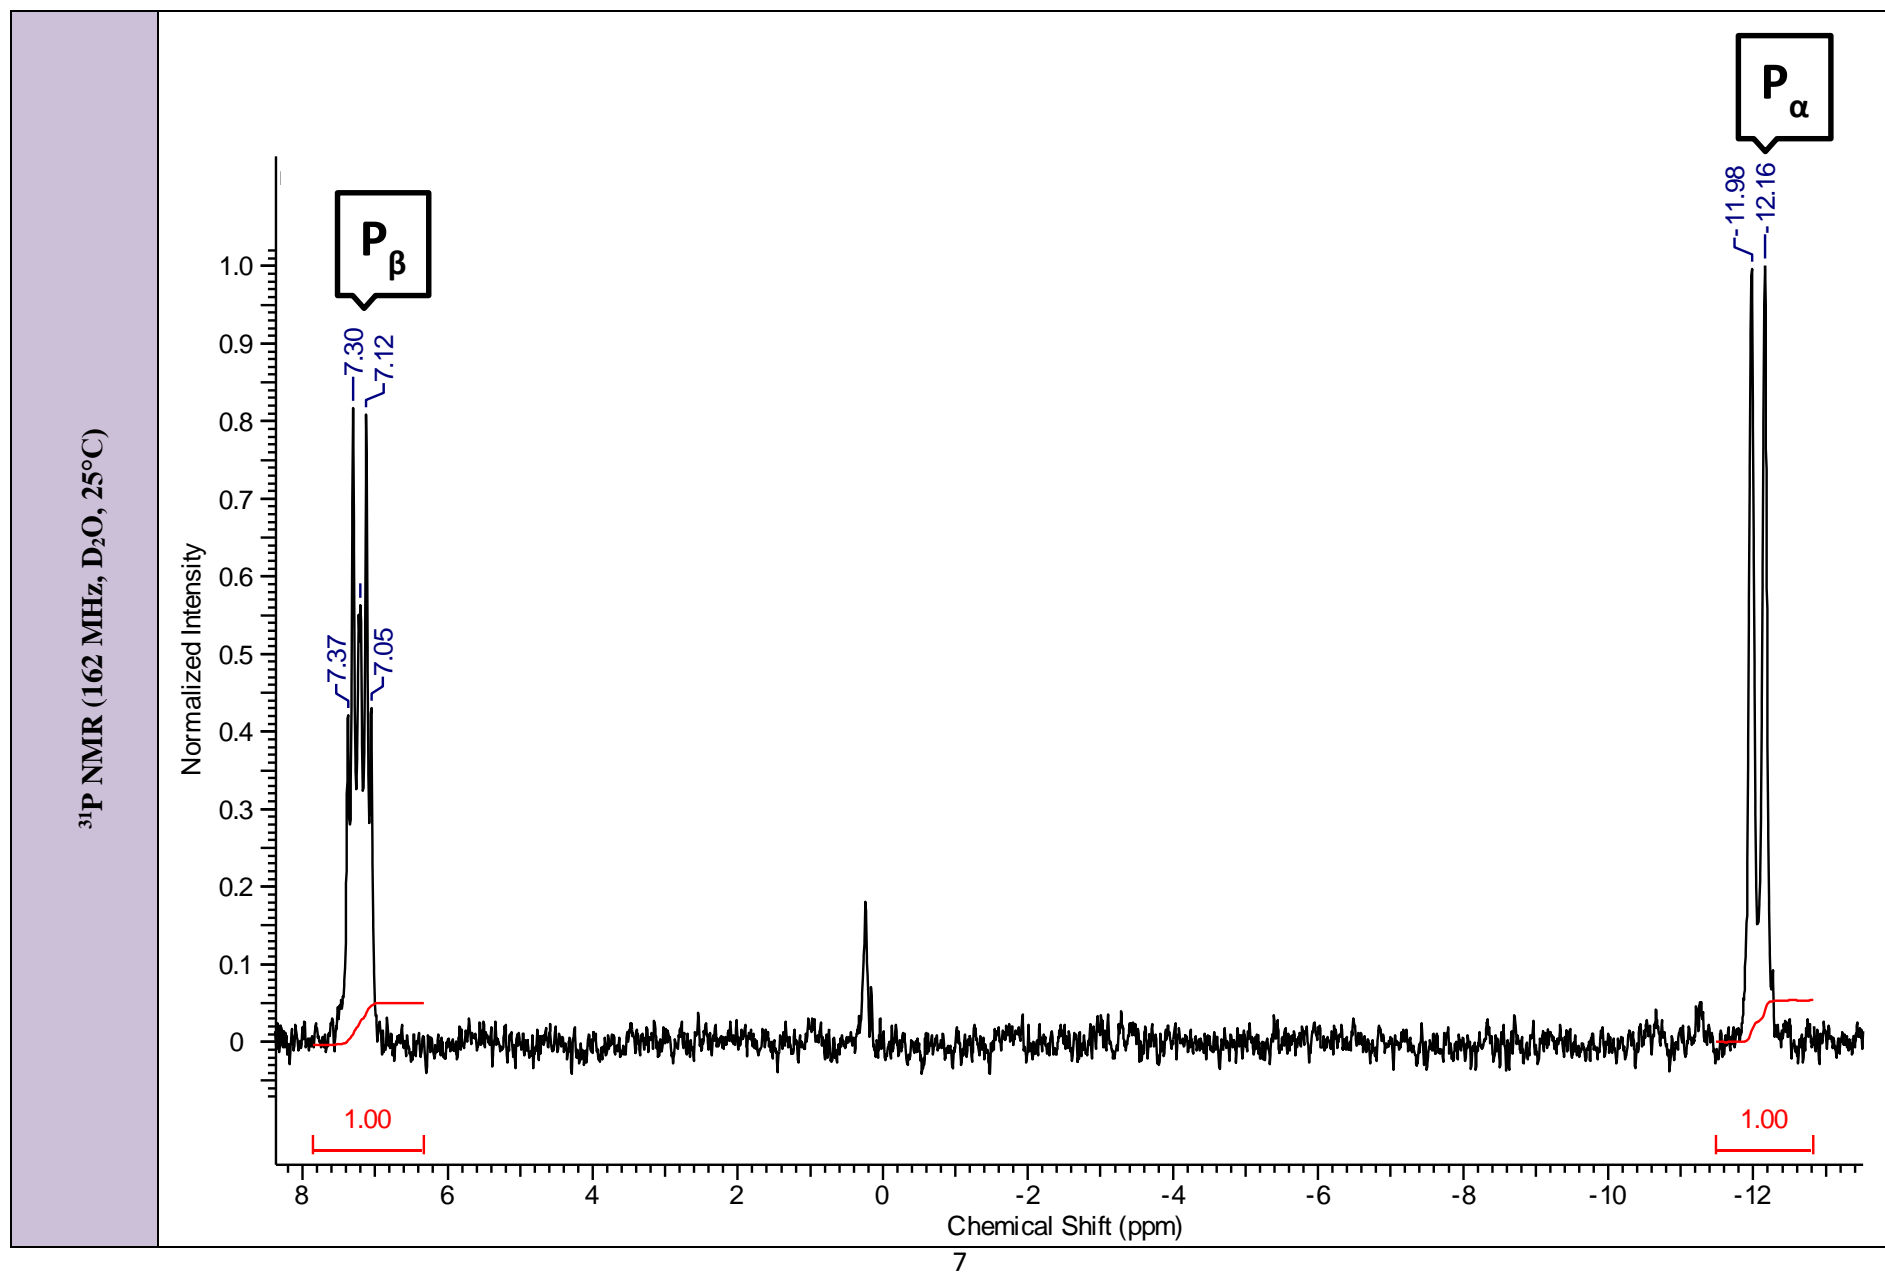

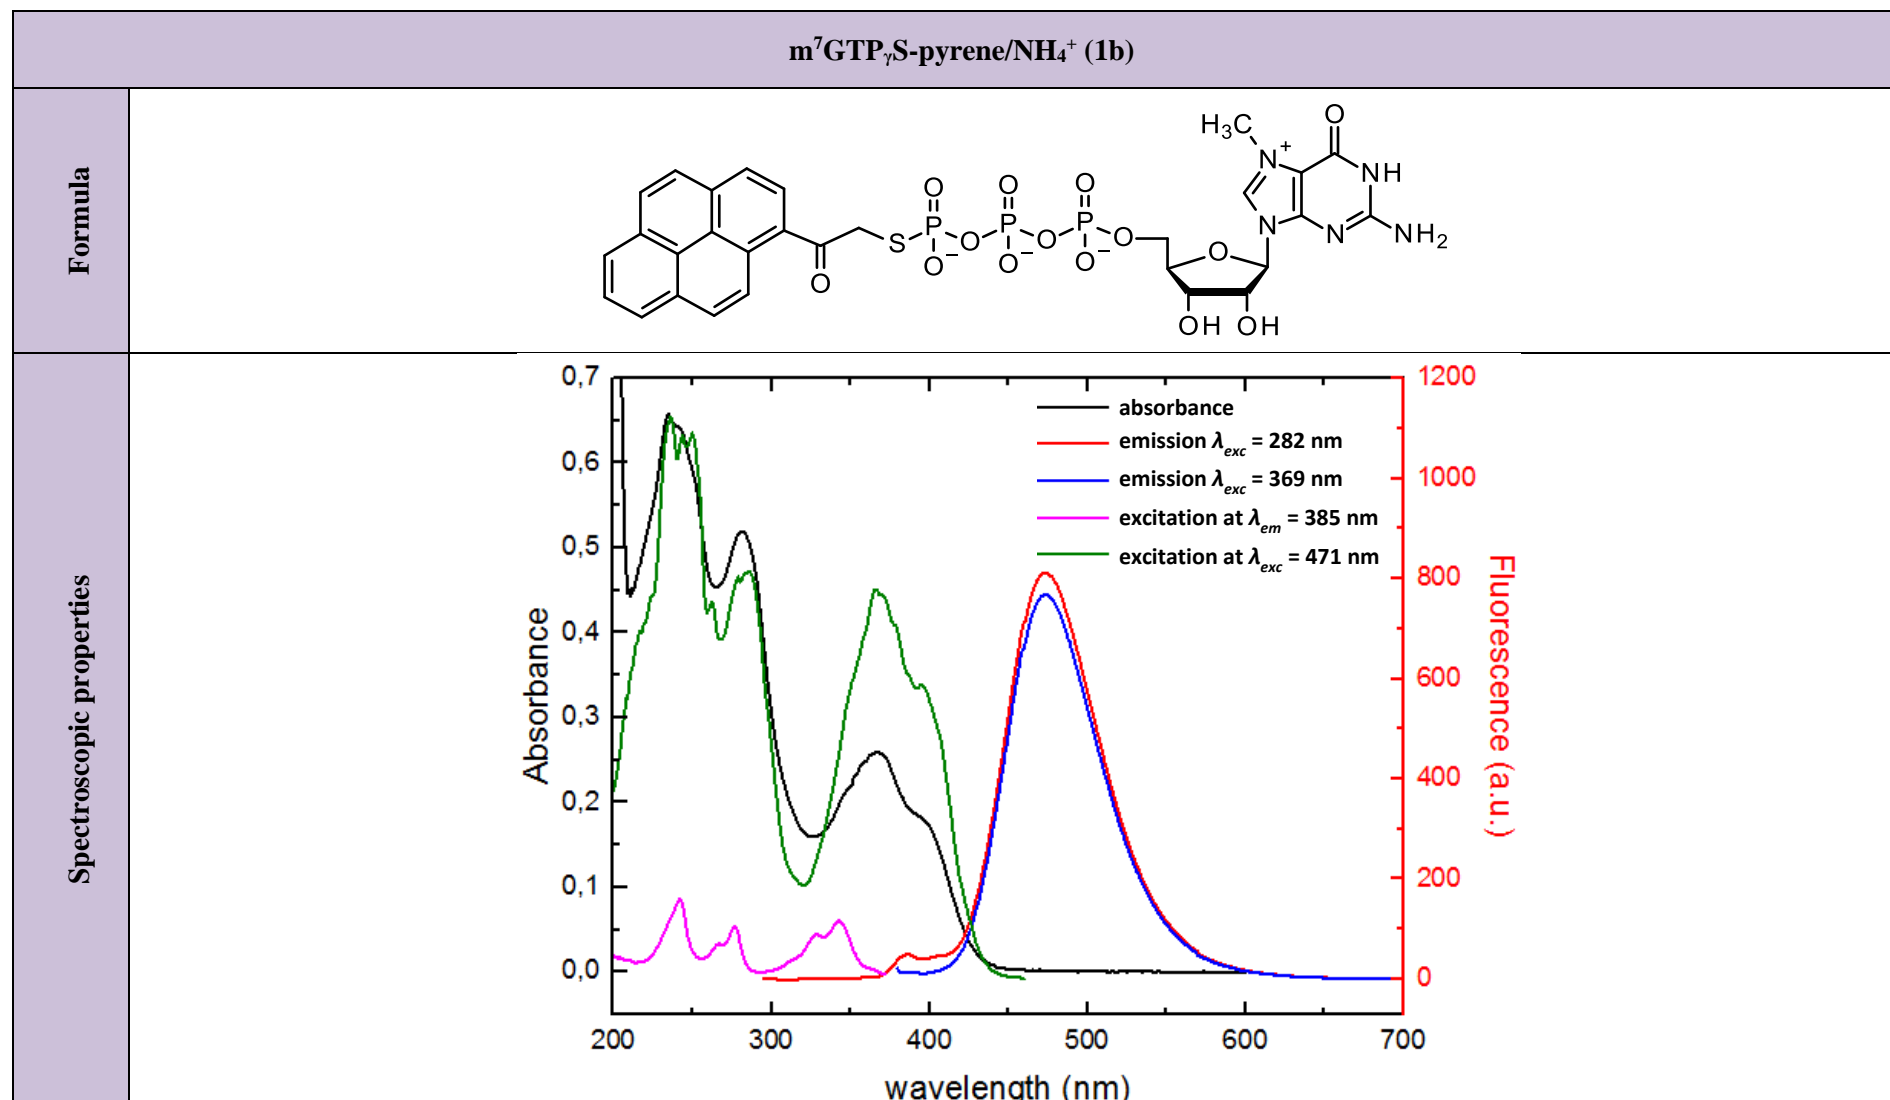



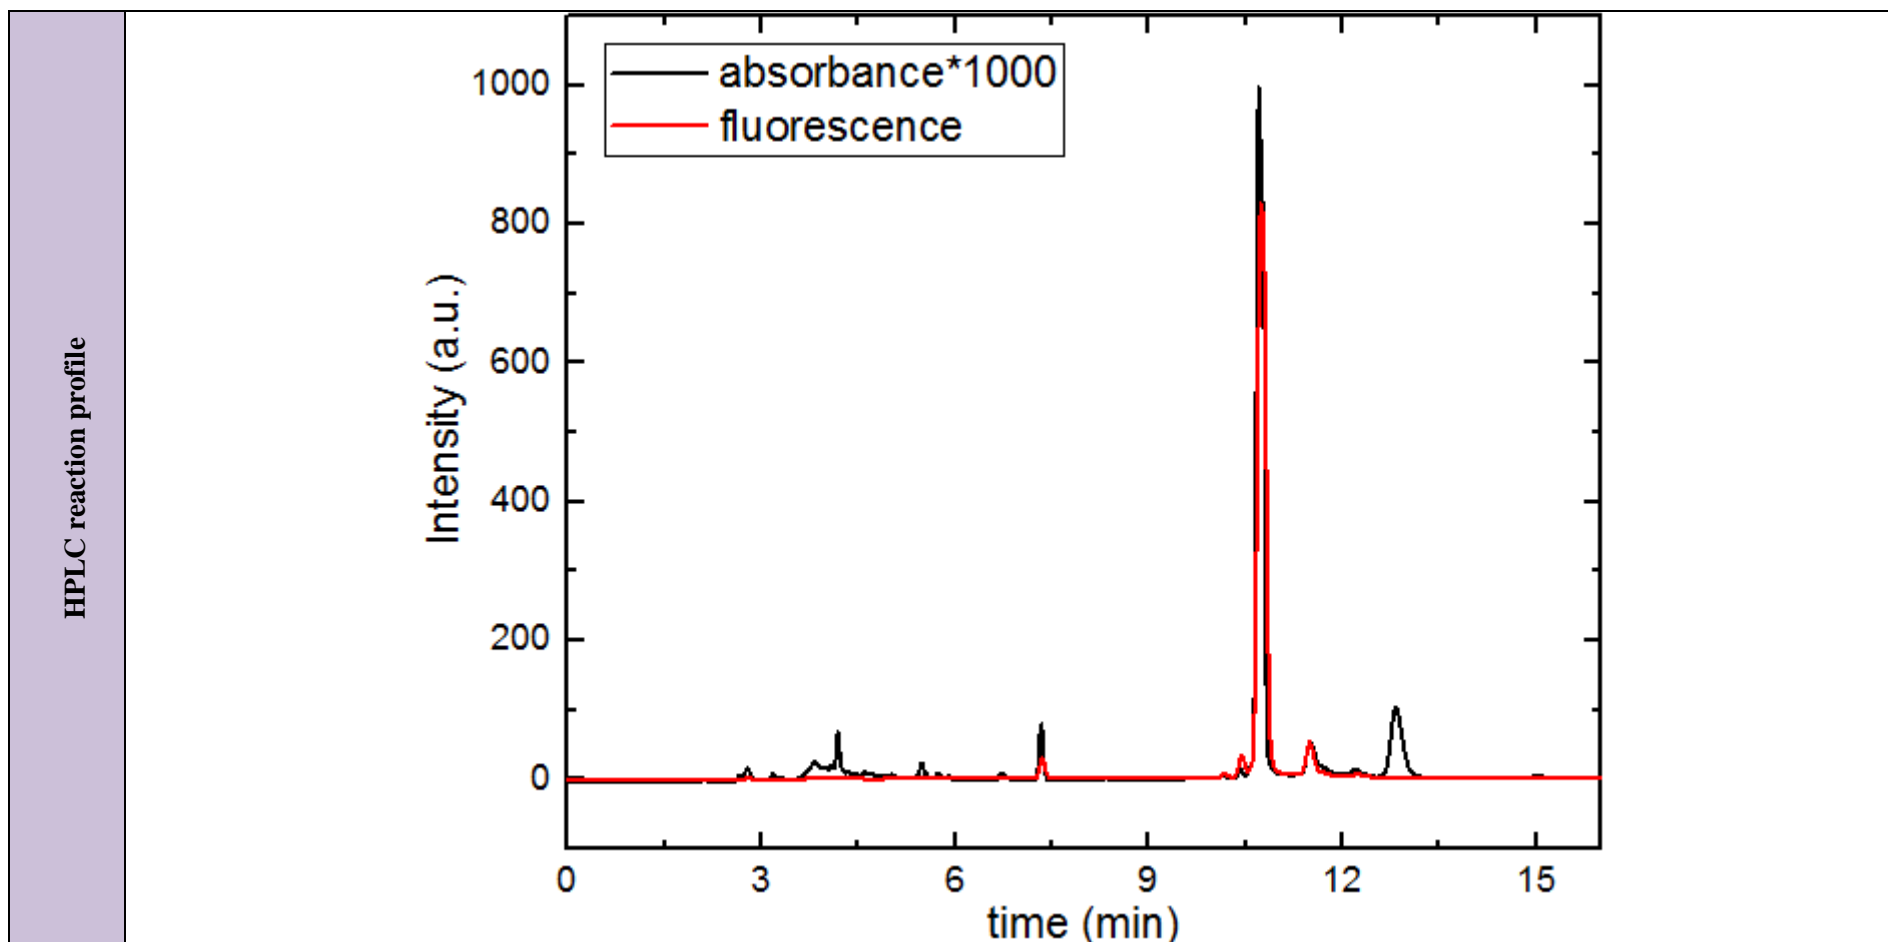

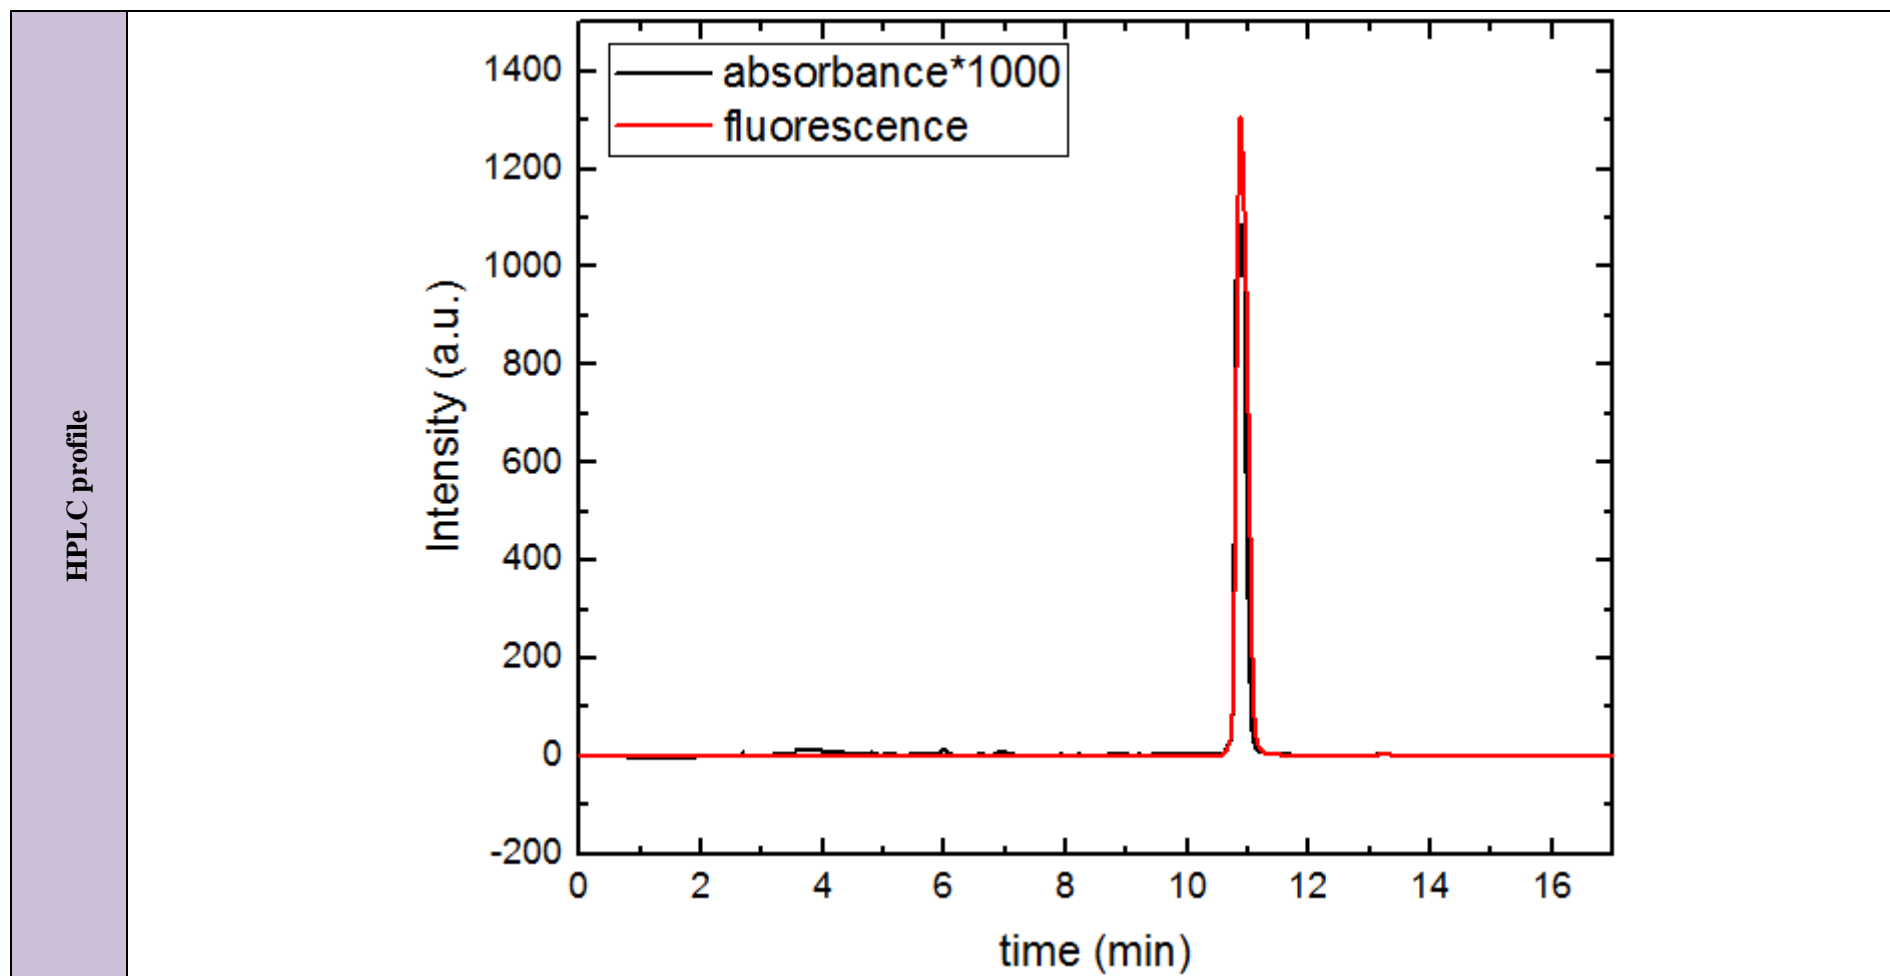

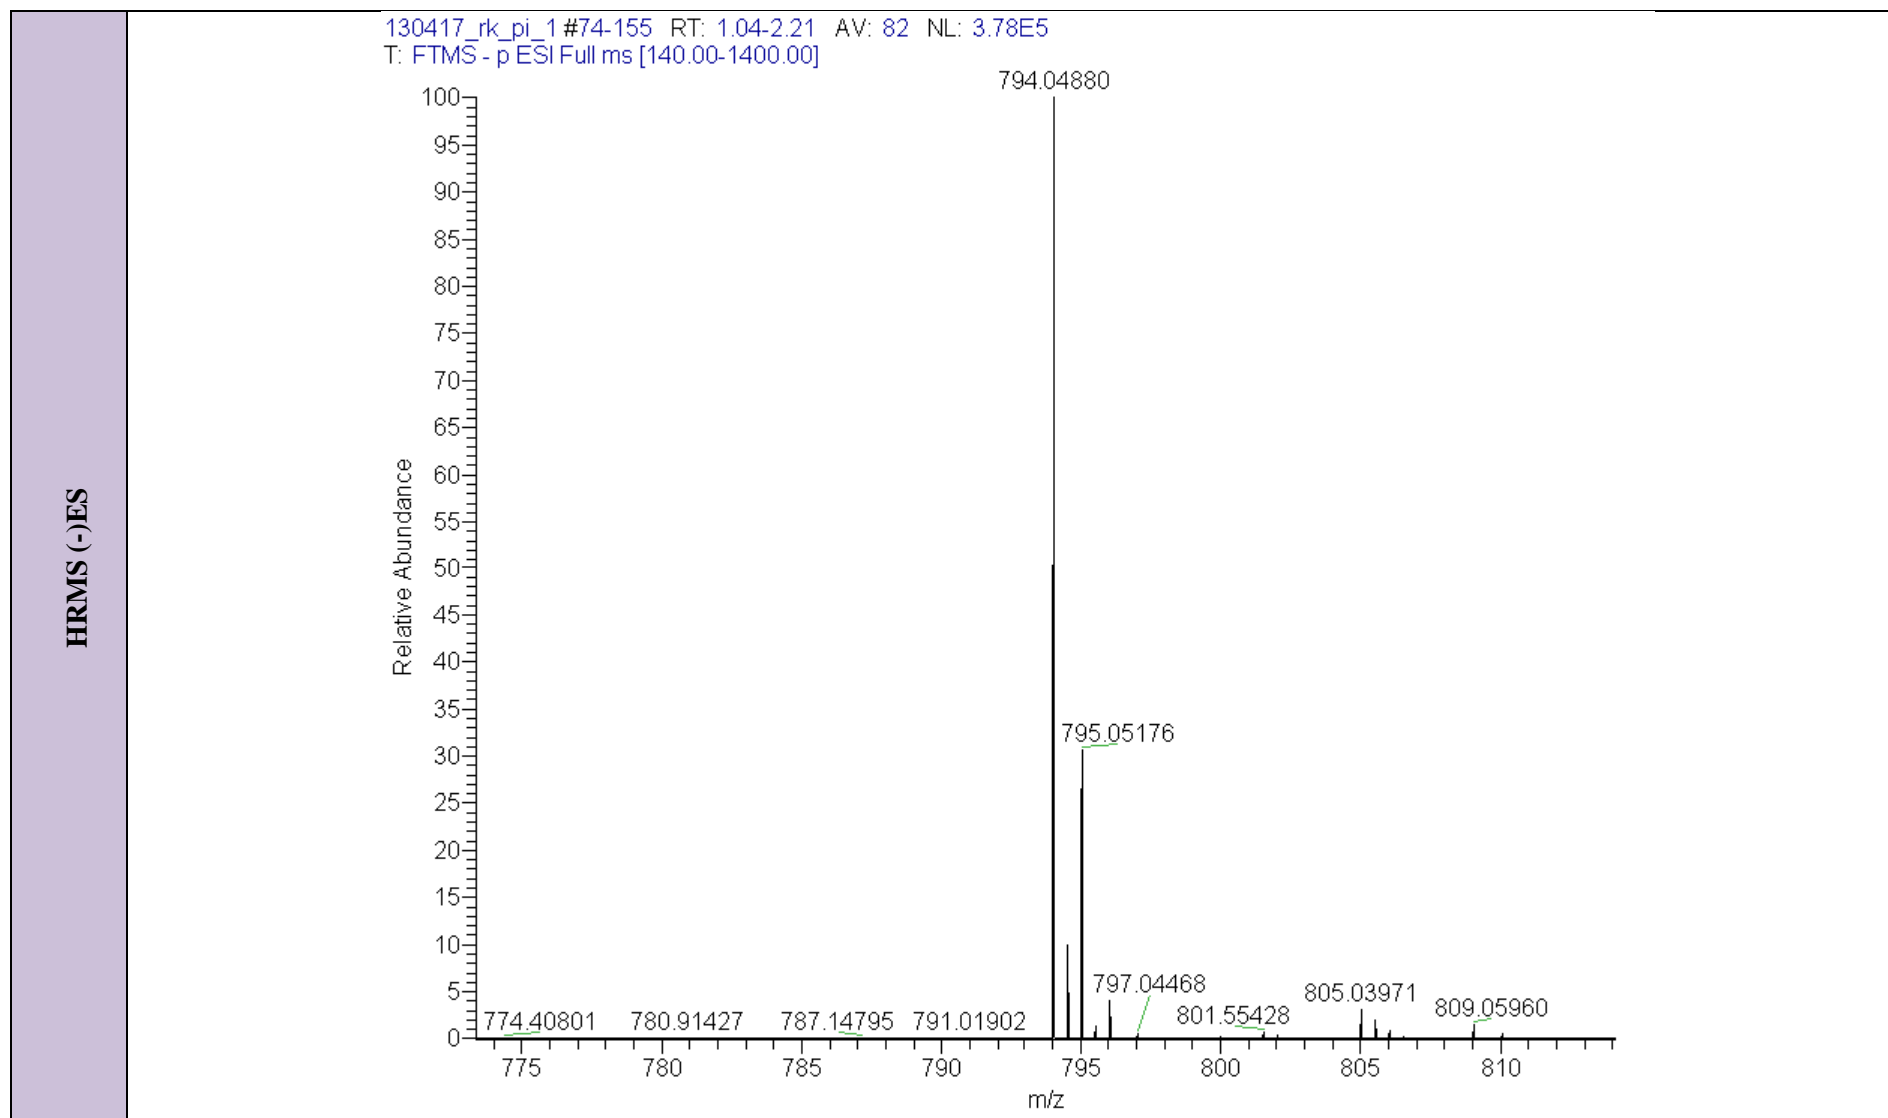

$^1\text{H}$  NMR (500 MHz,  $\text{D}_2\text{O}$ , 25°C)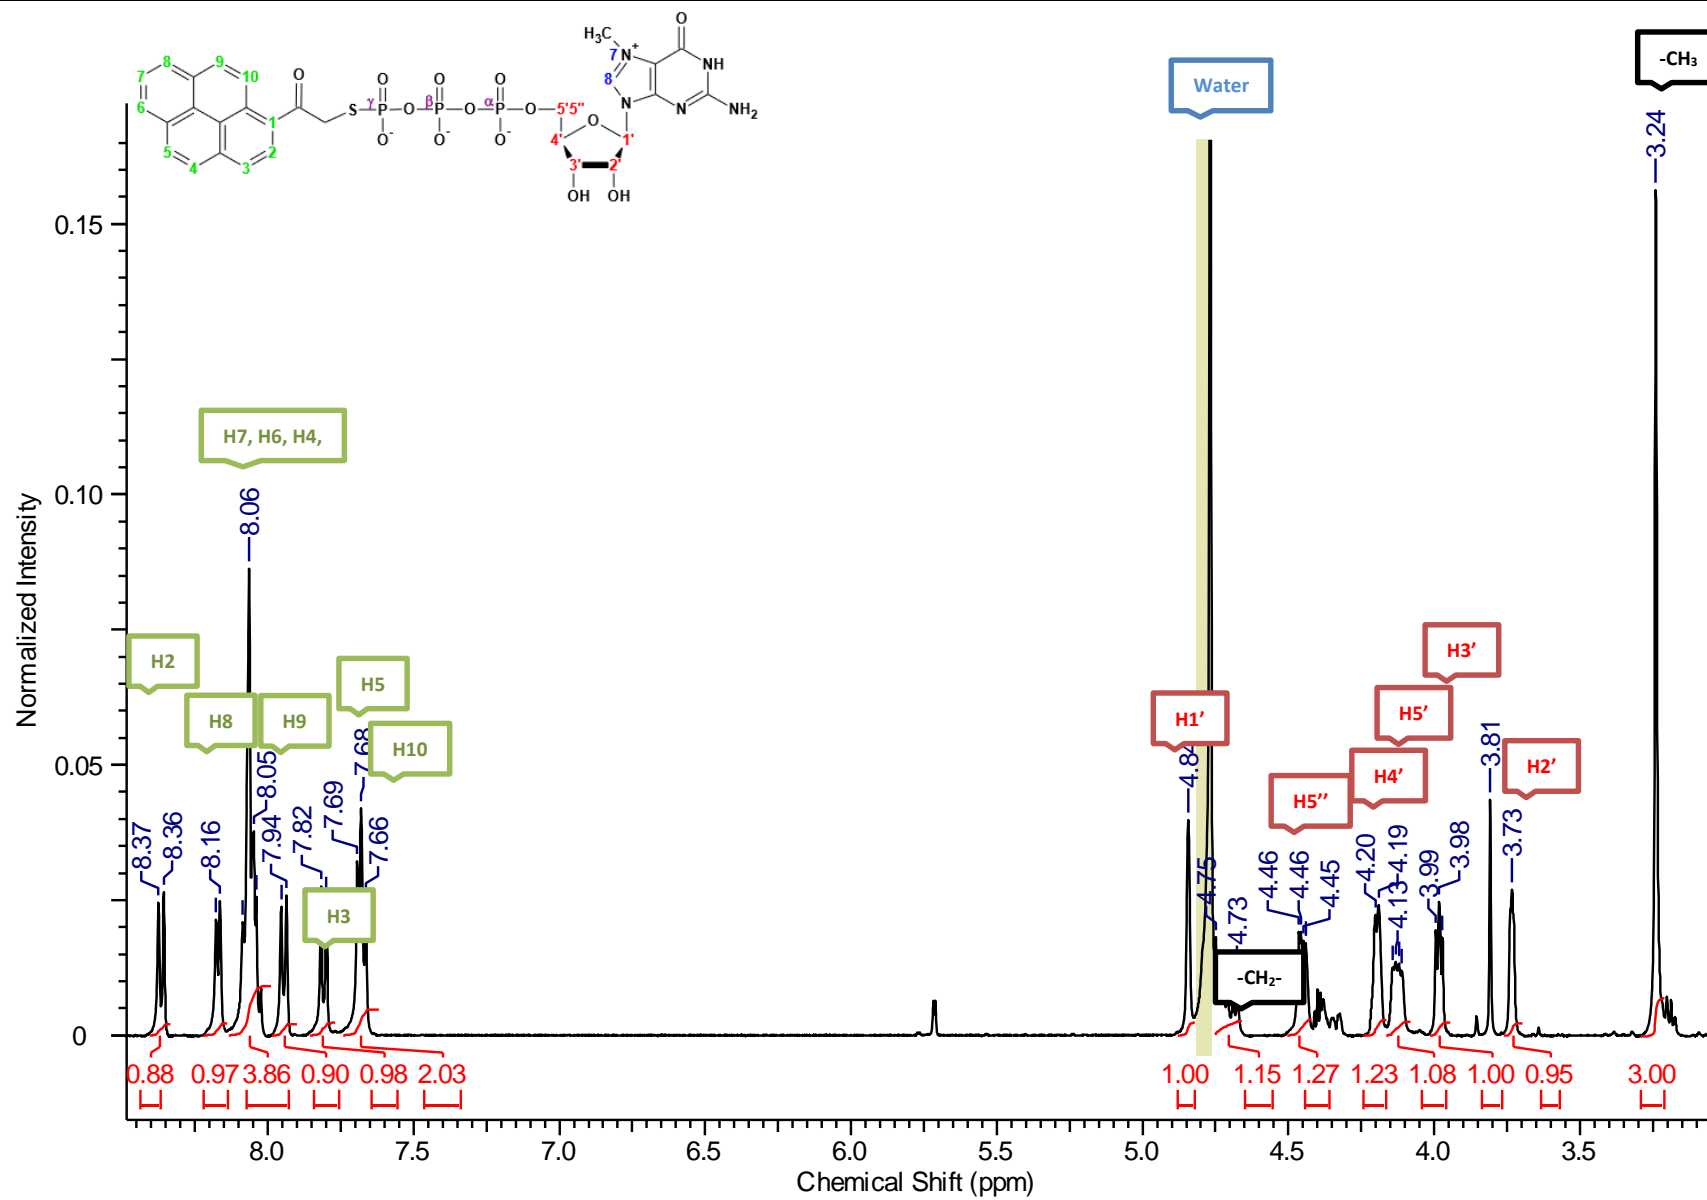

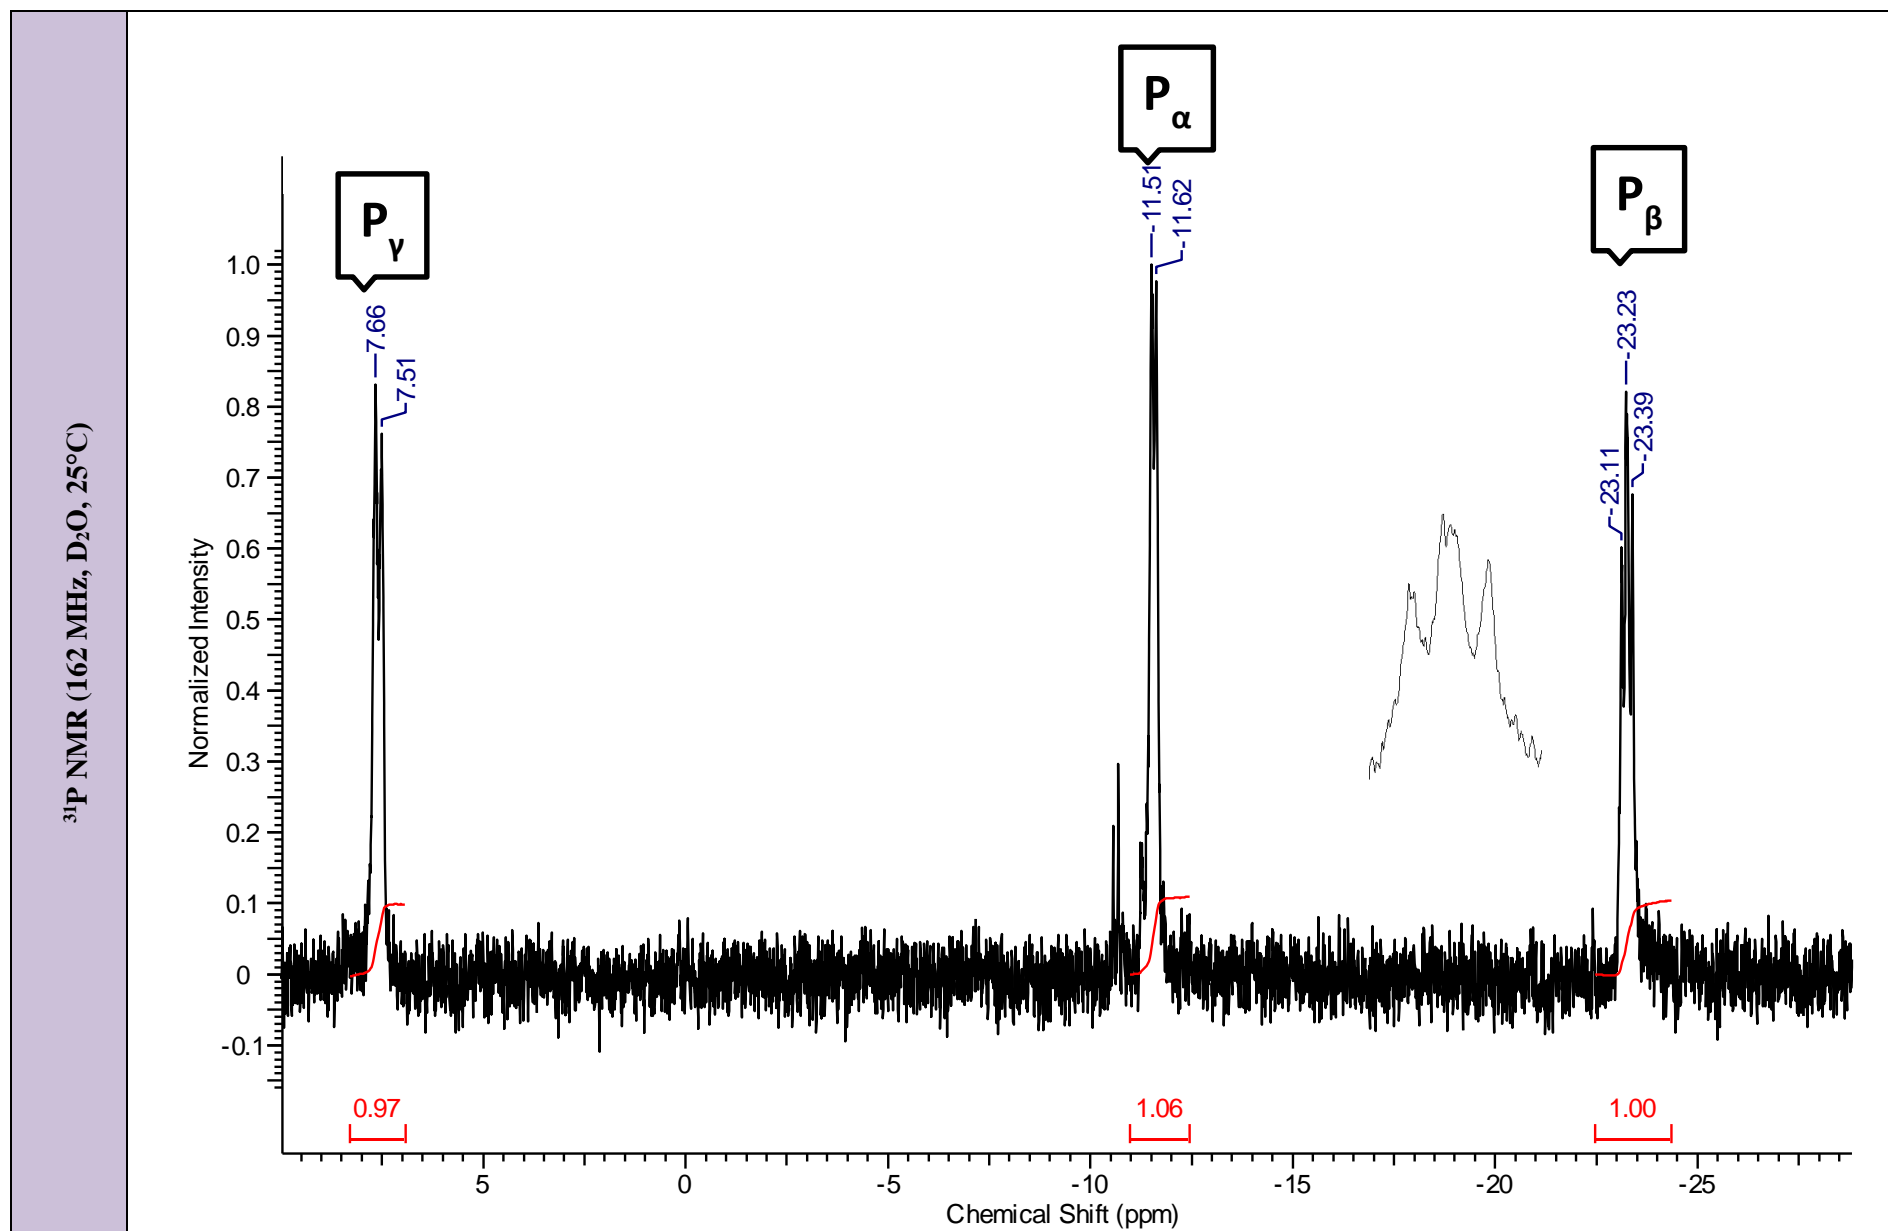

2D TOCSY NMR (500 MHz, D<sub>2</sub>O, 25°C)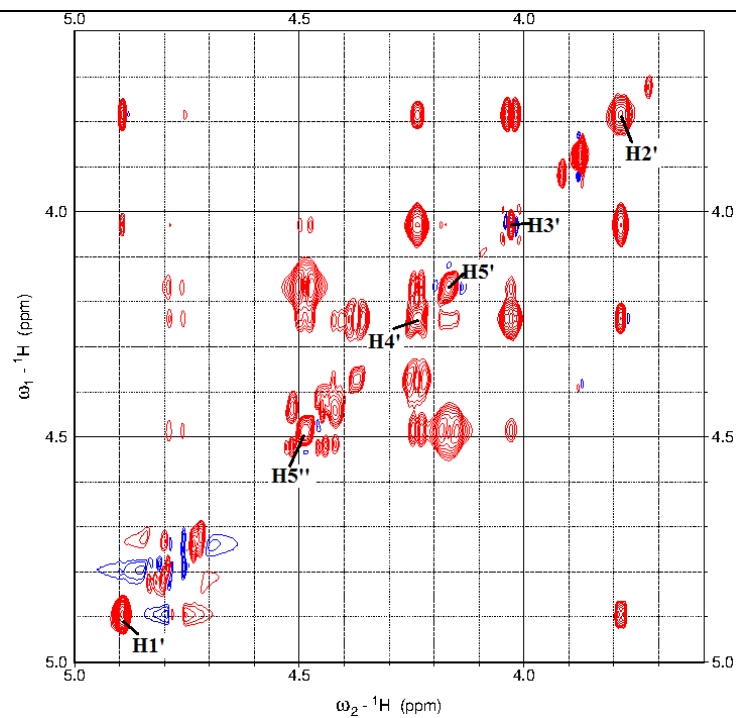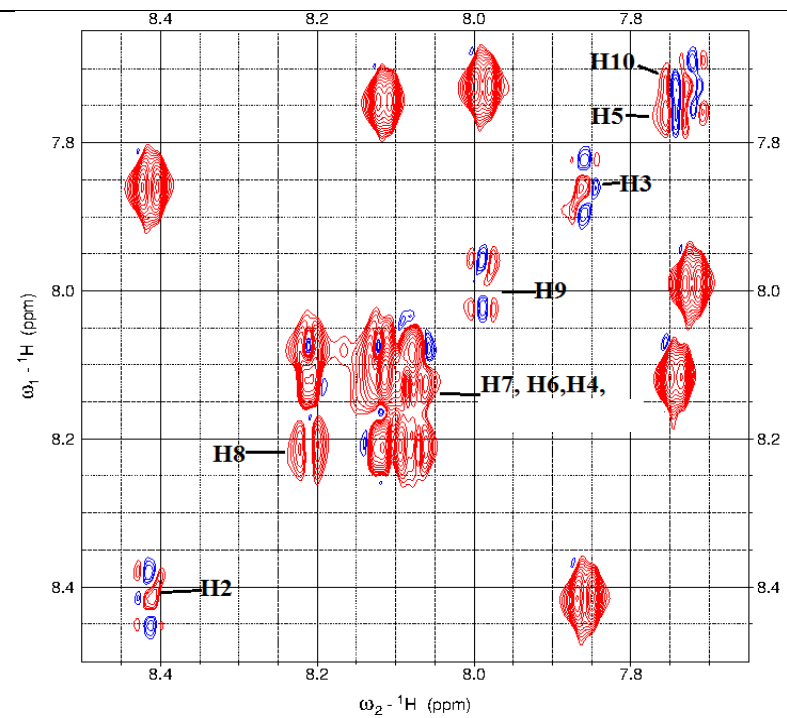

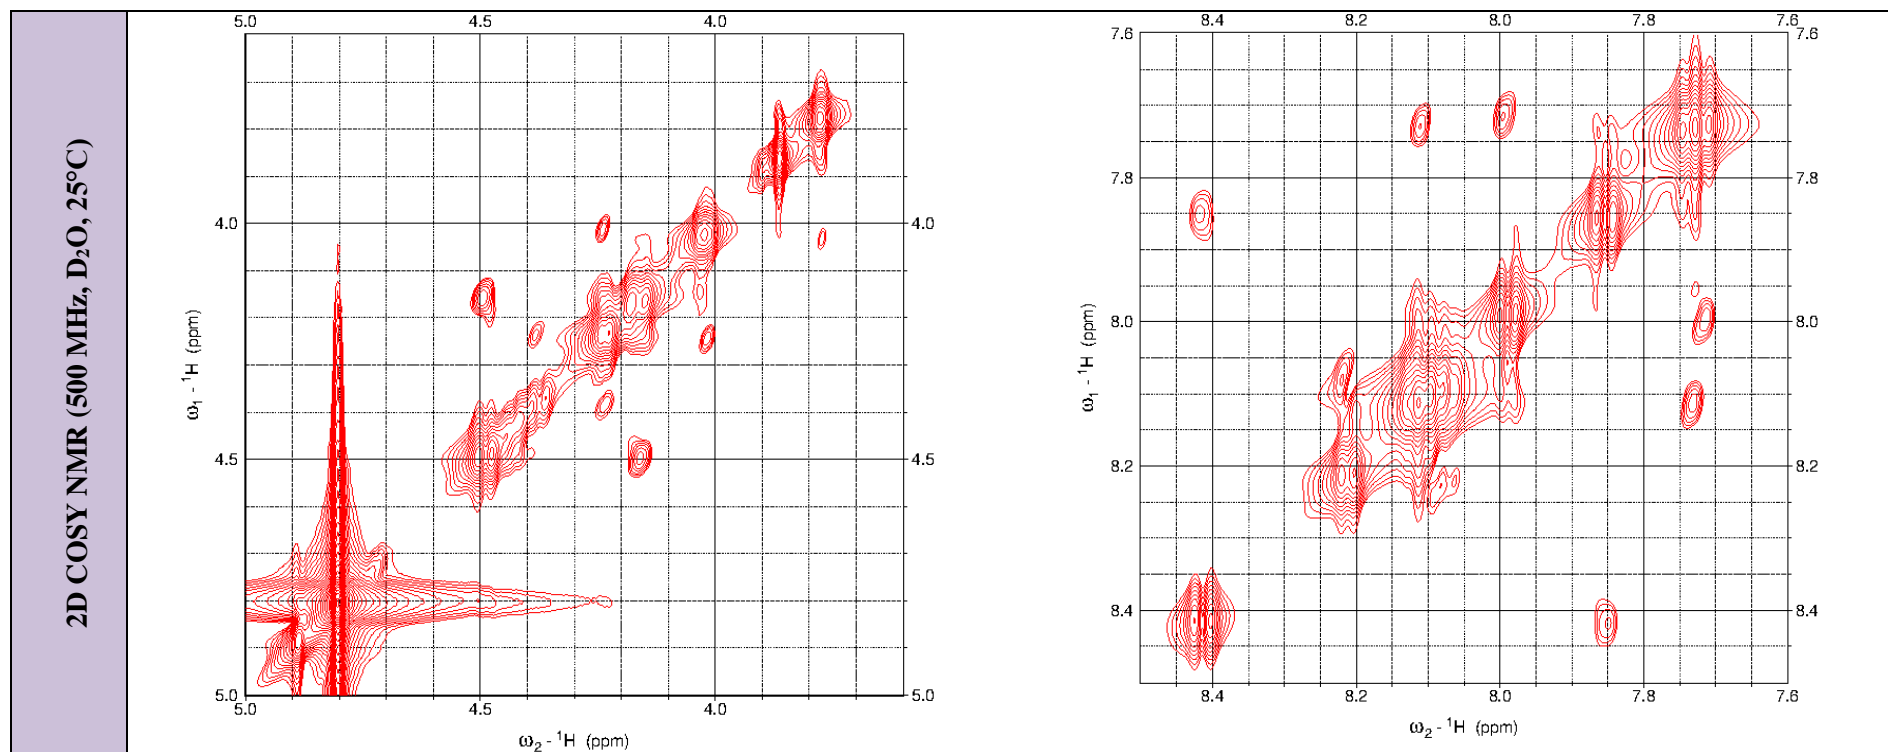

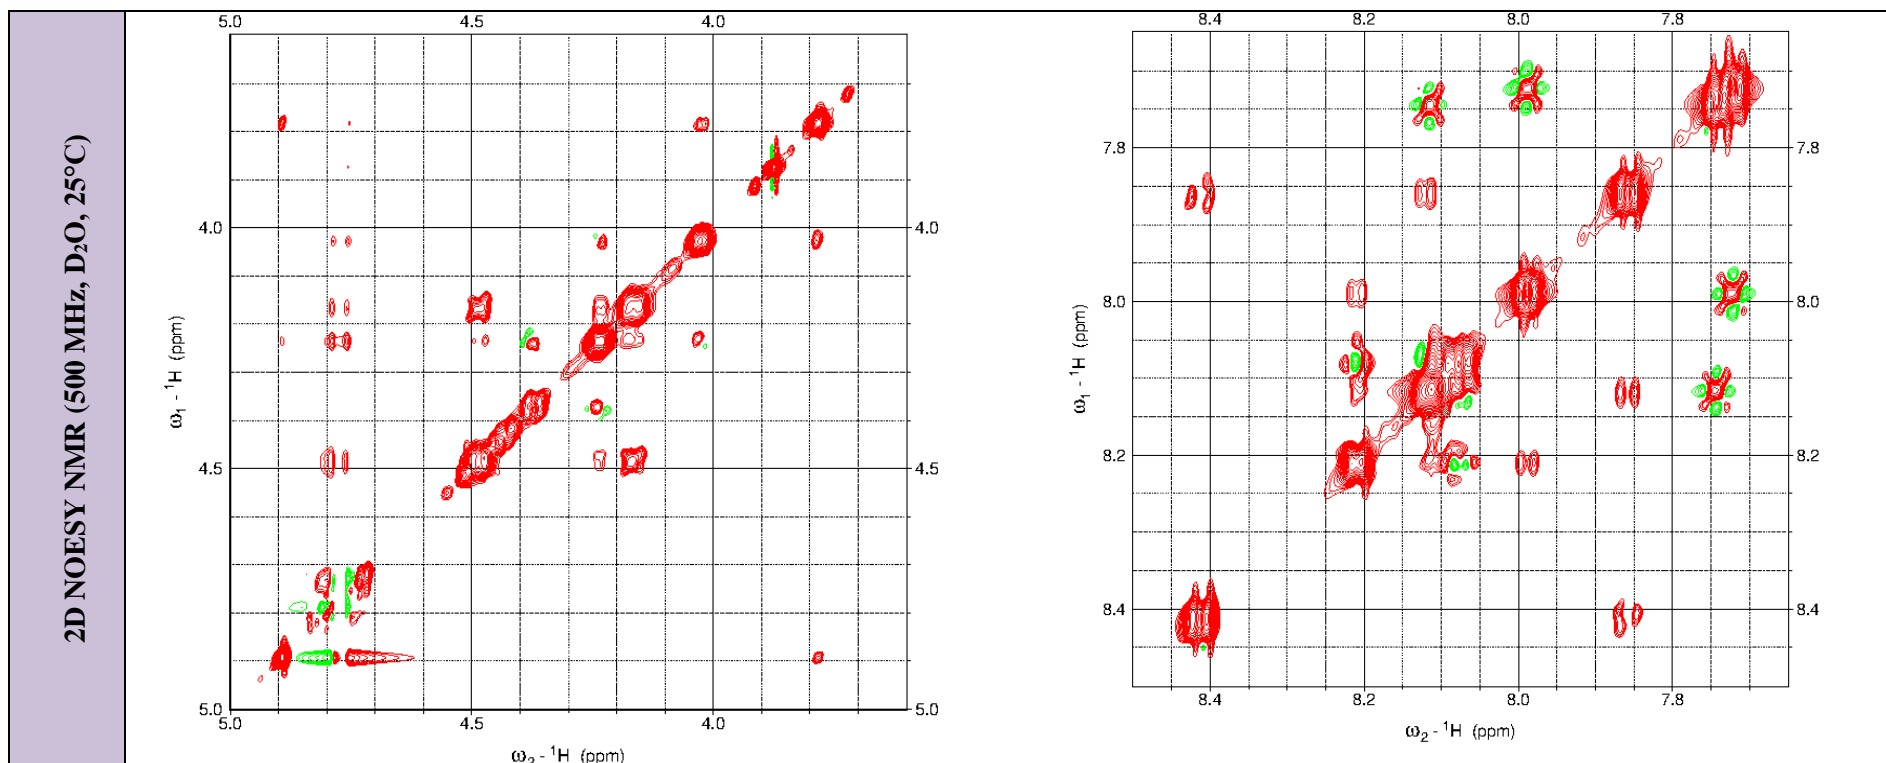



2D ROESy NMR (500 MHz, D<sub>2</sub>O, 25°C)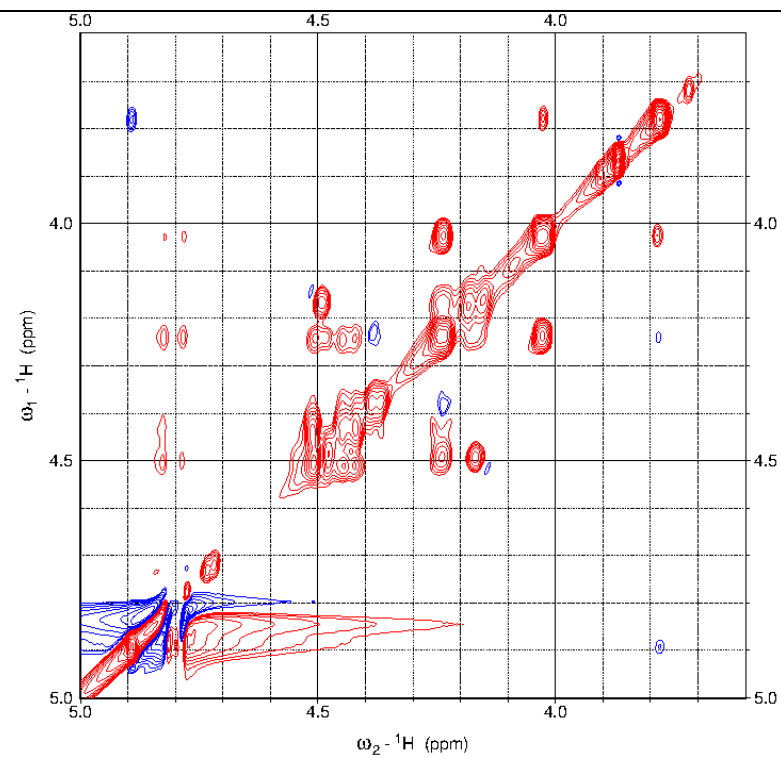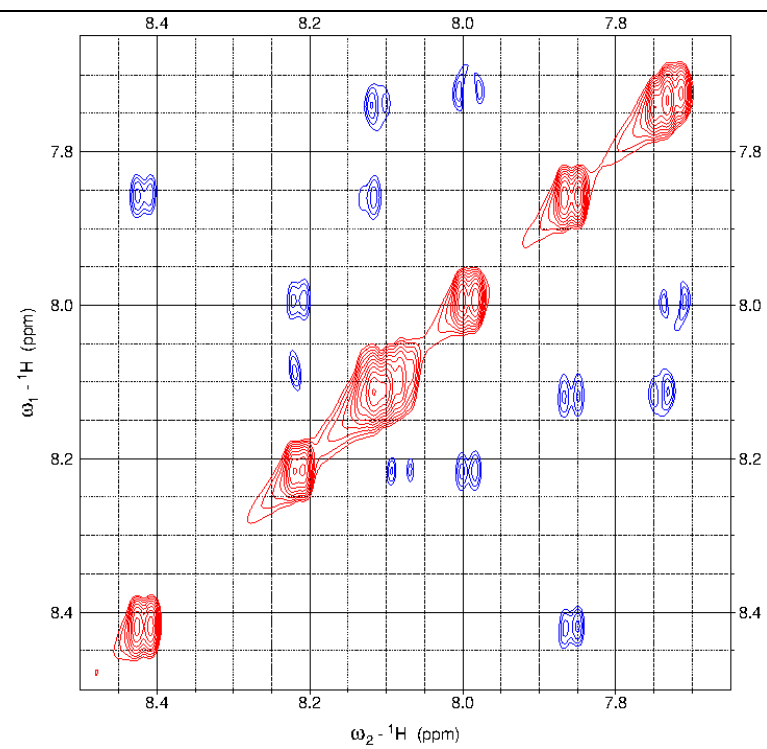

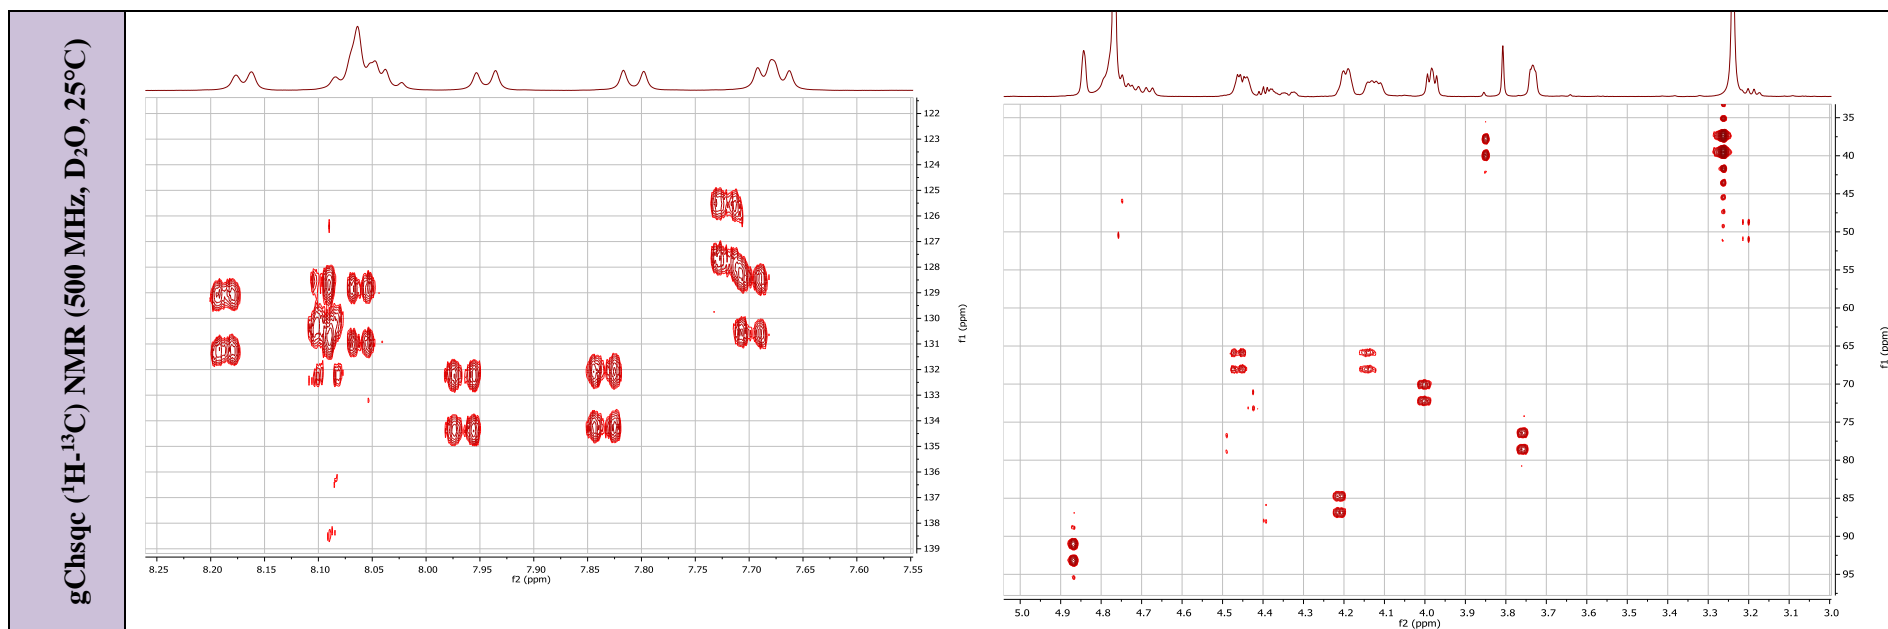

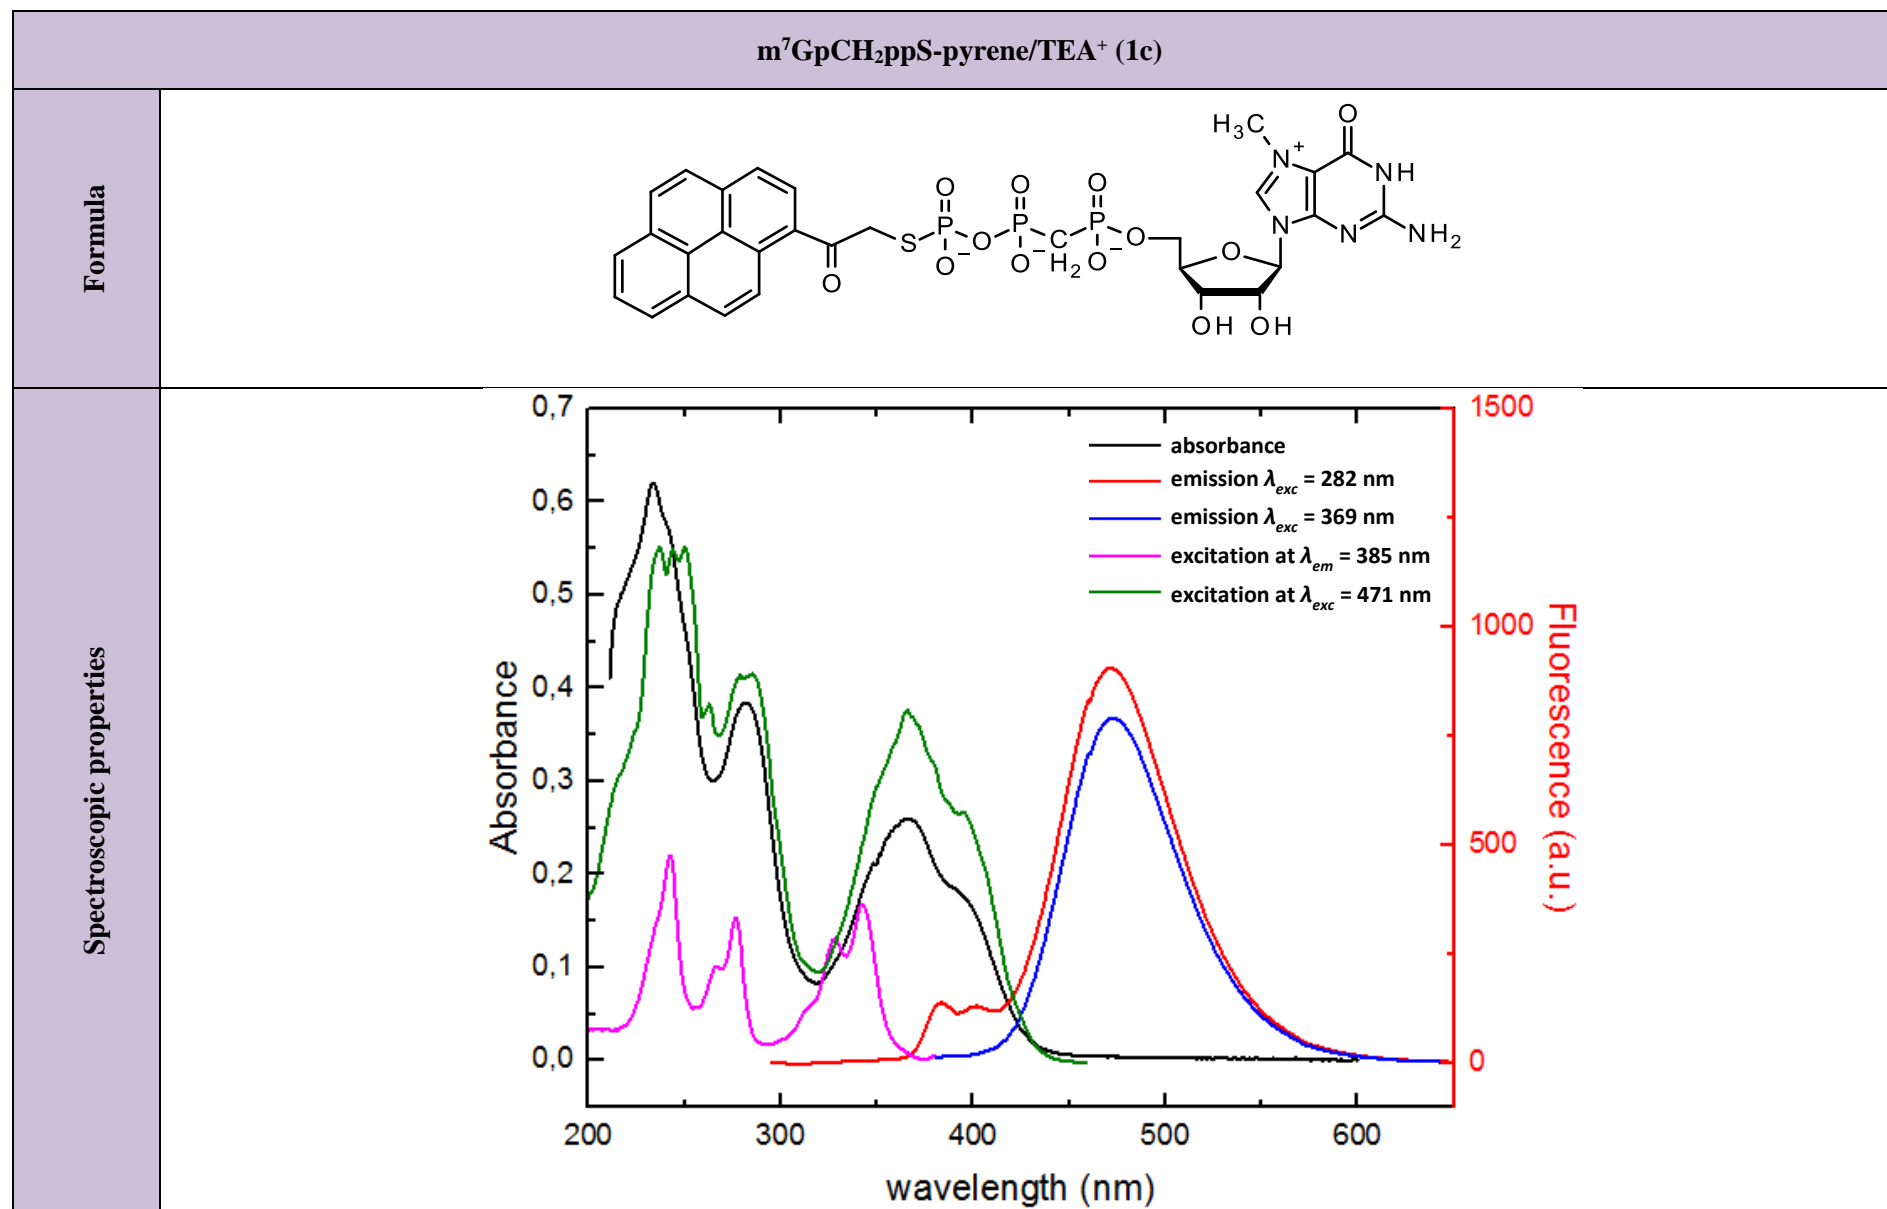

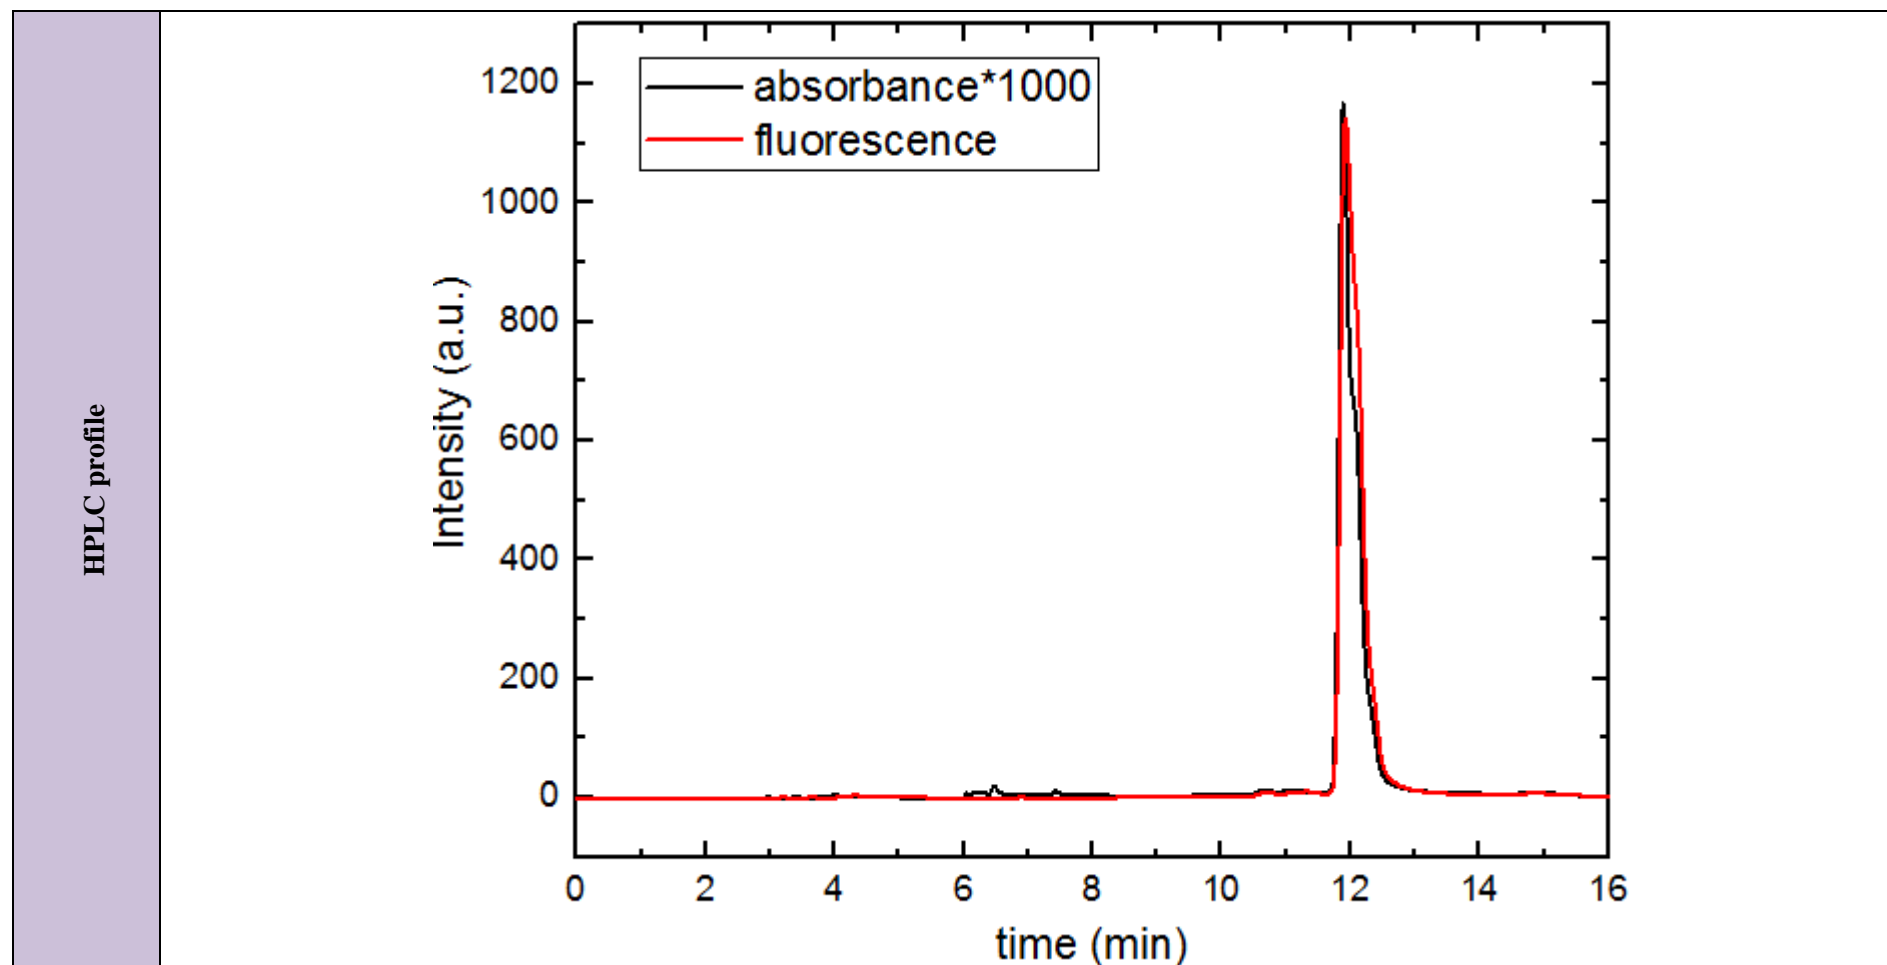

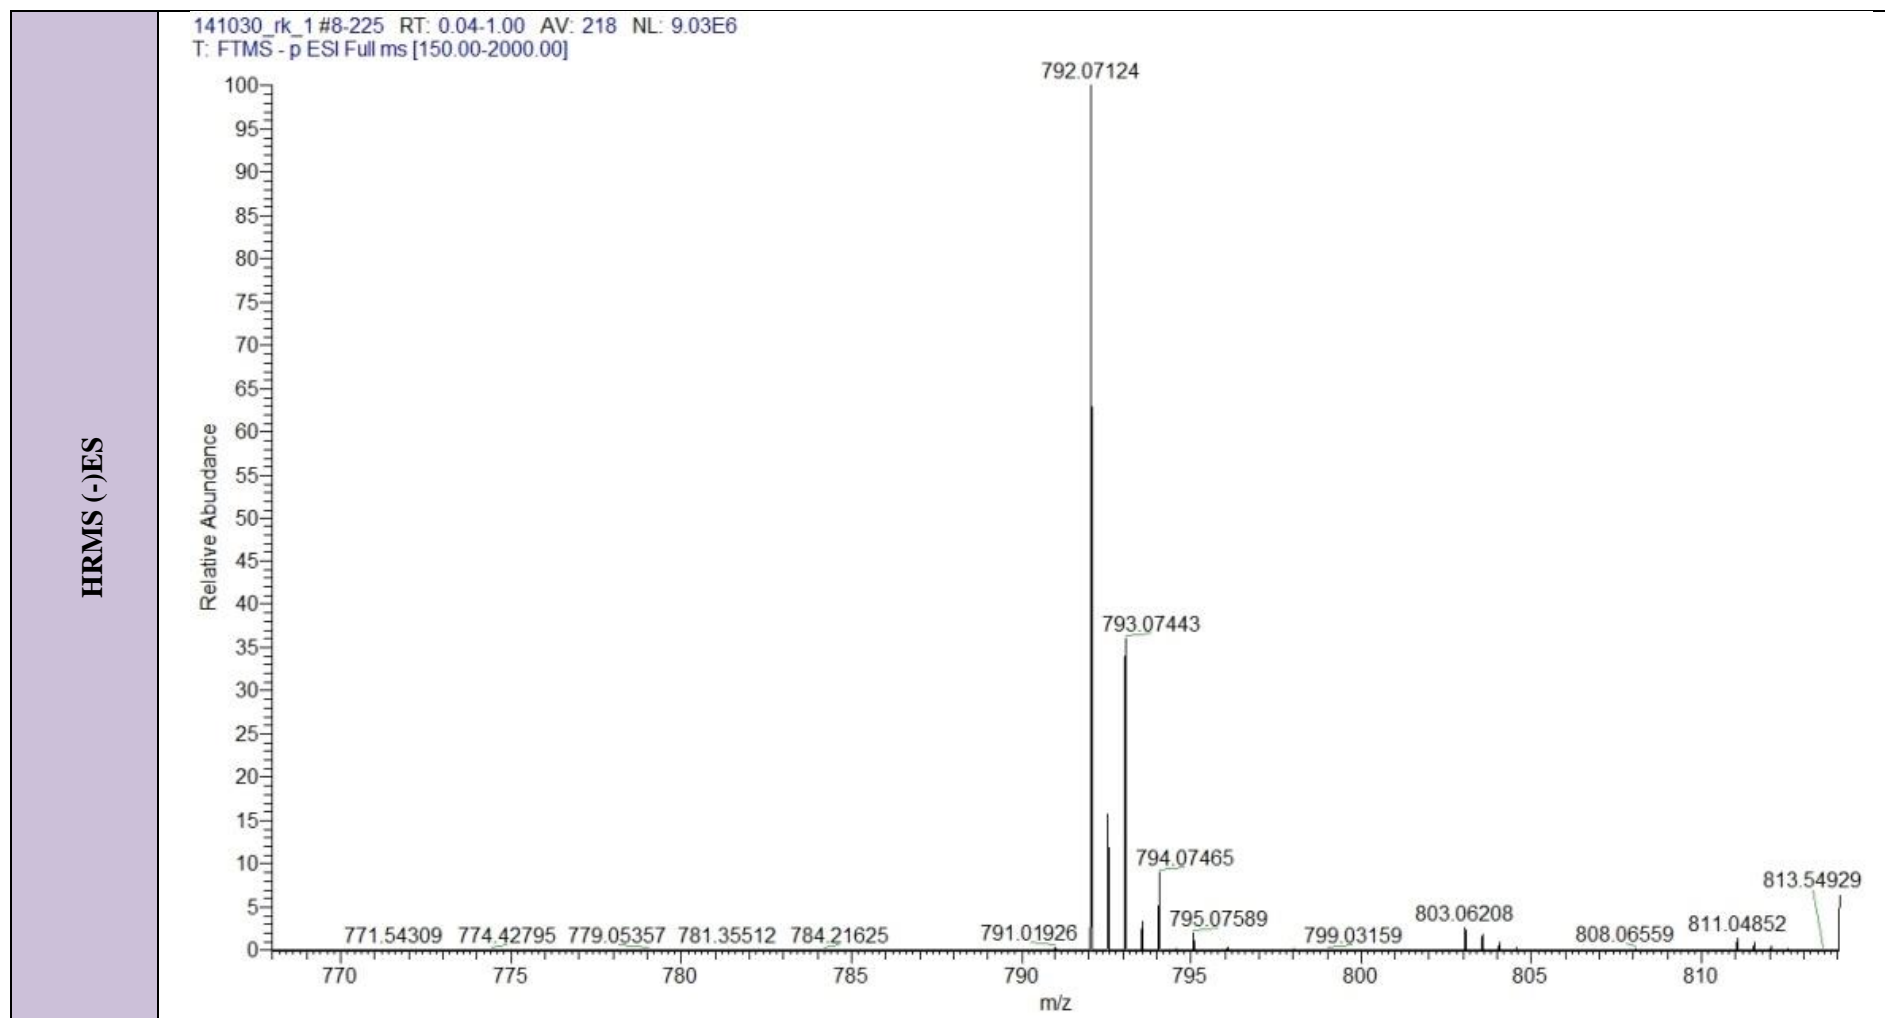

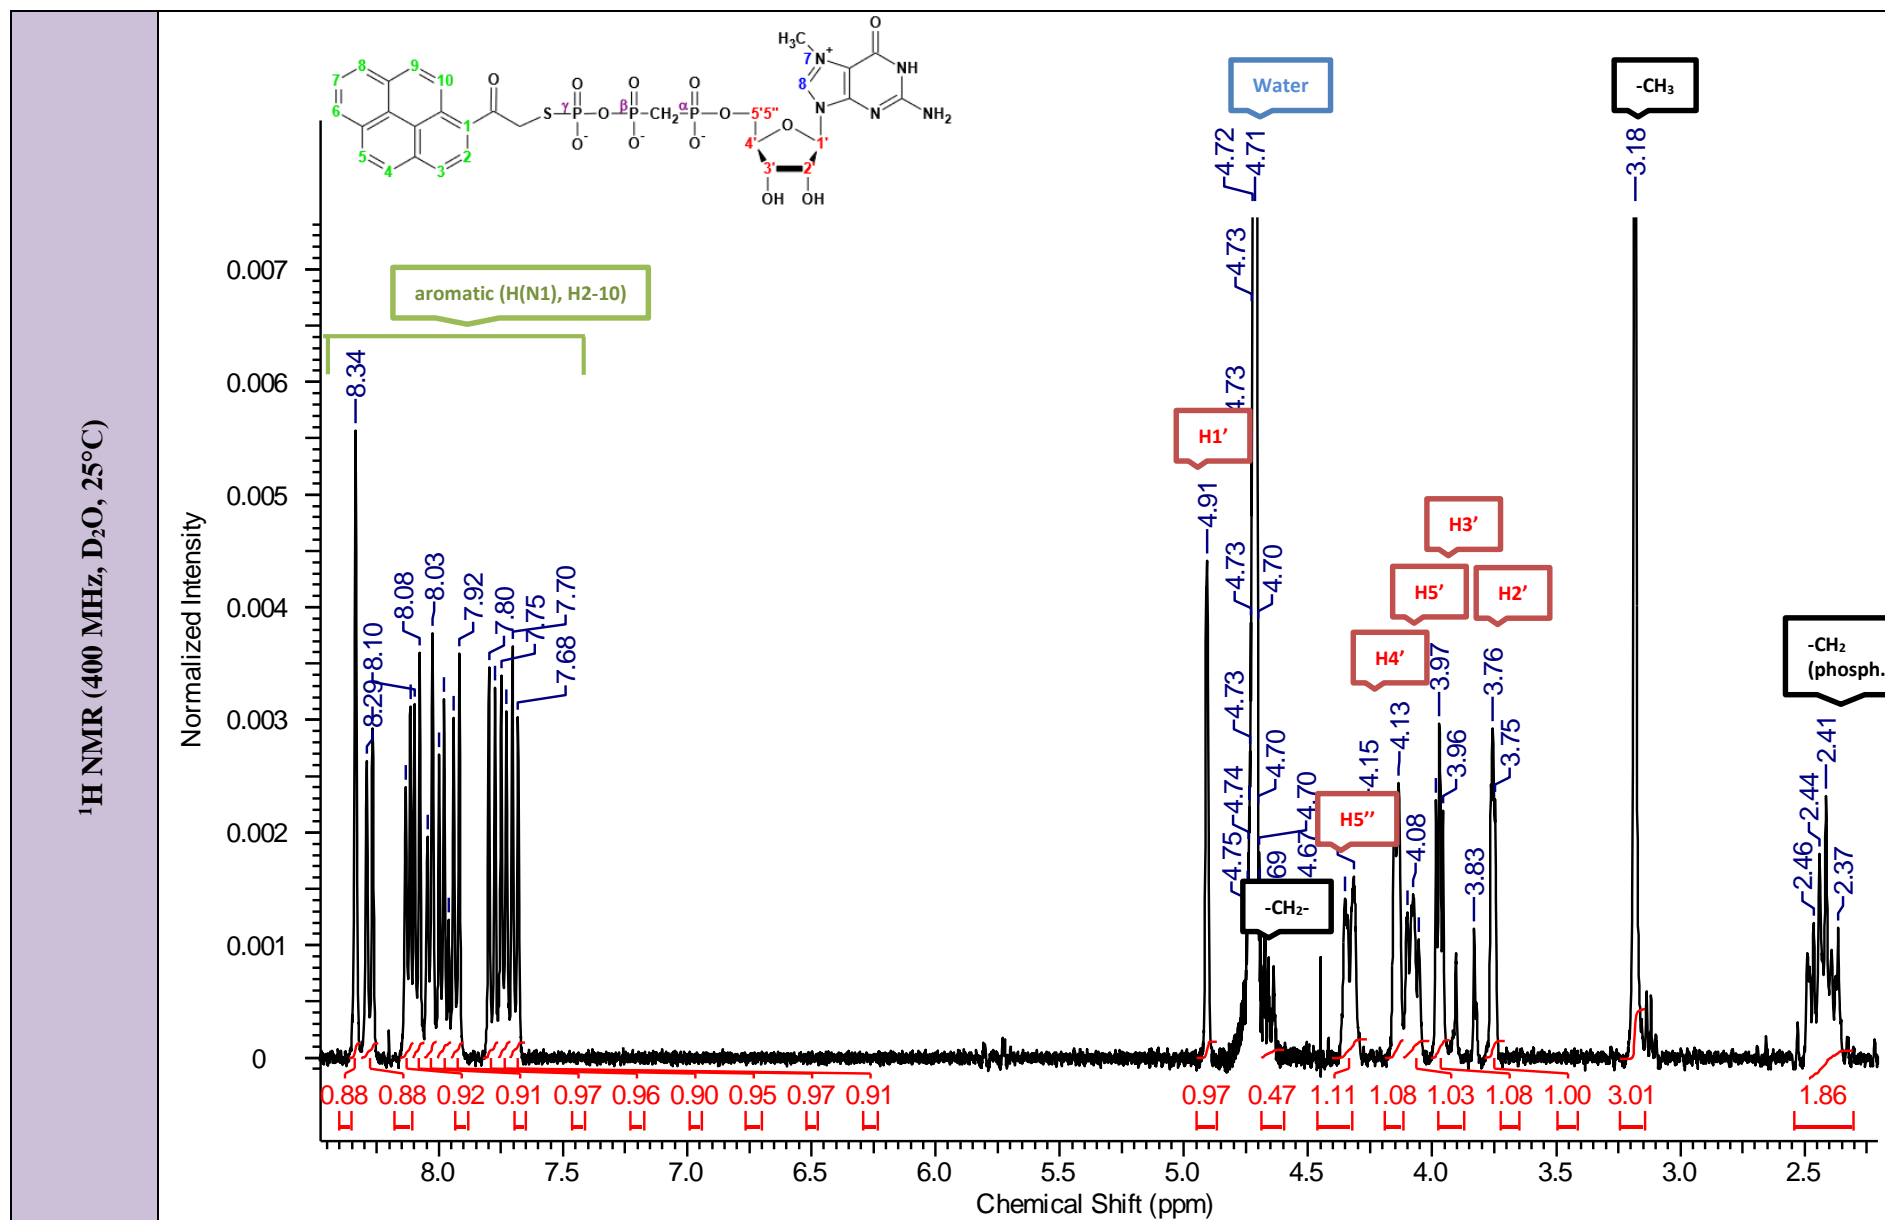

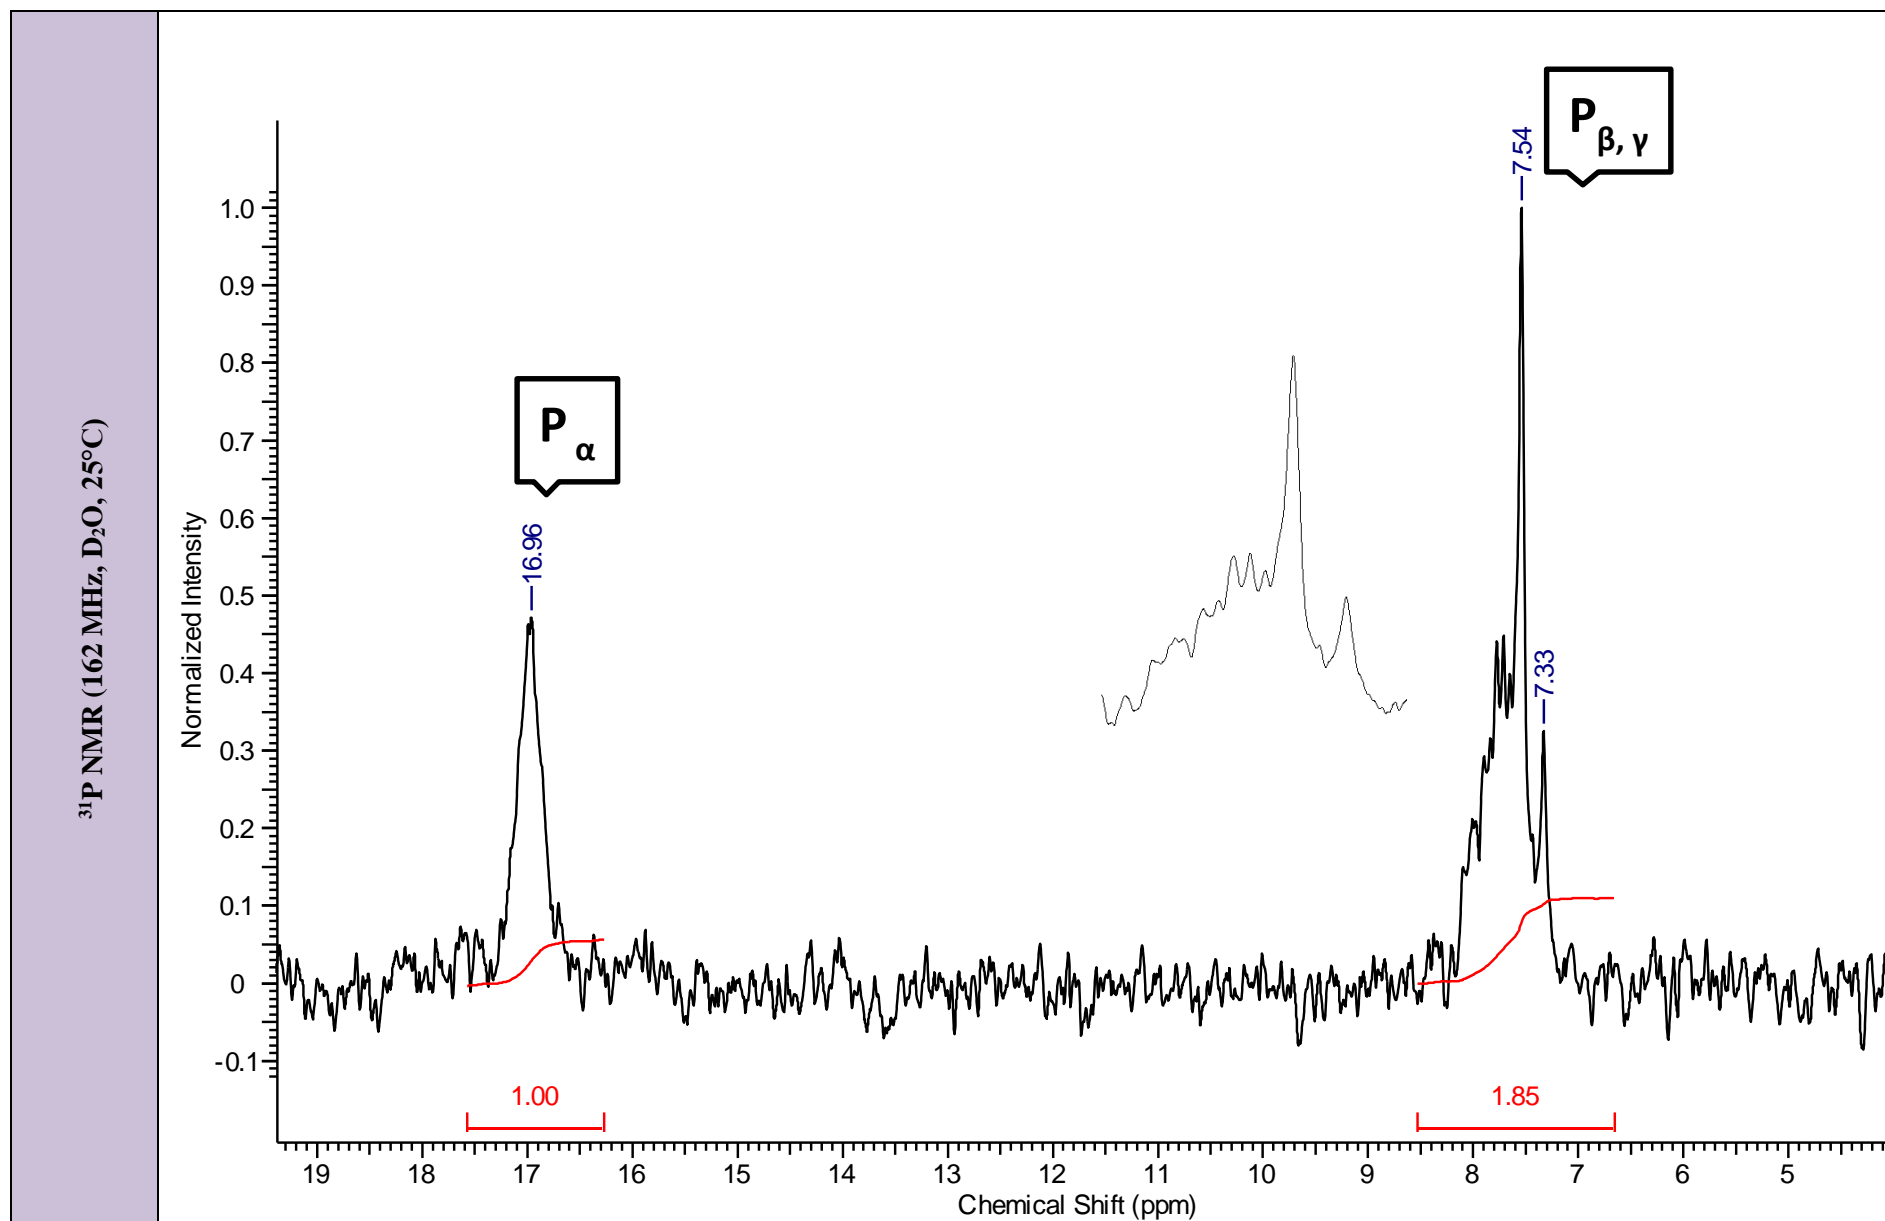

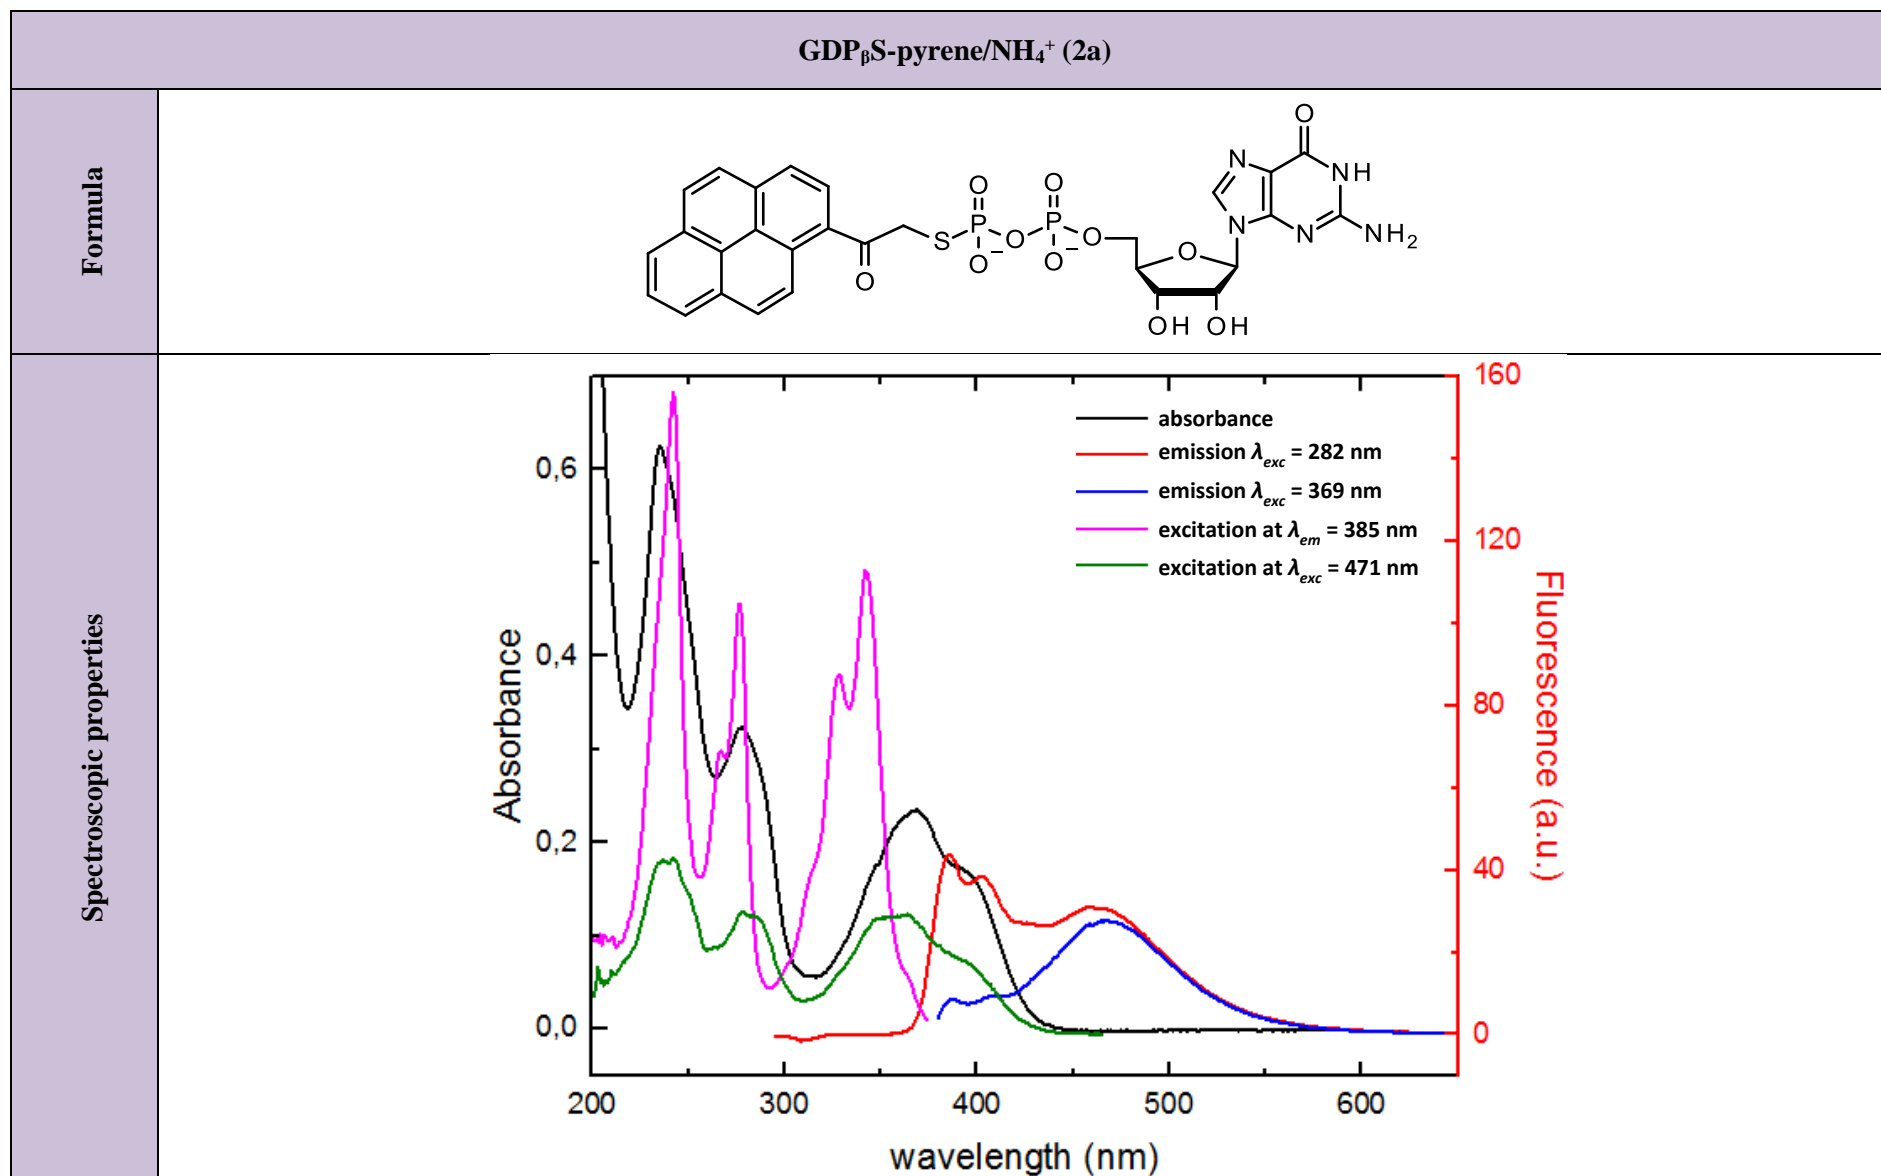



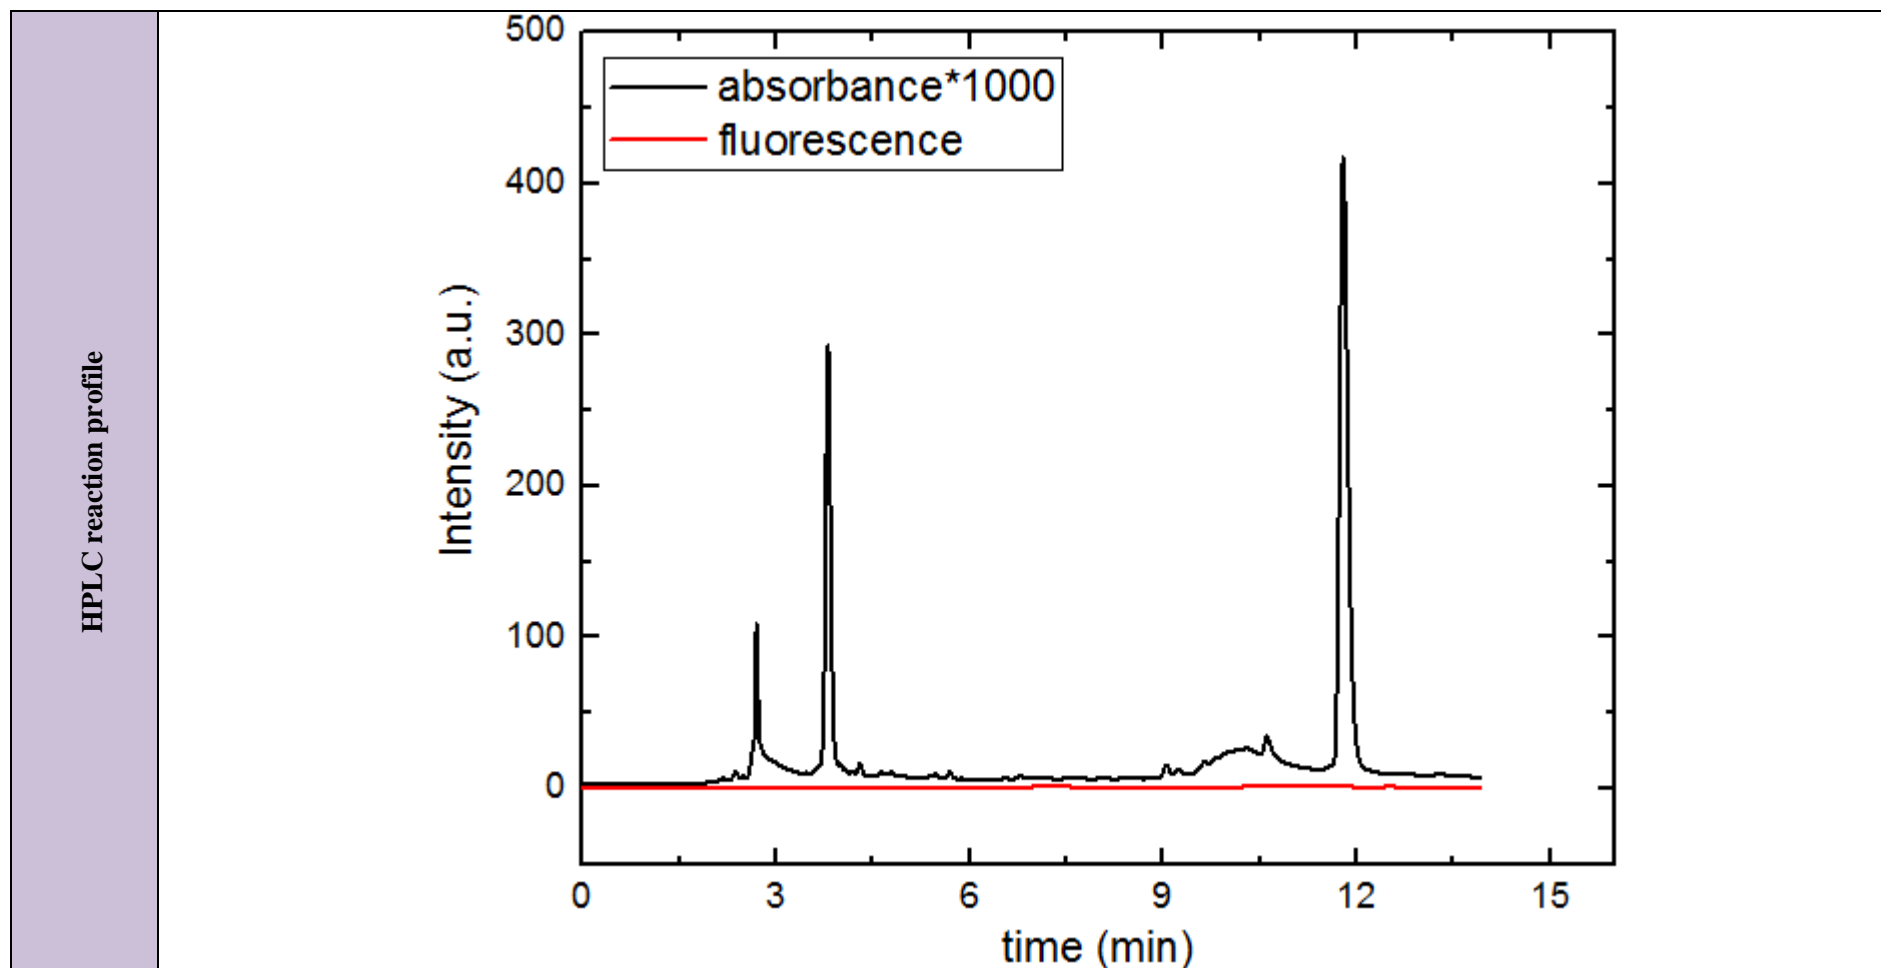

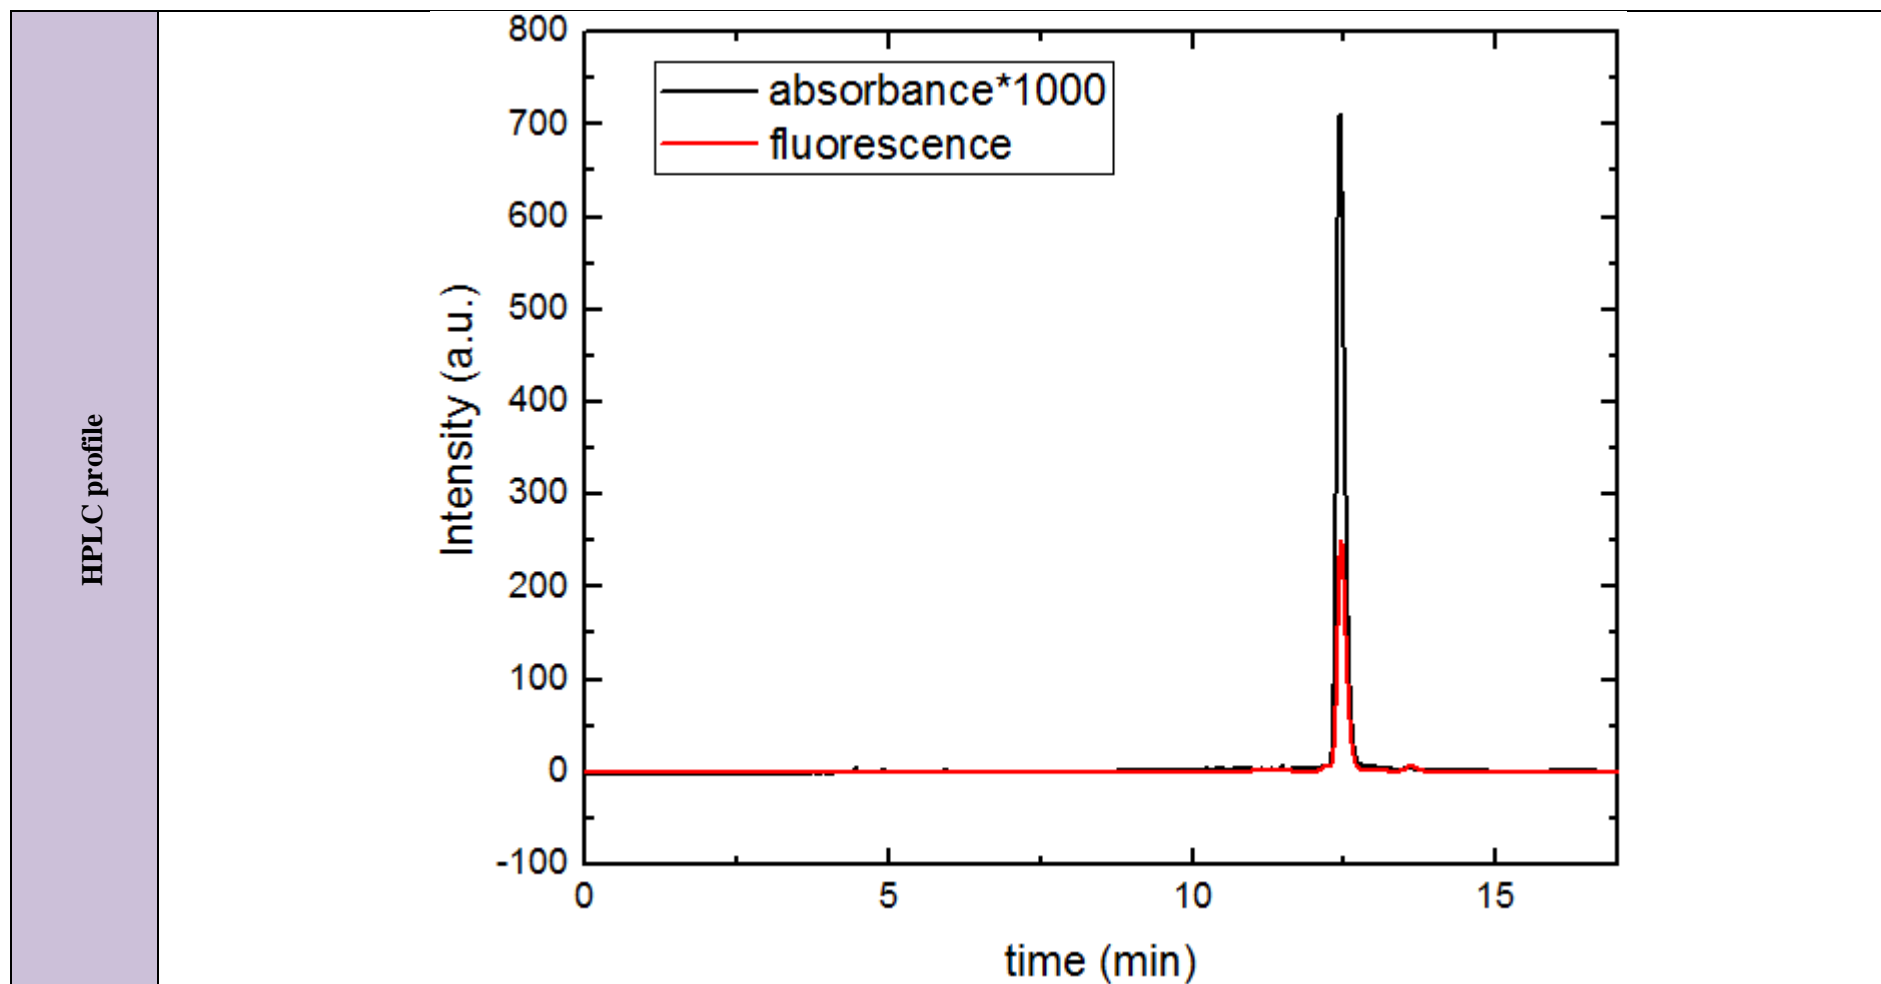

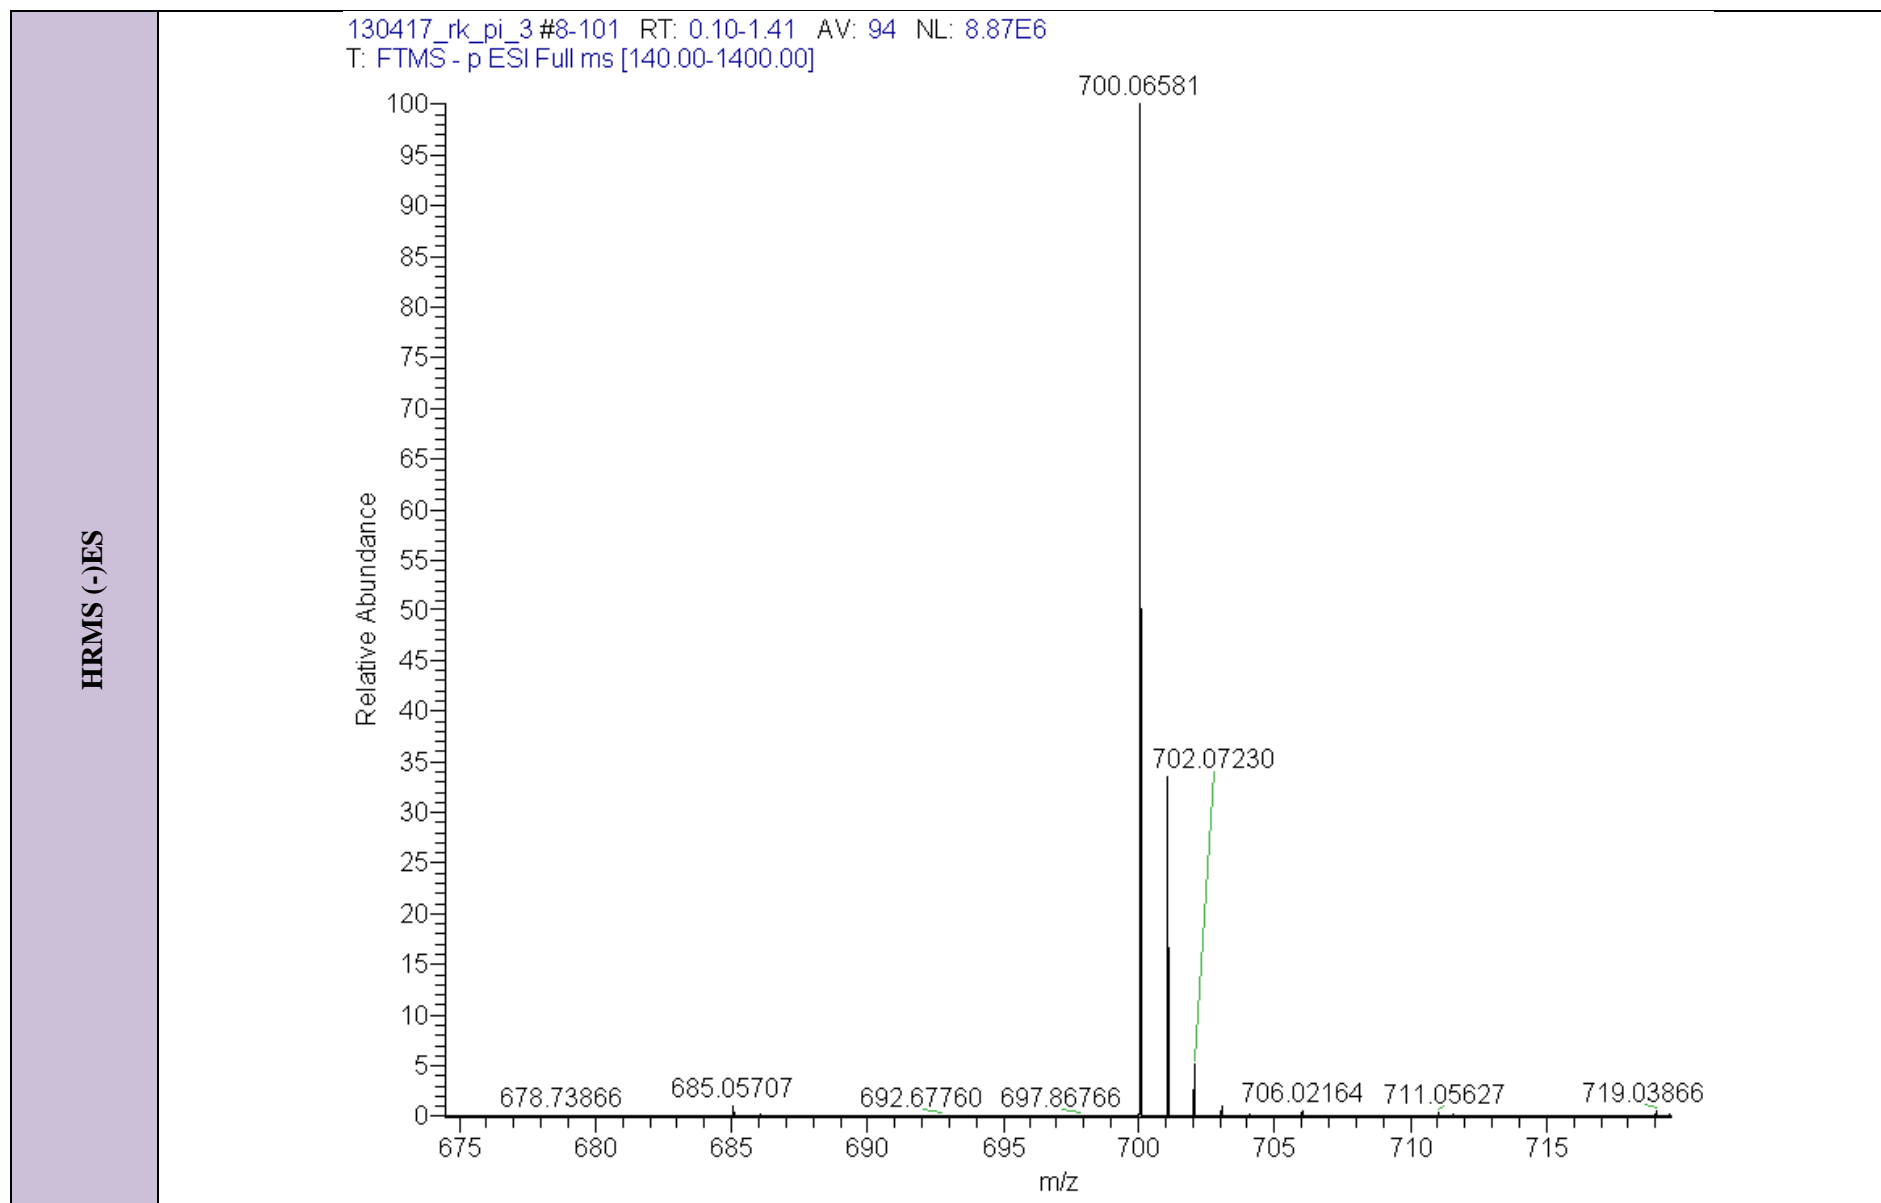

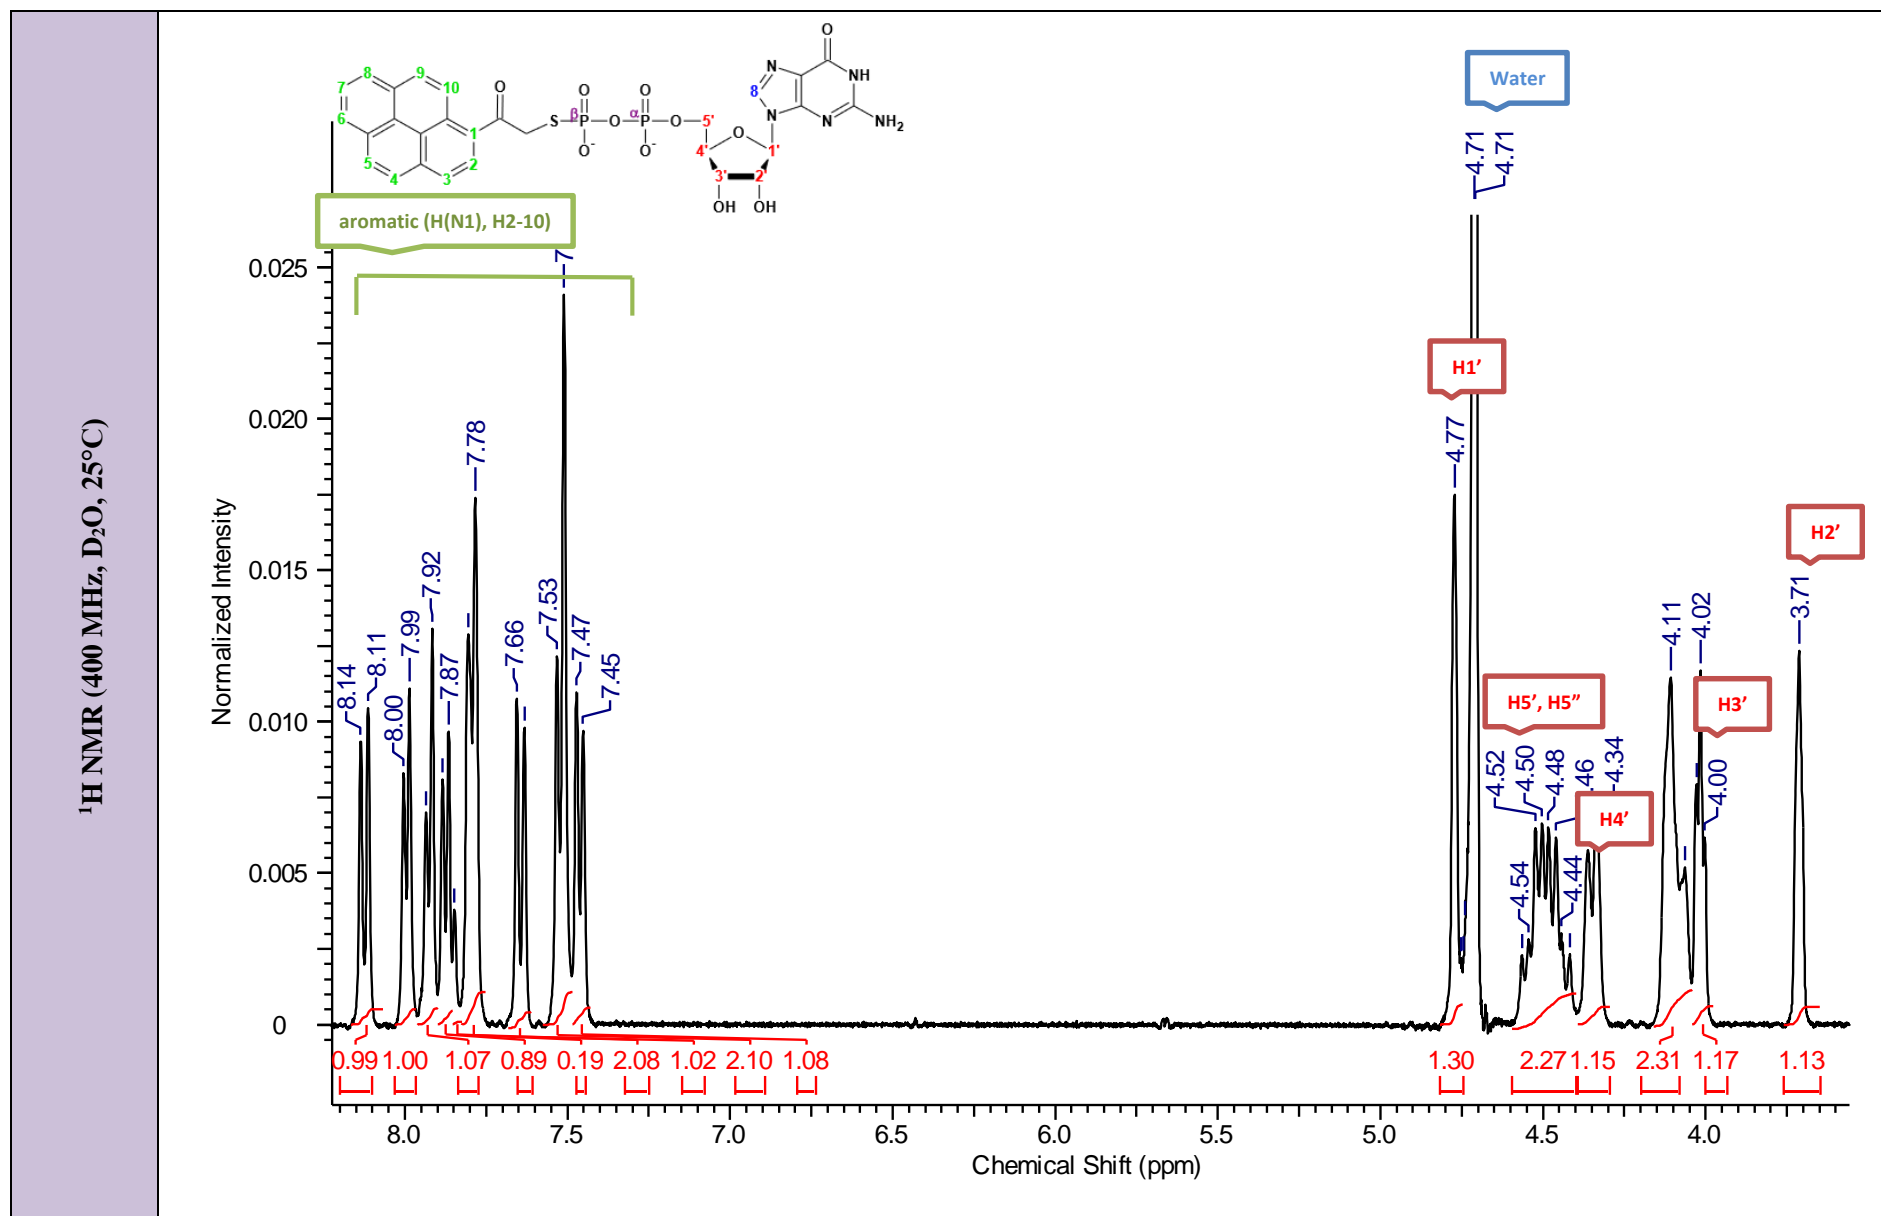

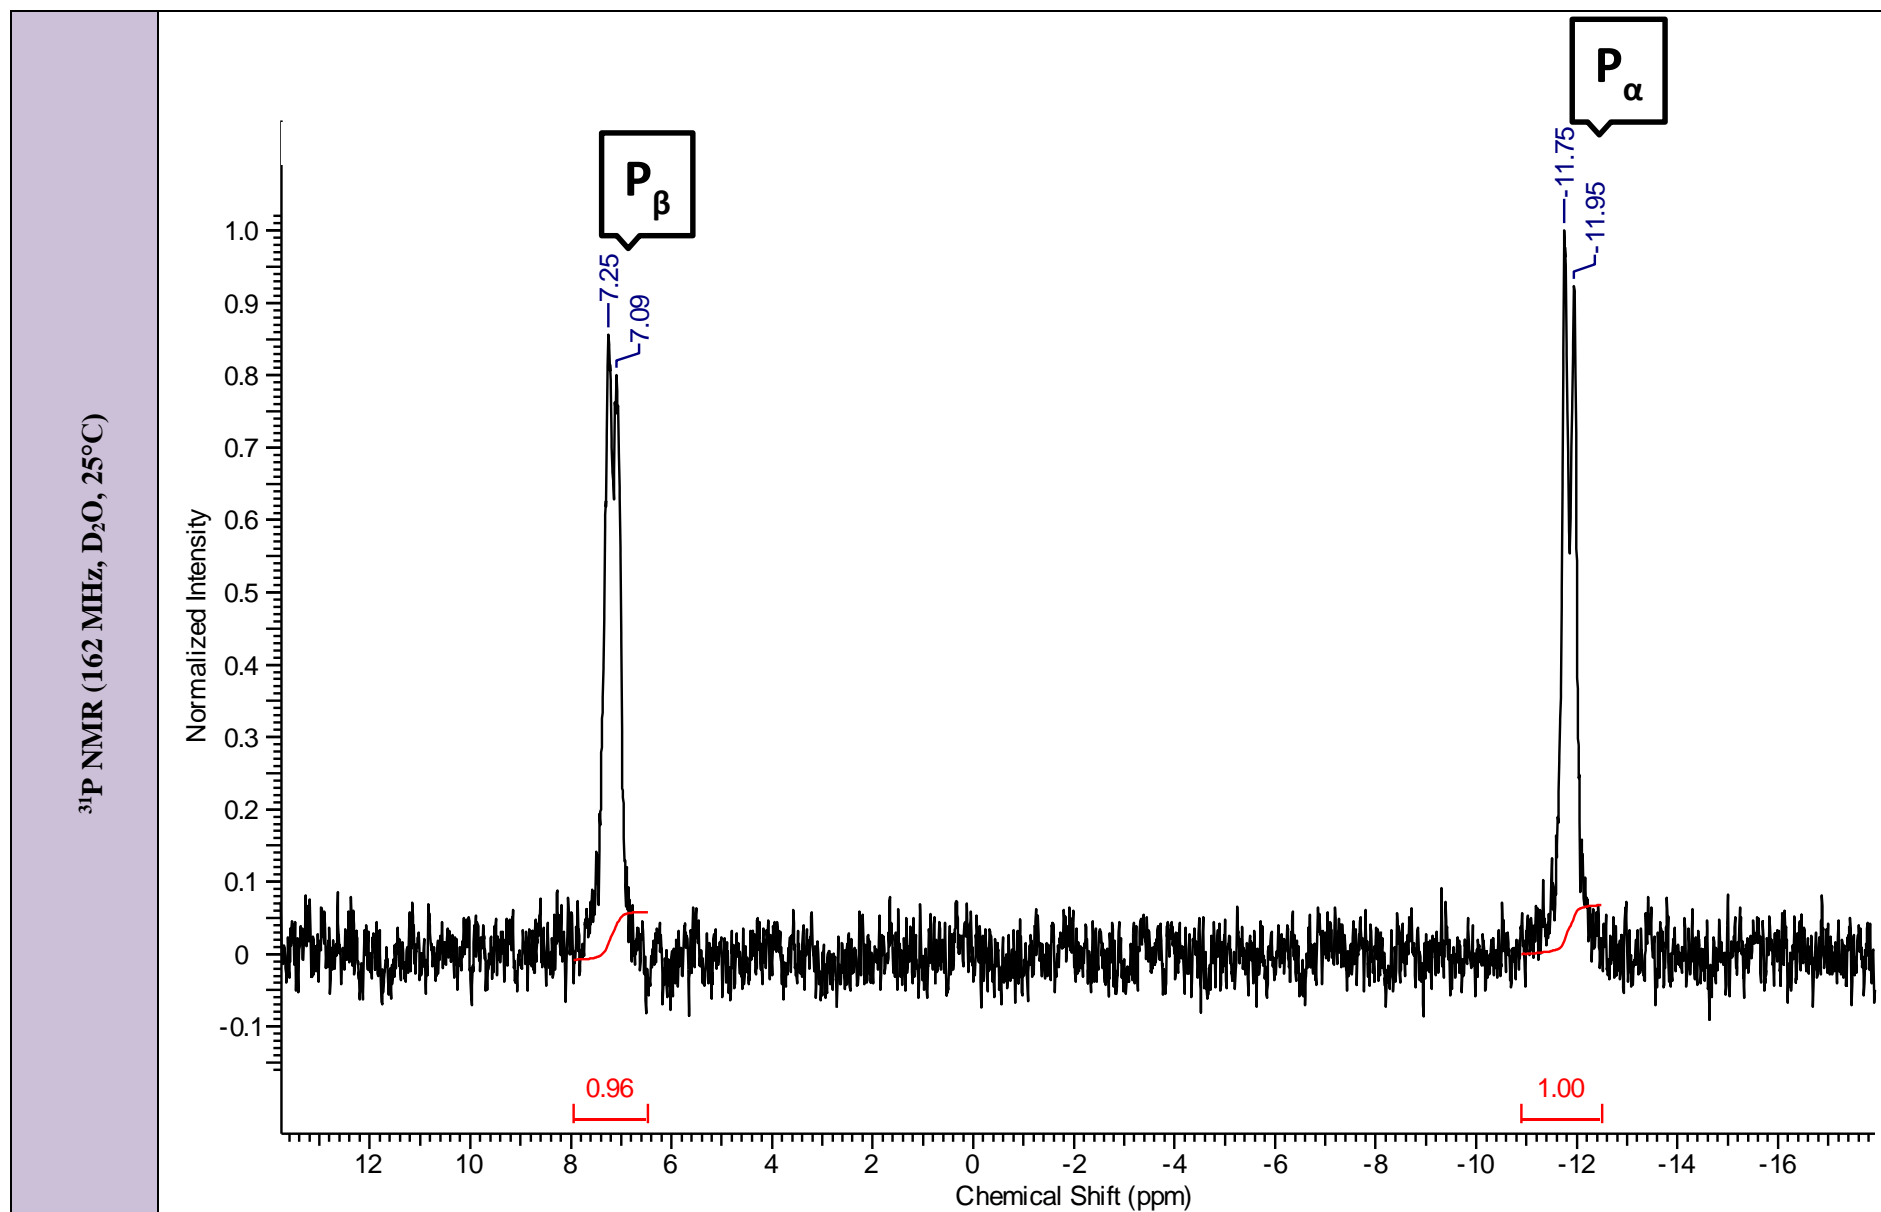

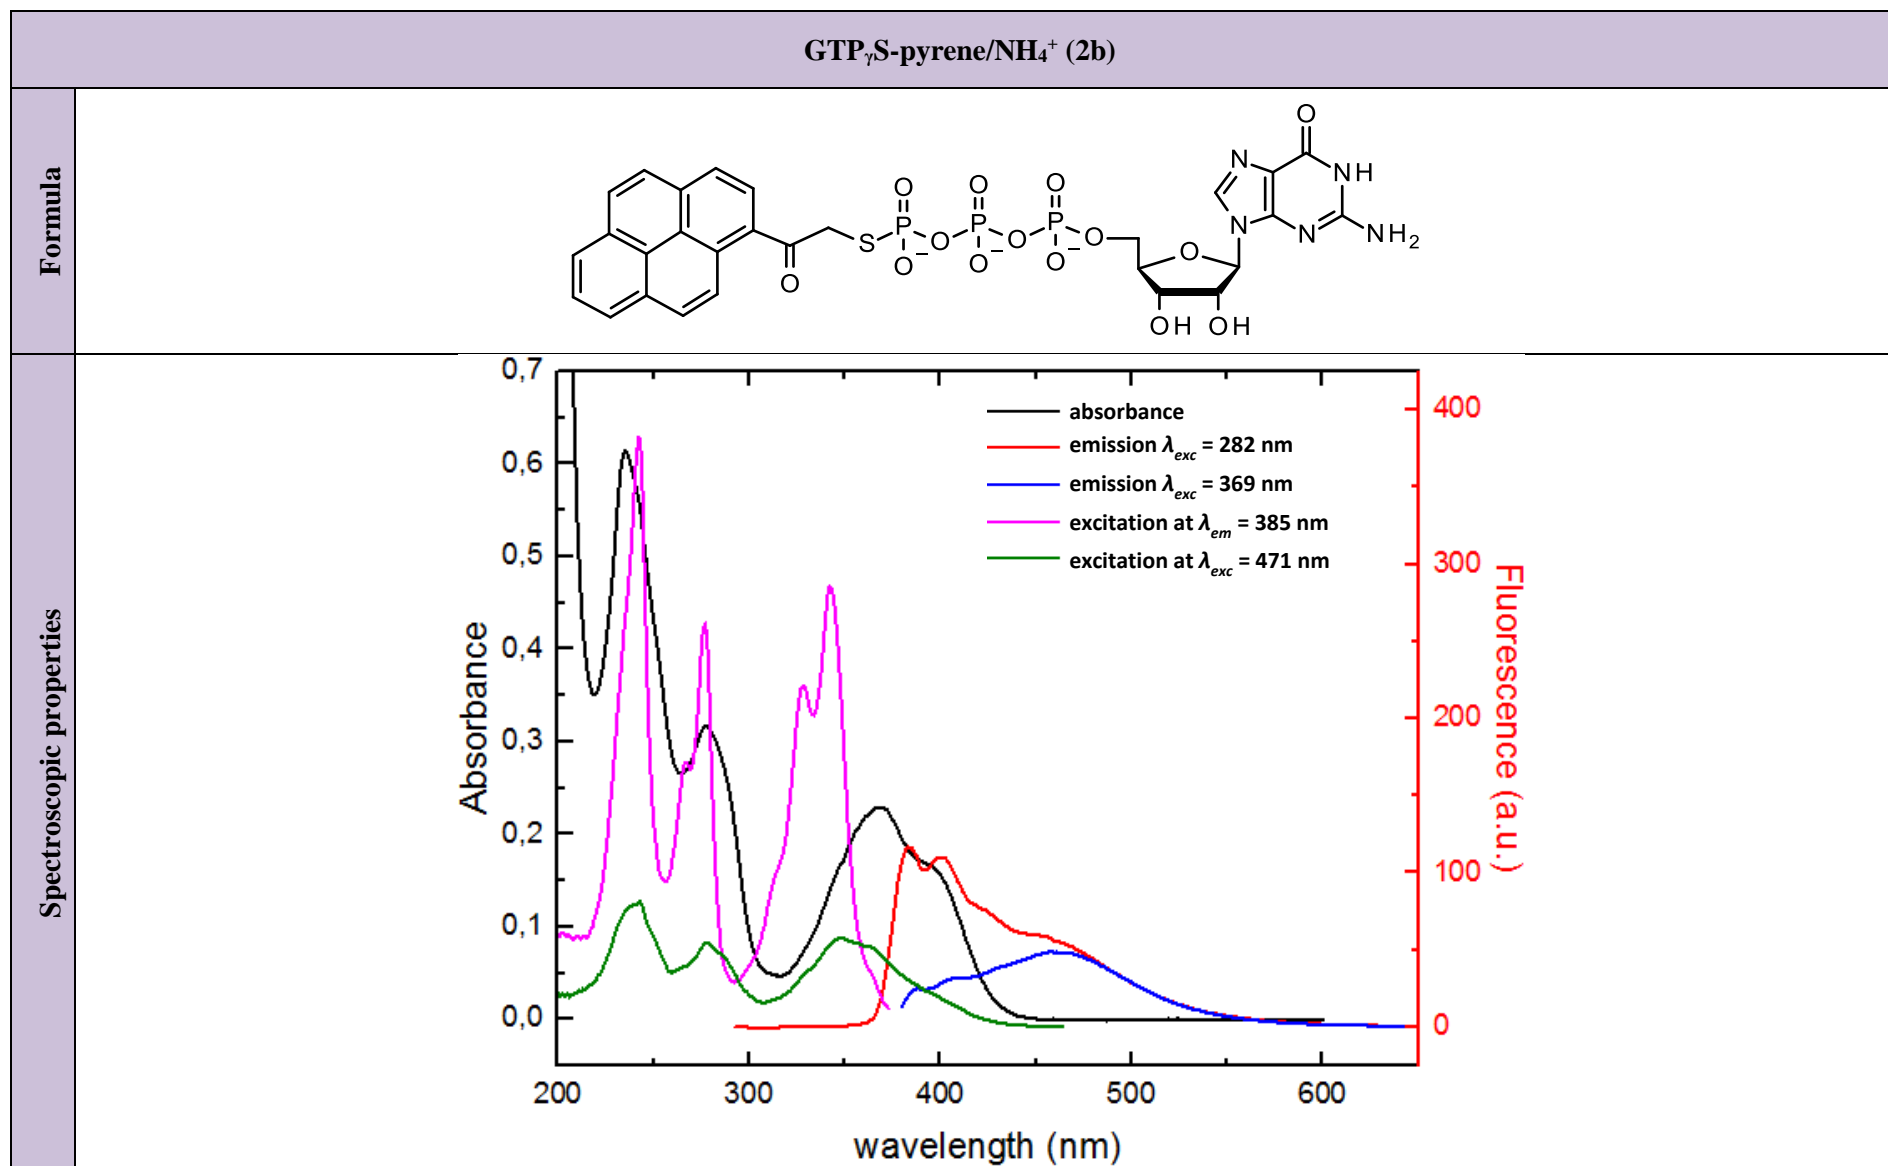

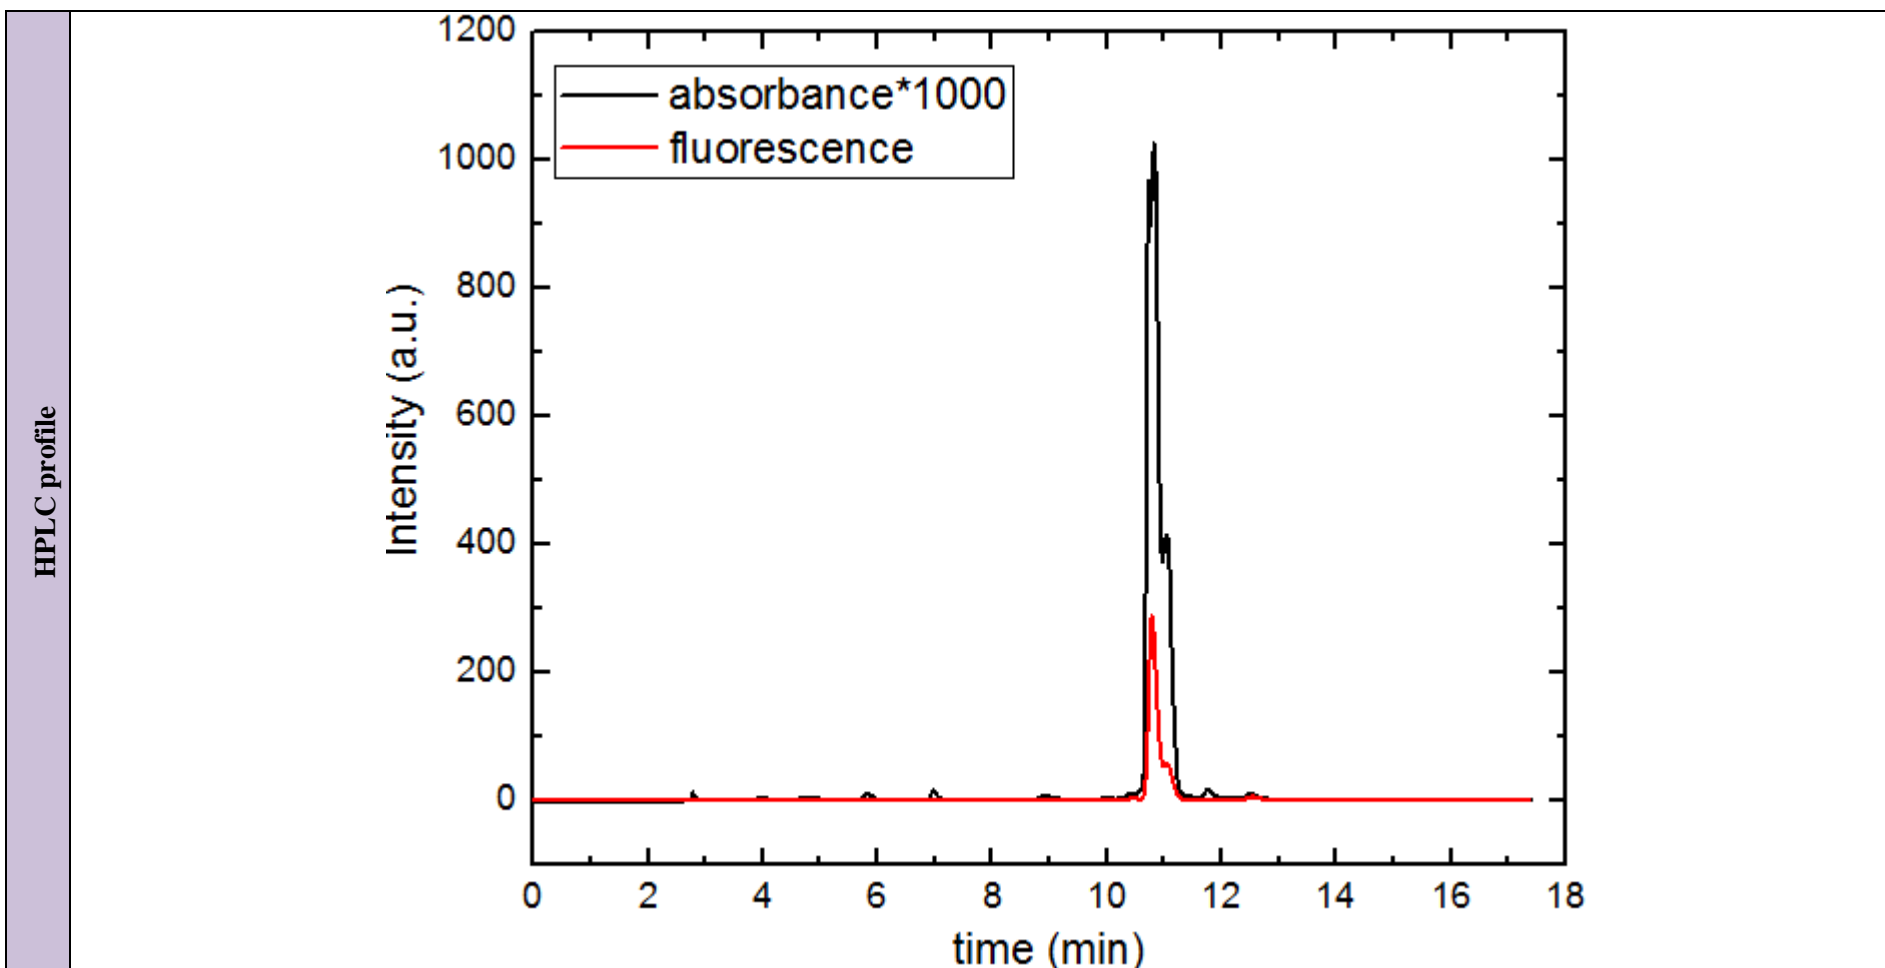

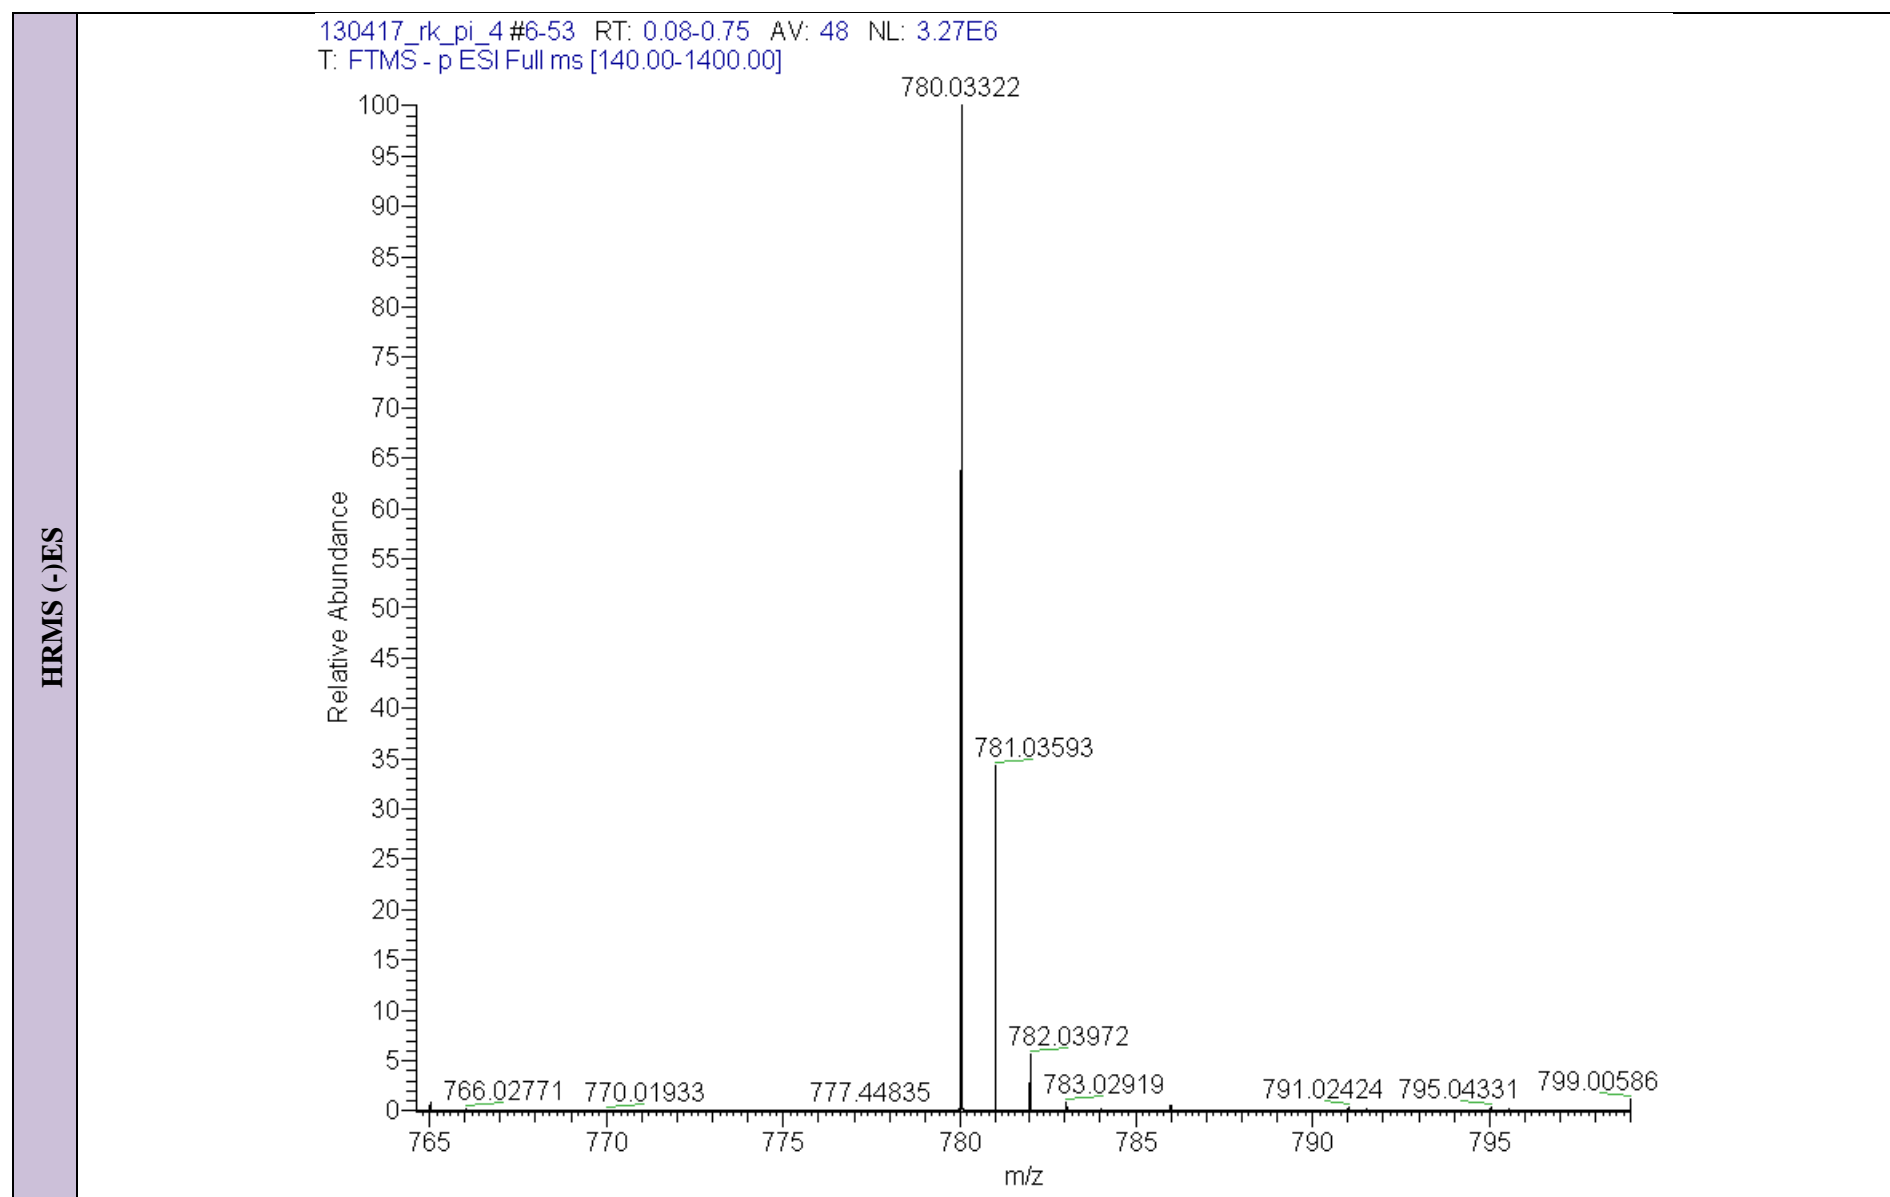



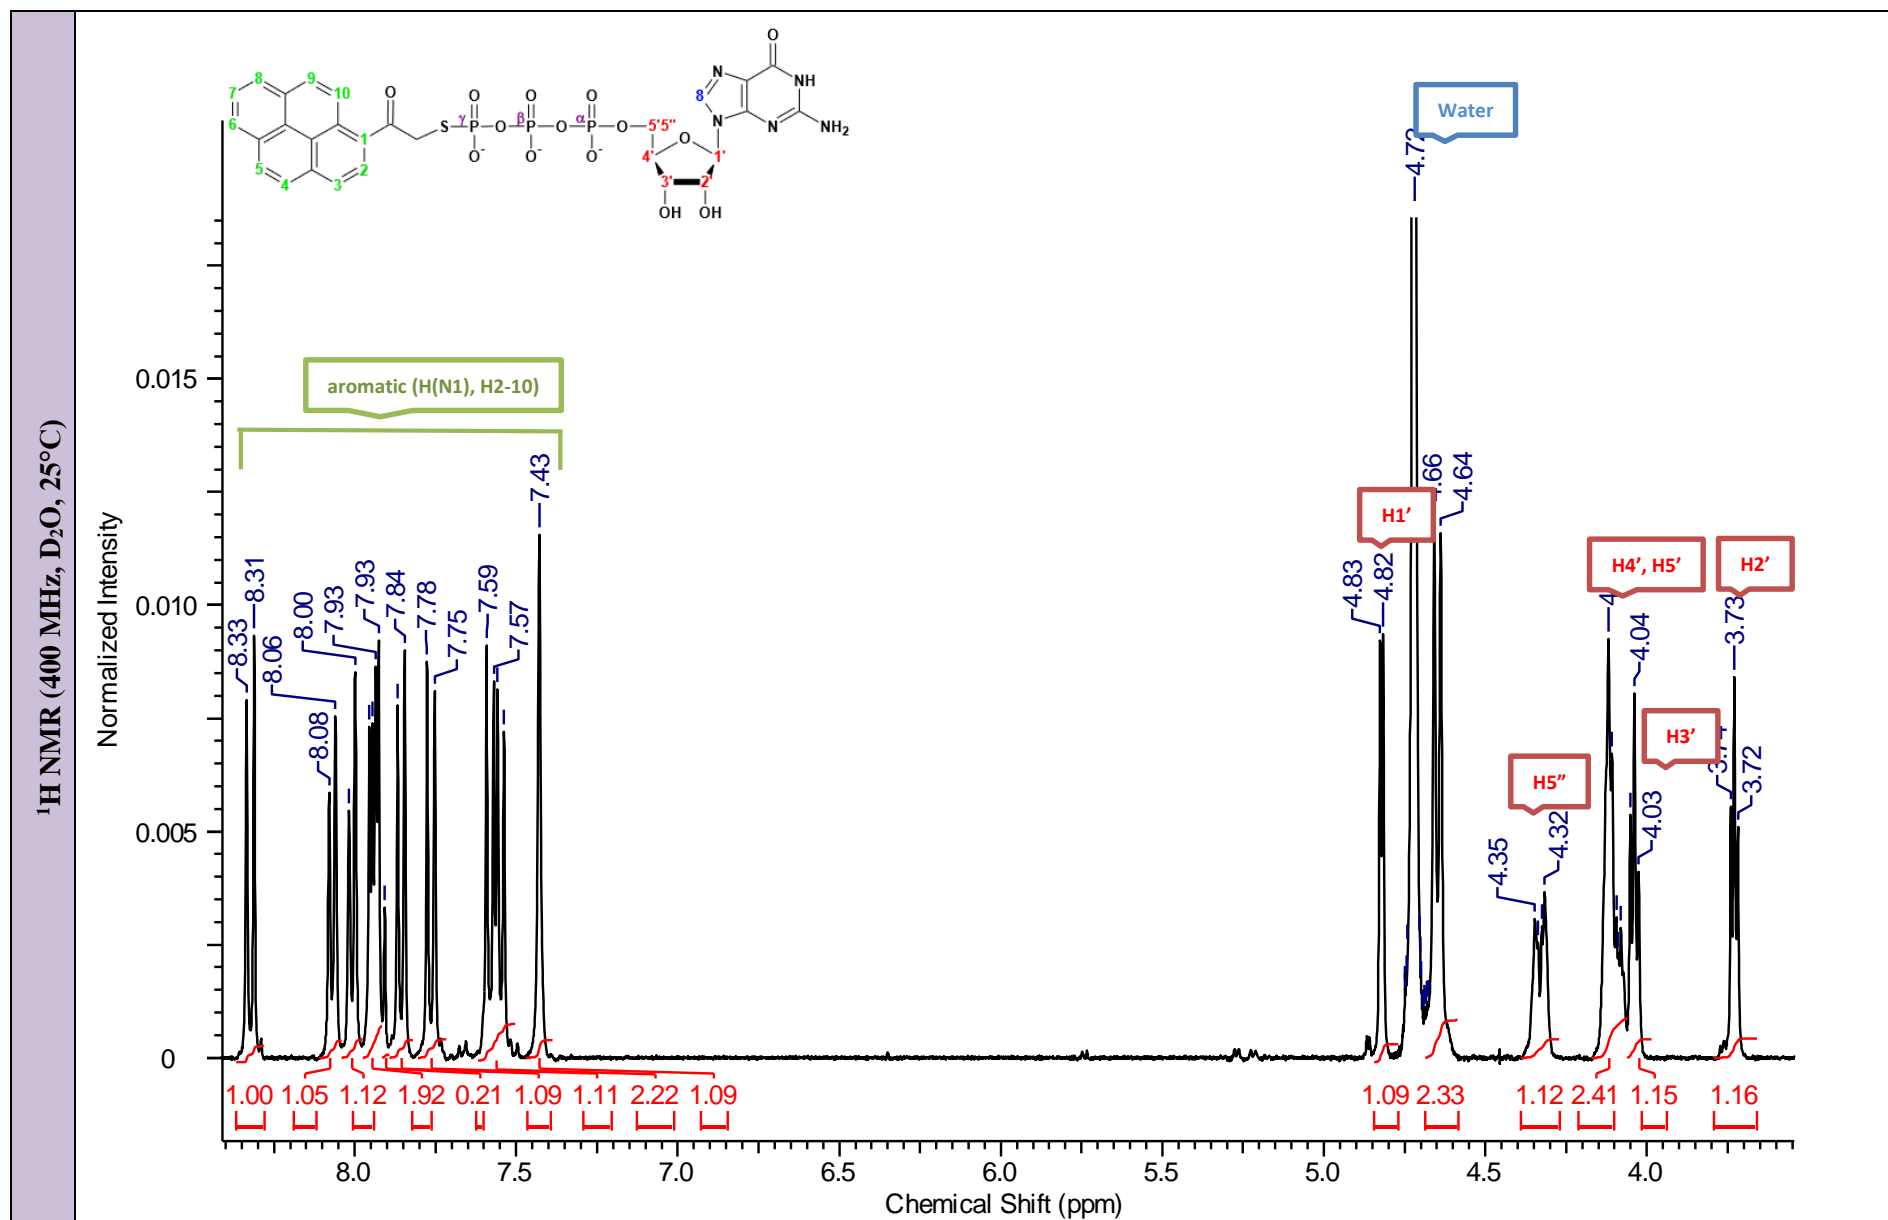

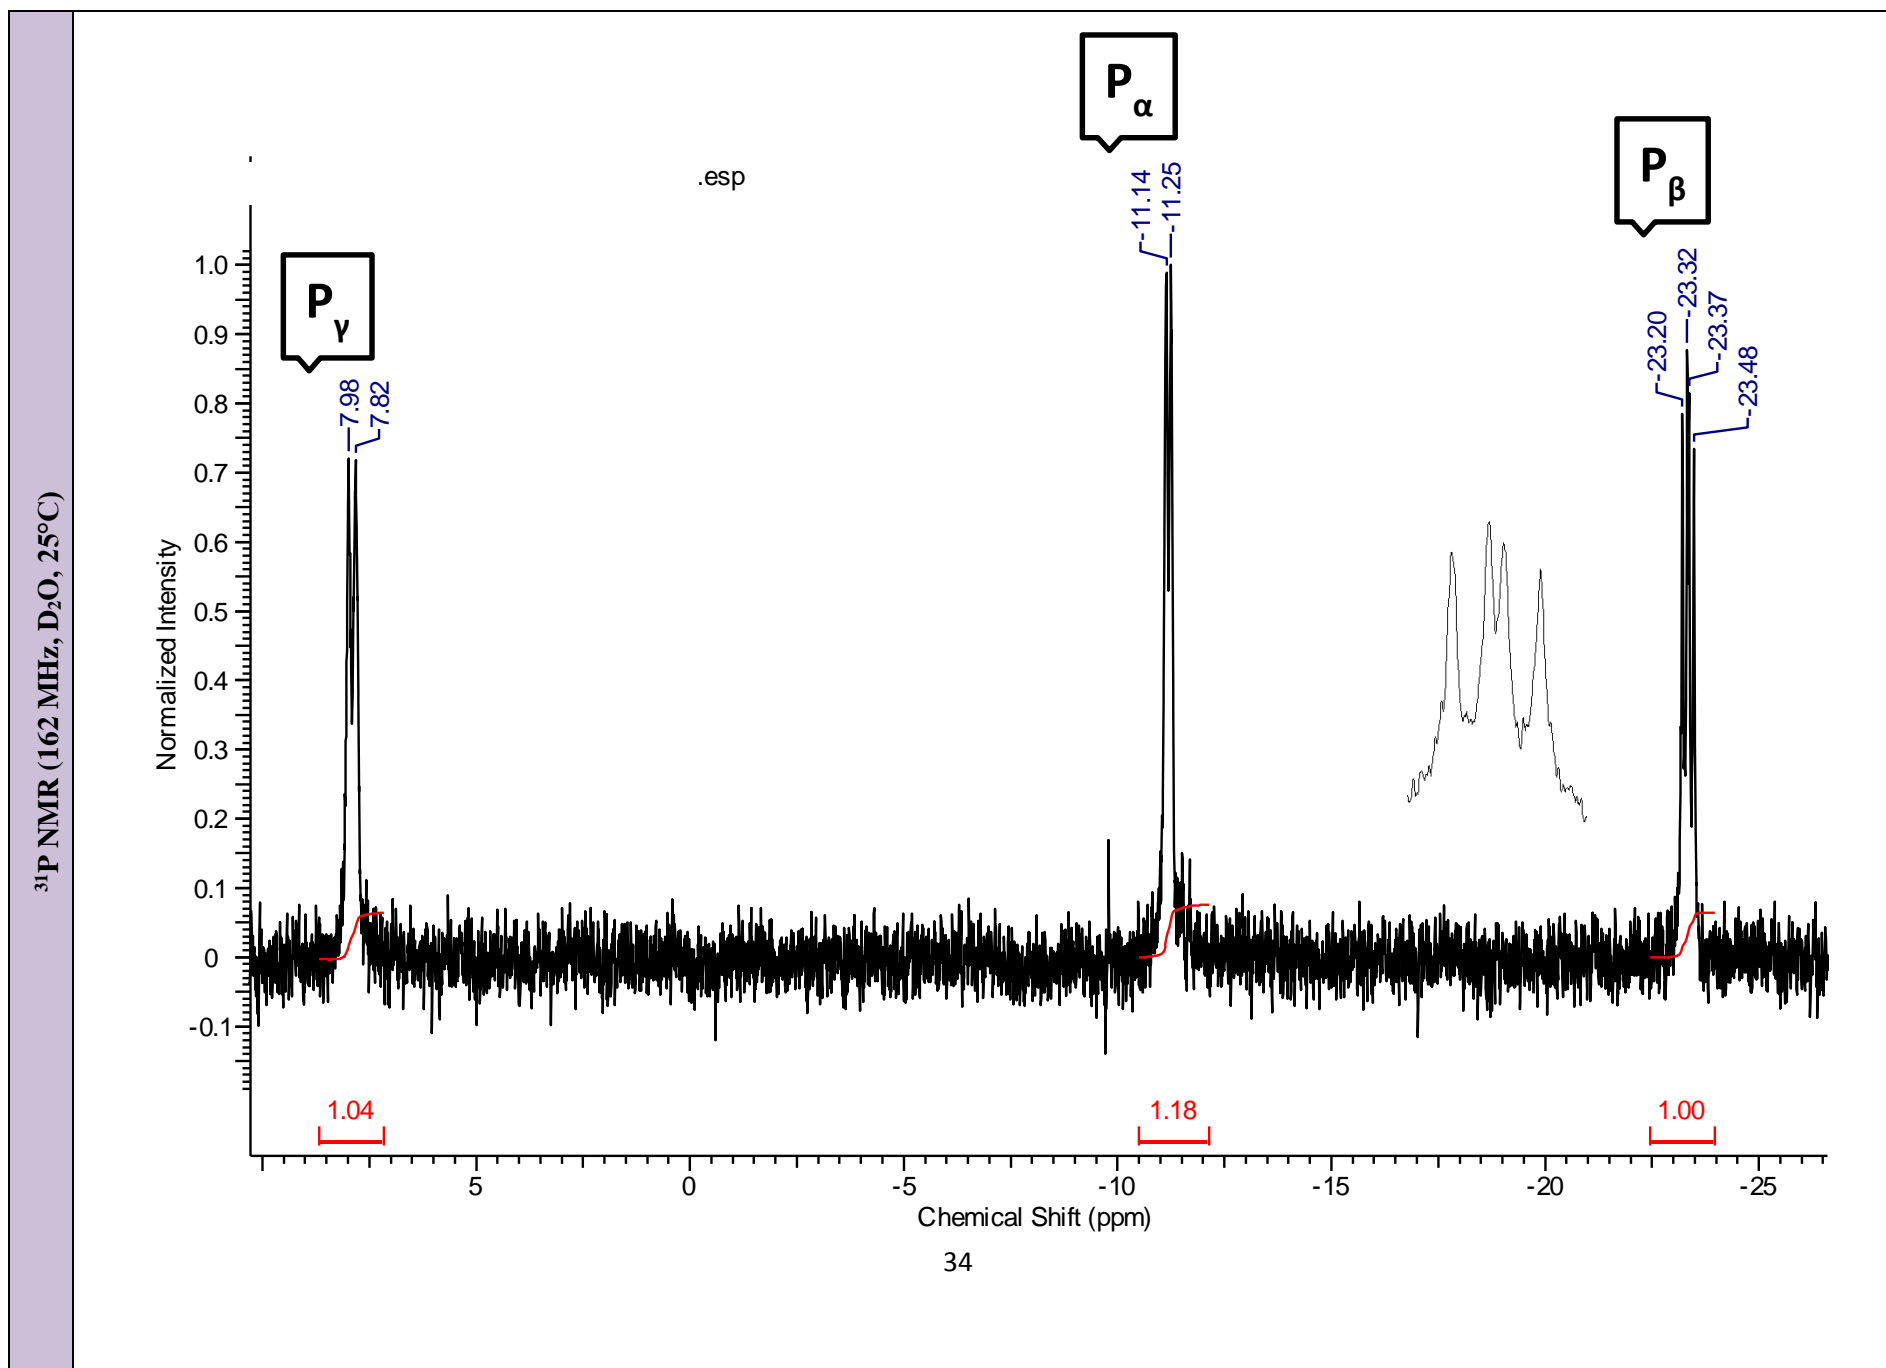

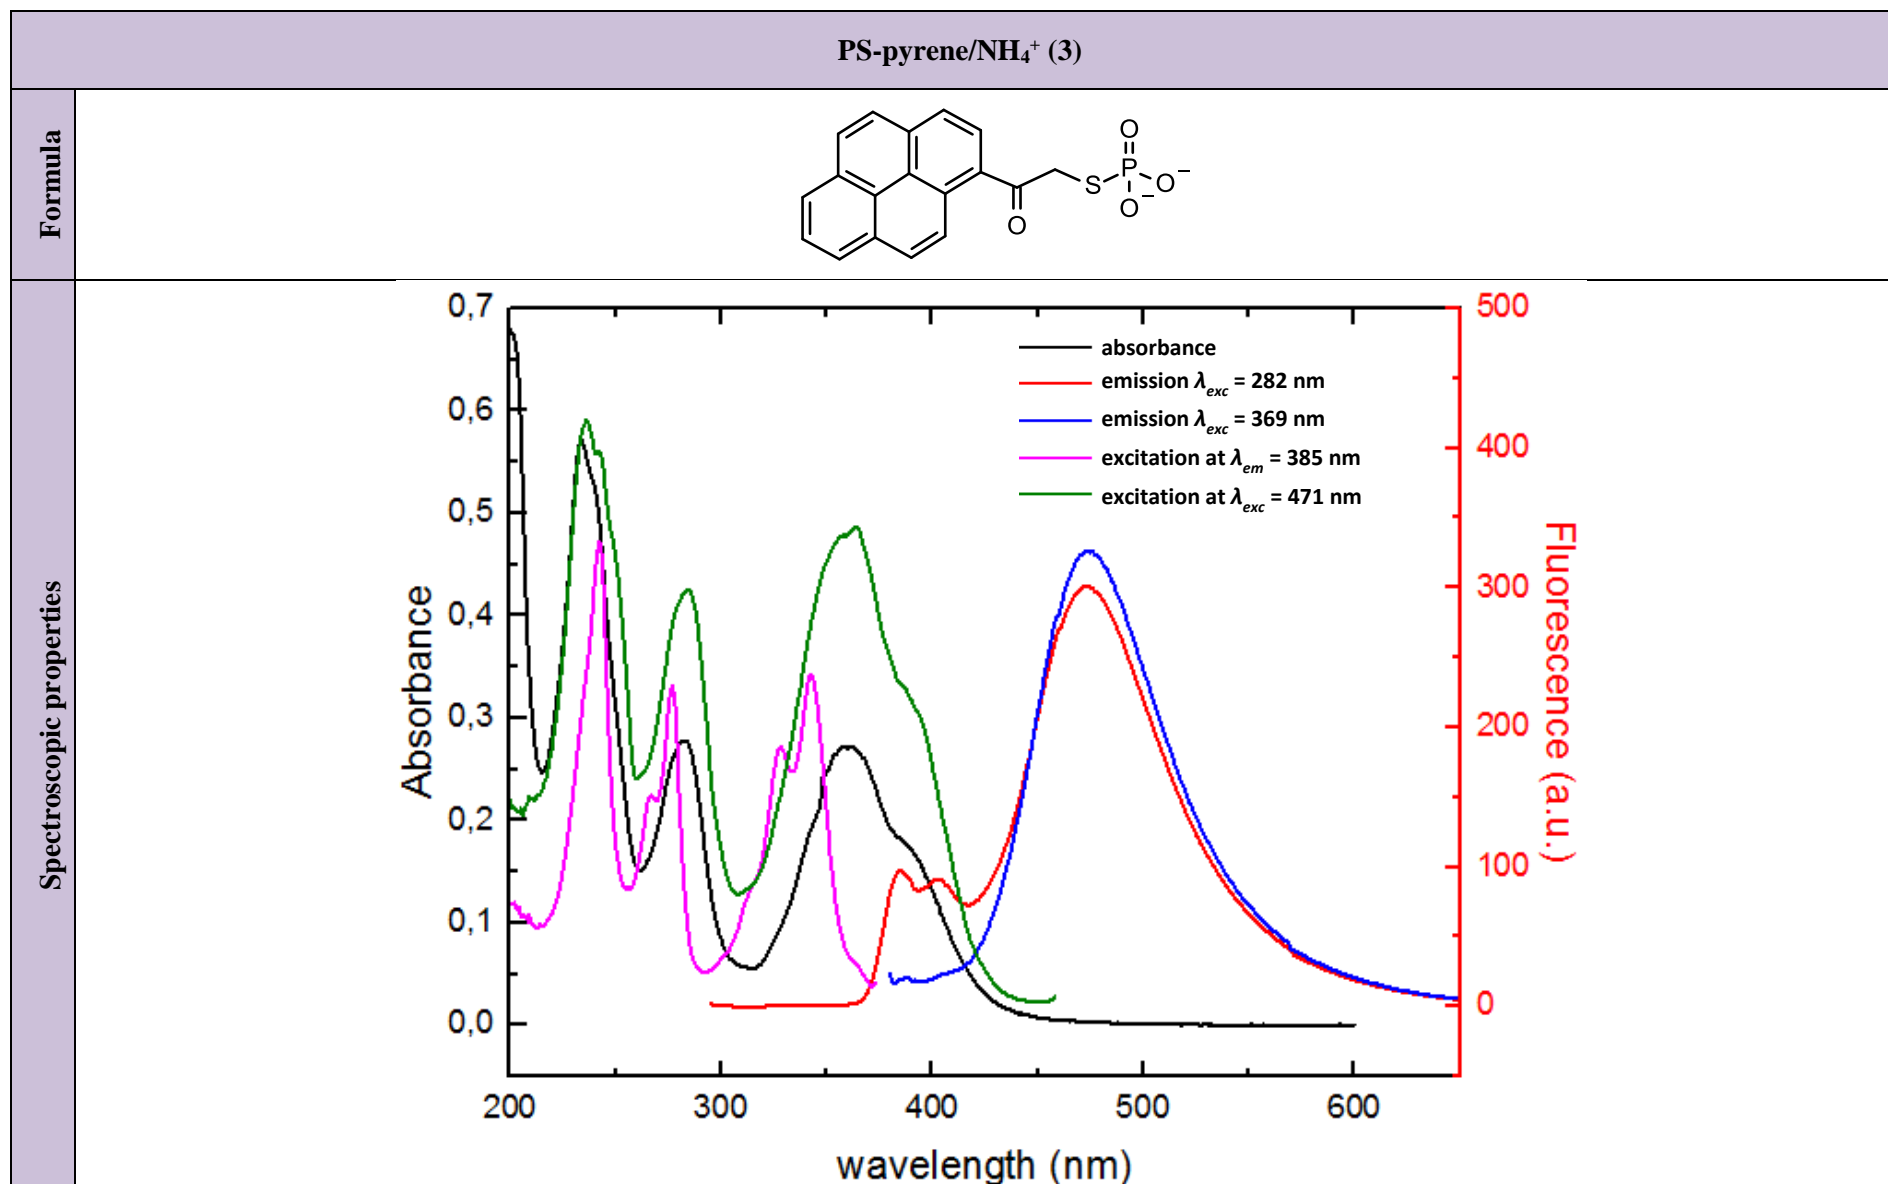

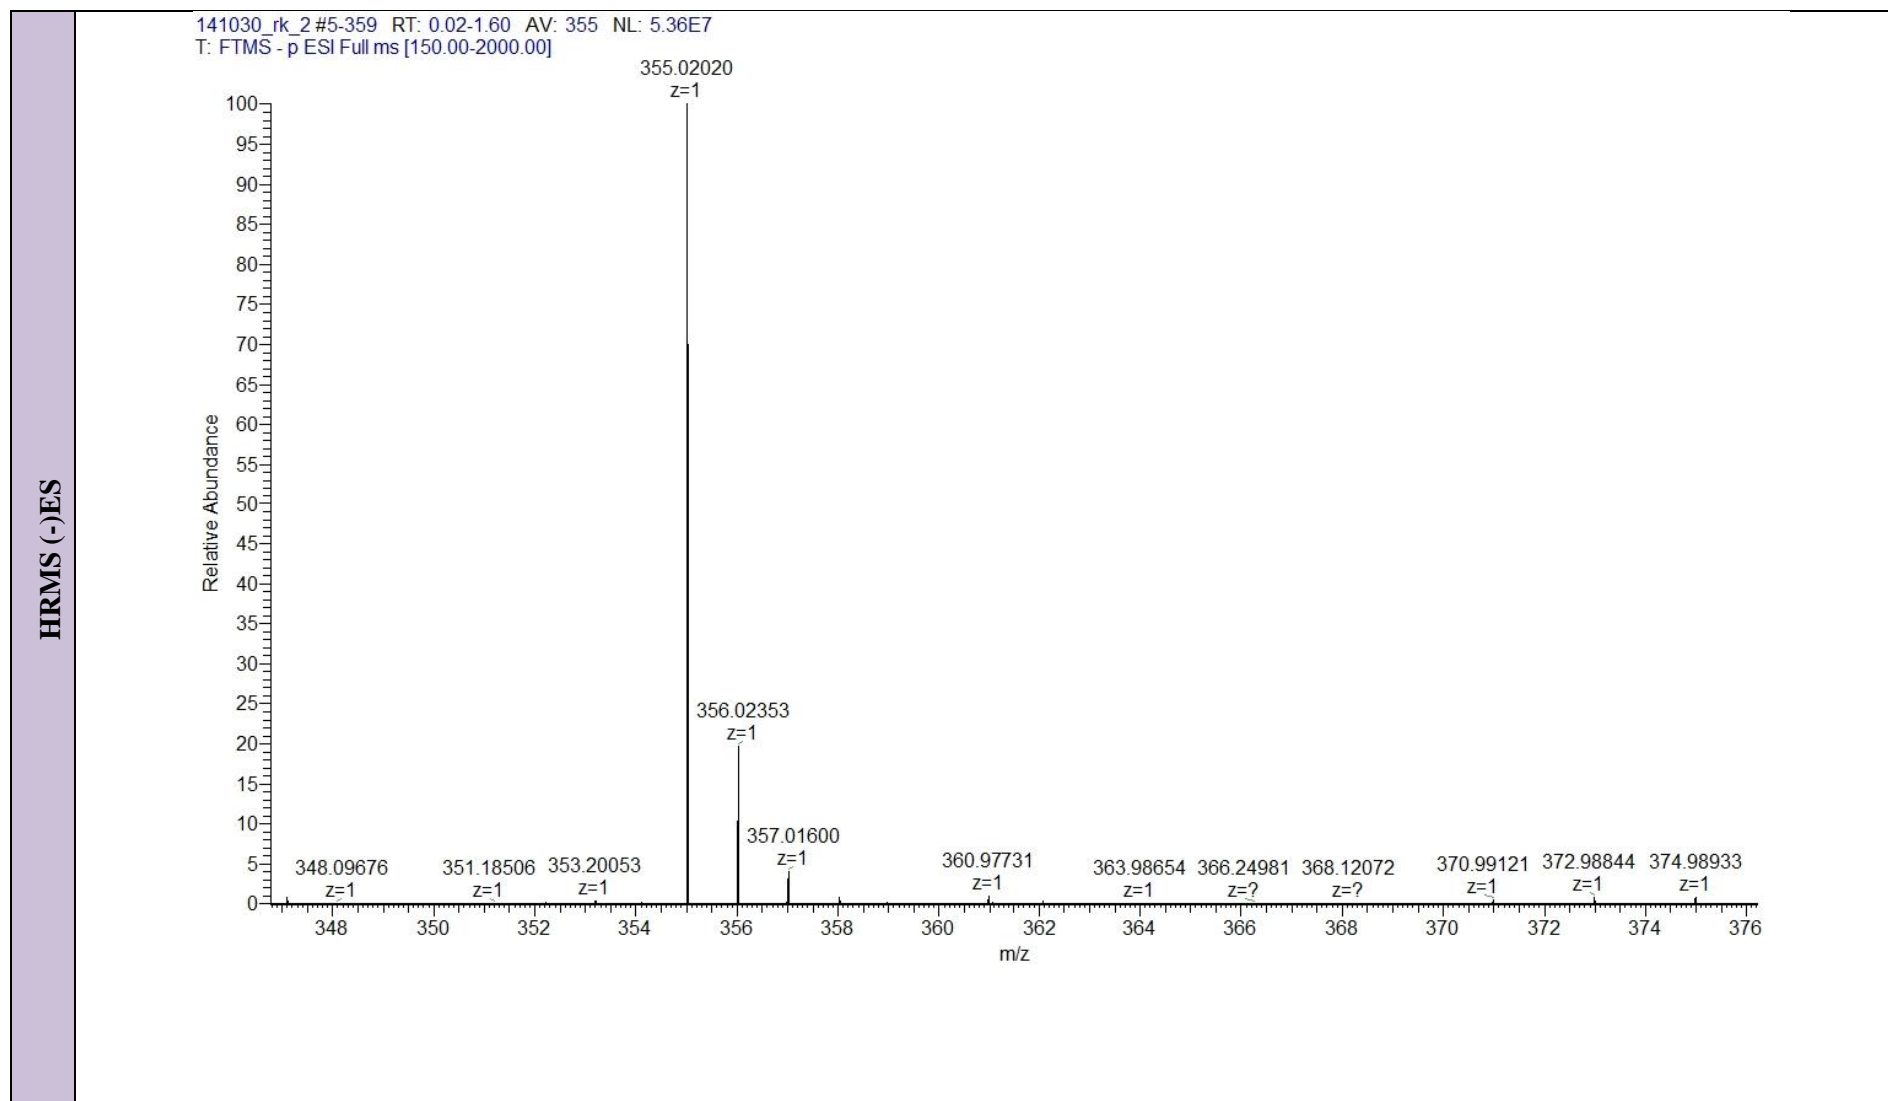

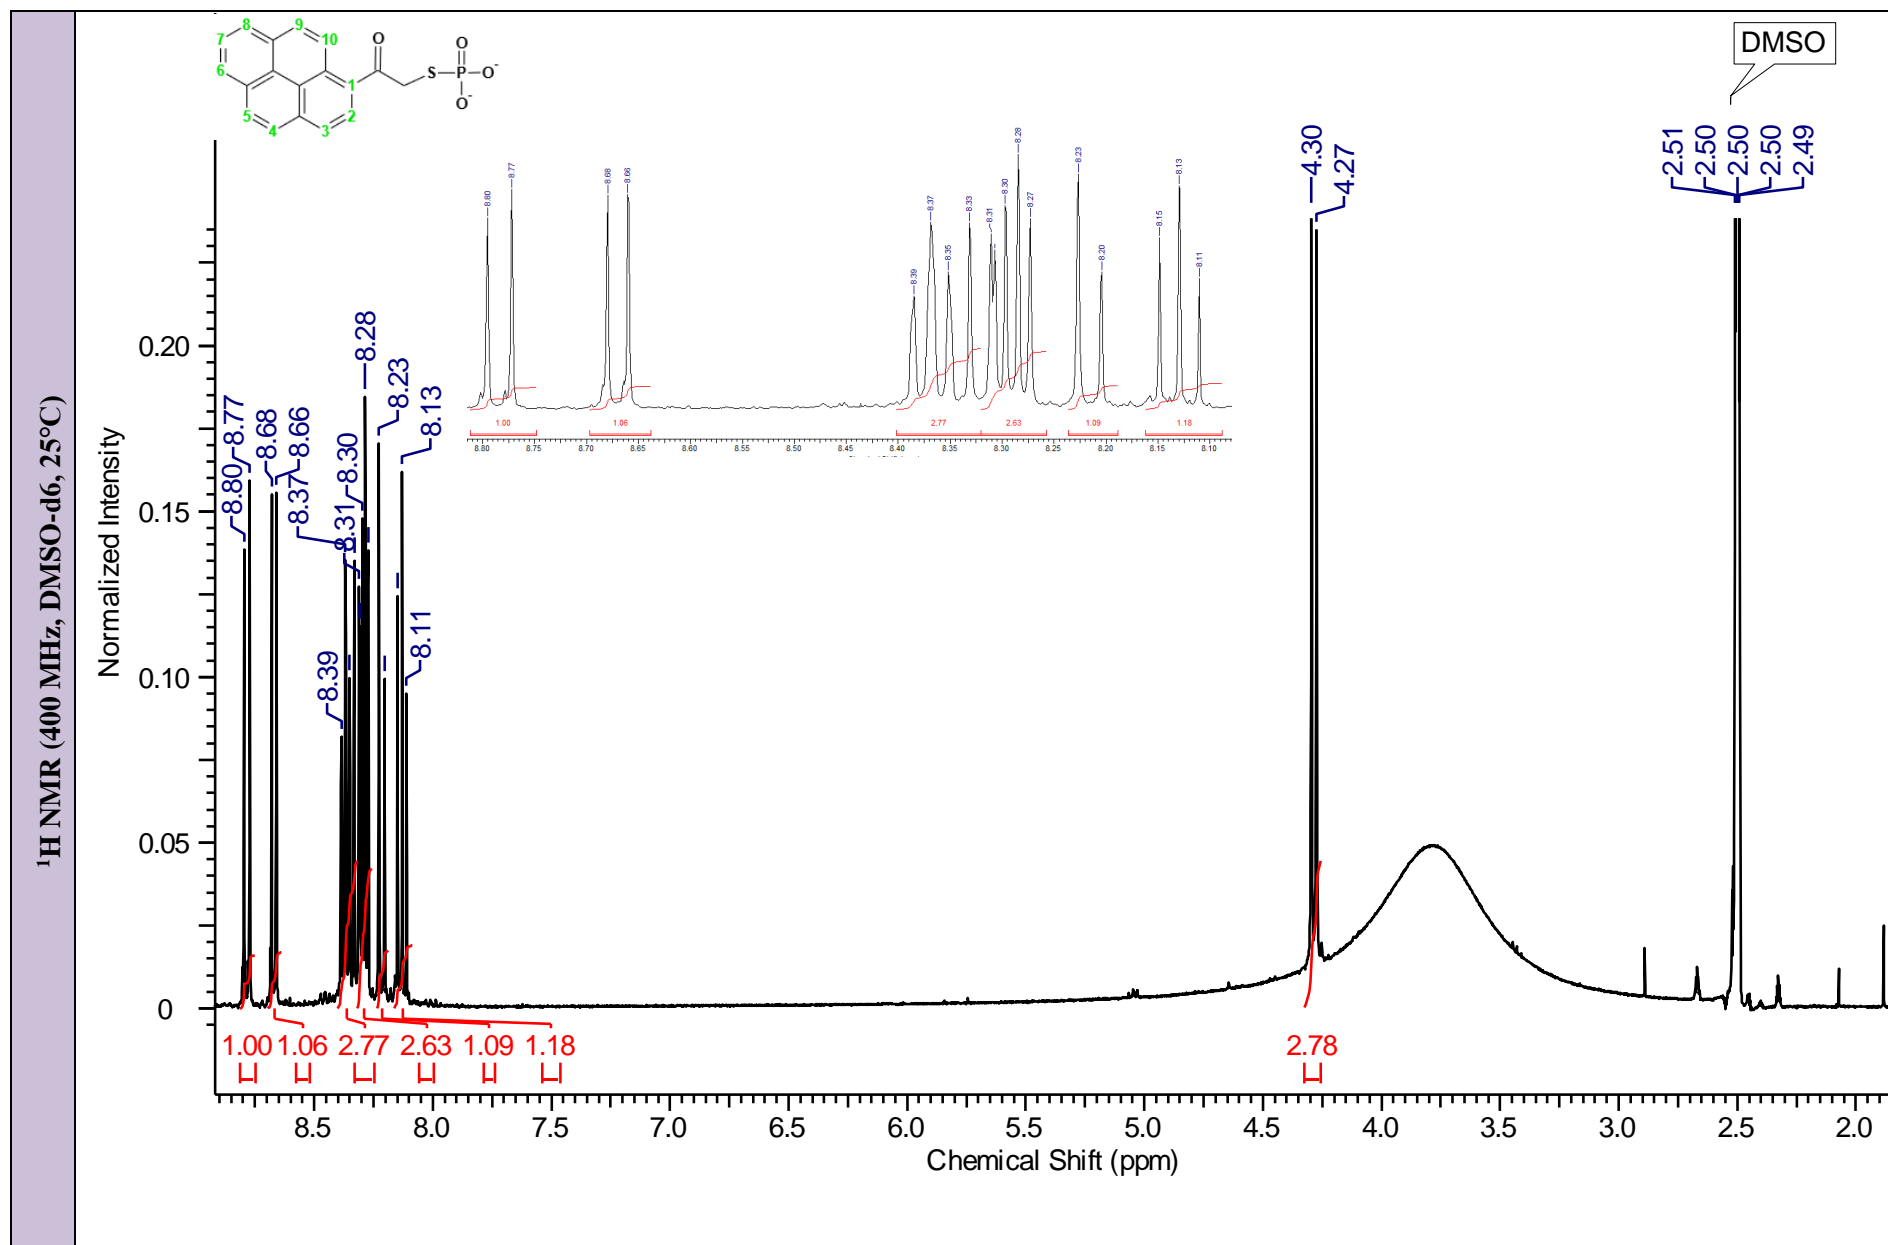

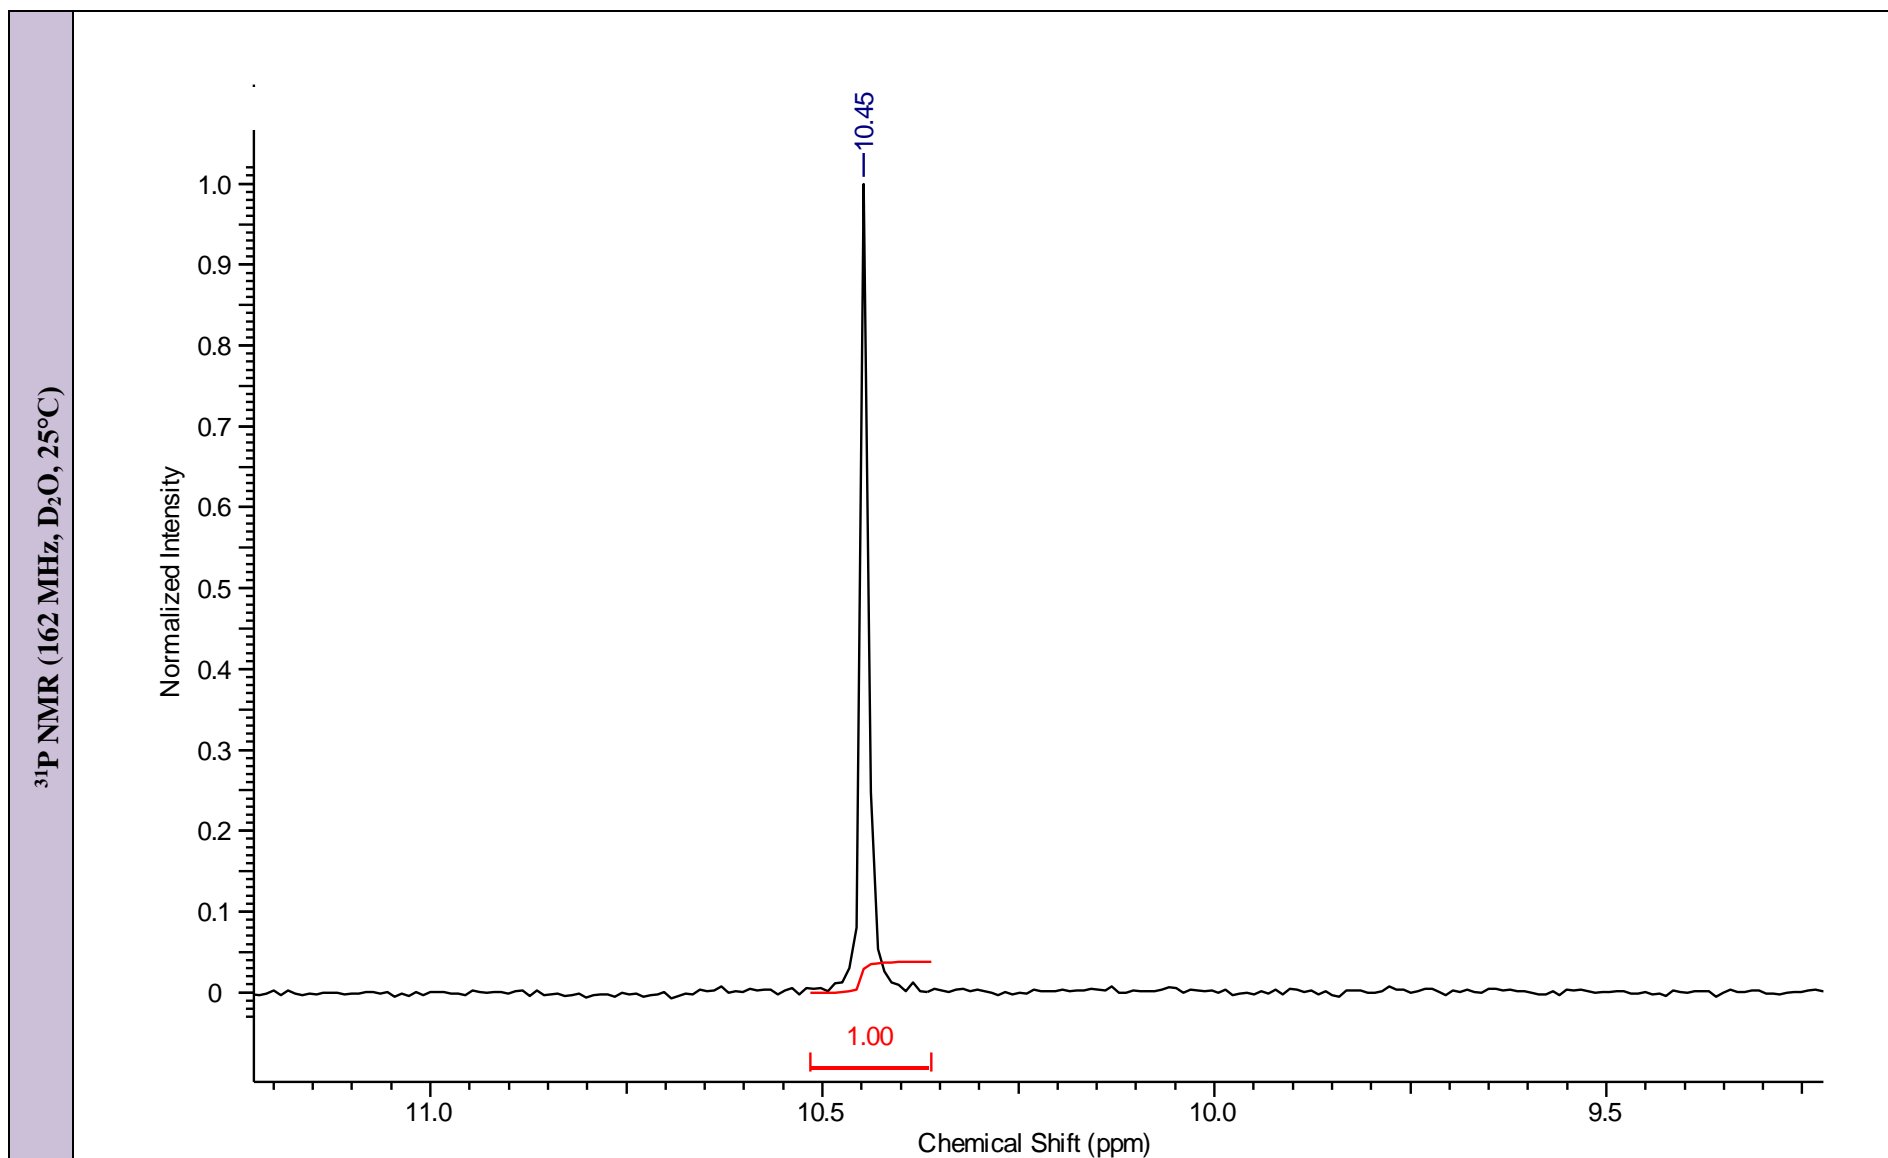

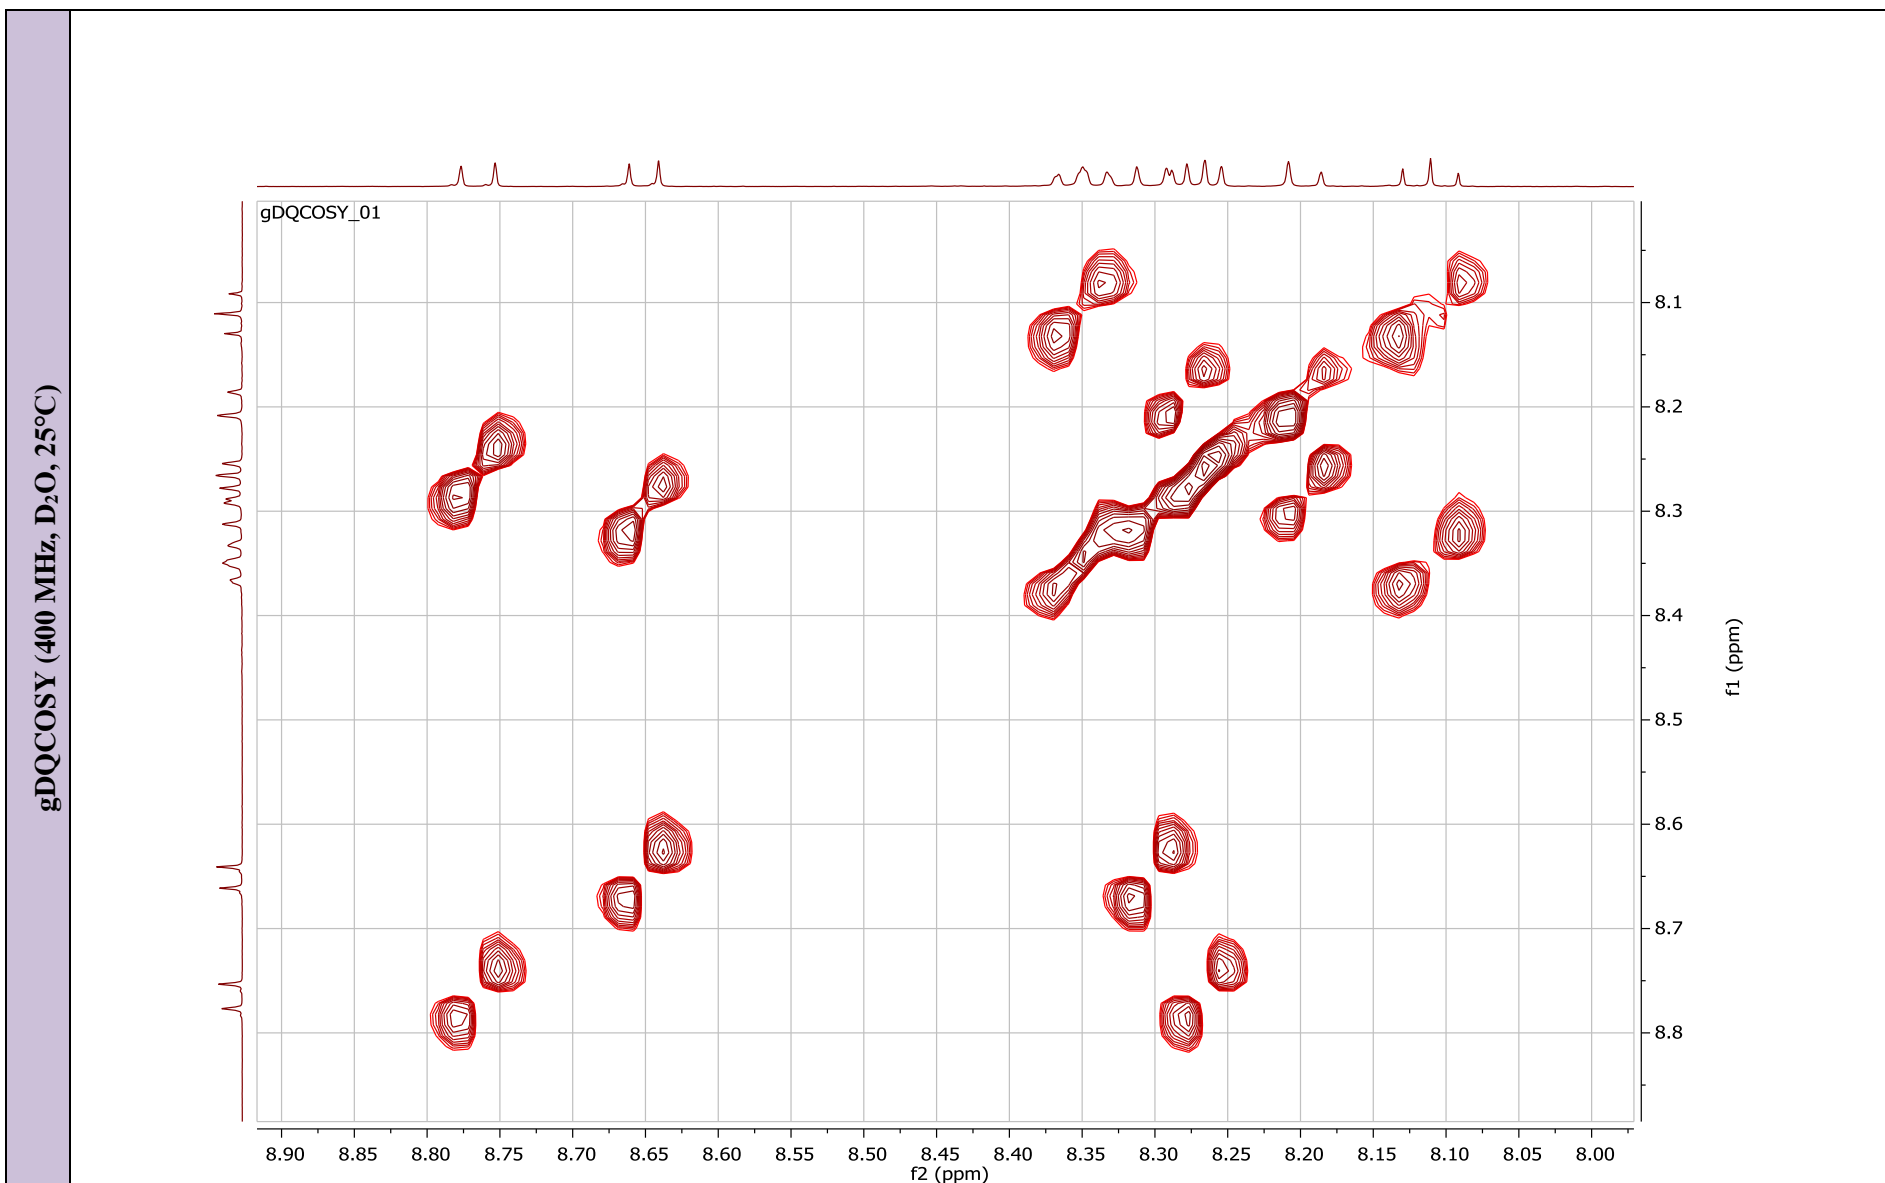

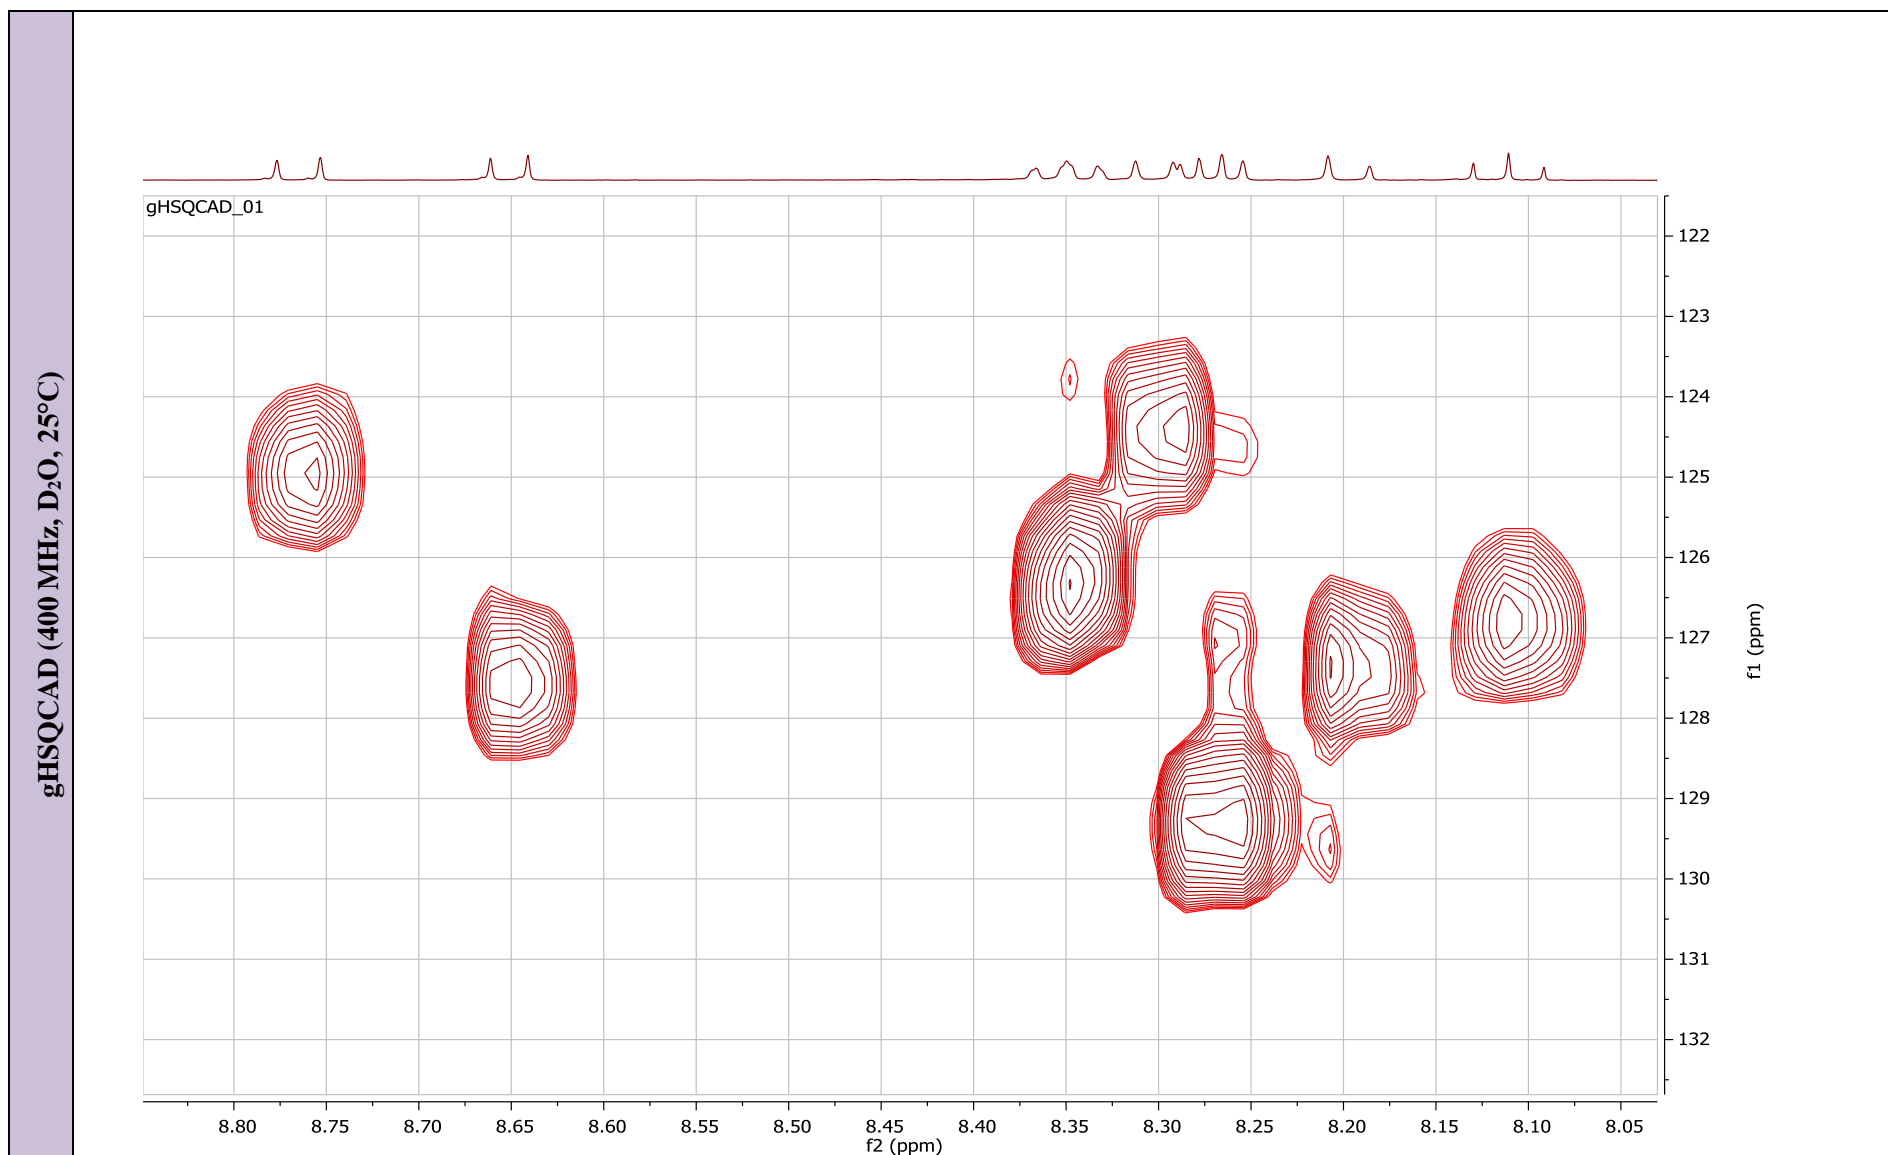

Supplement: c6ob00419a2.pdf [file c6ob00419a2.pdf]
